# Supplementary material for: Efficacy of pericapsular nerve group (PENG) block on perioperative pain management in elderly patients undergoing hip surgical procedures: a protocol for a systematic review with meta-analysis and trial sequential analysis
Source: PubMed Central journal article supplement — BMJ Open. 2023 Jan 5;13(1):e065304. doi: 10.1136/bmjopen-2022-065304 (PMC9827252; doi:10.1136/bmjopen-2022-065304), 2023-01-05
Supplement: bmjopen-2022-065304.draft_revisions.pdf [file bmjopen-2022-065304.draft_revisions.pdf]

# BMJ Open

BMJ Open is committed to open peer review. As part of this commitment we make the peer review history of every article we publish publicly available.

When an article is published we post the peer reviewers' comments and the authors' responses online. We also post the versions of the paper that were used during peer review. These are the versions that the peer review comments apply to.

The versions of the paper that follow are the versions that were submitted during the peer review process. They are not the versions of record or the final published versions. They should not be cited or distributed as the published version of this manuscript.

BMJ Open is an open access journal and the full, final, typeset and author-corrected version of record of the manuscript is available on our site with no access controls, subscription charges or pay-per-view fees (<http://bmjopen.bmj.com>).

If you have any questions on BMJ Open's open peer review process please email [info.bmjopen@bmj.com](mailto:info.bmjopen@bmj.com)

# BMJ Open

## **Efficacy of pericapsular nerve group (PENG) block on perioperative pain management in elderly patients undergoing hip surgical procedures: a protocol for a systematic review with meta-analysis and trial sequential analysis**

|                               |                                                                                                                                                                                                                                                                                                                                                                                                                                                                                                                                   |
|-------------------------------|-----------------------------------------------------------------------------------------------------------------------------------------------------------------------------------------------------------------------------------------------------------------------------------------------------------------------------------------------------------------------------------------------------------------------------------------------------------------------------------------------------------------------------------|
| Journal:                      | <i>BMJ Open</i>                                                                                                                                                                                                                                                                                                                                                                                                                                                                                                                   |
| Manuscript ID                 | bmjopen-2022-065304                                                                                                                                                                                                                                                                                                                                                                                                                                                                                                               |
| Article Type:                 | Protocol                                                                                                                                                                                                                                                                                                                                                                                                                                                                                                                          |
| Date Submitted by the Author: | 31-May-2022                                                                                                                                                                                                                                                                                                                                                                                                                                                                                                                       |
| Complete List of Authors:     | Zheng, Jianqiao; Sichuan University West China Hospital, Department of Anesthesiology<br>Du, Li; Sichuan Cancer Hospital and Research Institute, Department of Anesthesiology<br>Chen, Guo; Sichuan University West China Hospital, Department of Anesthesiology<br>Zhang, Lu; Sichuan University West China Hospital, Department of Anesthesiology<br>Deng, Xiaoqian; Sichuan University West China Hospital, Department of Anesthesiology<br>Zhang, Weiyi; Sichuan University West China Hospital, Department of Anesthesiology |
| Keywords:                     | Hip < ORTHOPAEDIC & TRAUMA SURGERY, Anaesthesia in orthopaedics < ANAESTHETICS, Pain management < ANAESTHETICS                                                                                                                                                                                                                                                                                                                                                                                                                    |
|                               |                                                                                                                                                                                                                                                                                                                                                                                                                                                                                                                                   |

SCHOLARONE™  
Manuscripts

**TITLE PAGE**

Efficacy of pericapsular nerve group (PENG) block on perioperative pain management in elderly patients undergoing hip surgical procedures: a protocol for a systematic review with meta-analysis and trial sequential analysis

**Authors**

Jianqiao Zheng<sup>1</sup> E-mail: zhjq1983@163.com

Li Du<sup>2</sup> E-mail: huaying-duli@163.com

Guo Chen<sup>1</sup> E-mail: Anesthesiology\_SCU@163.com

Lu Zhang<sup>1</sup> E-mail: 304022514@qq.com

Xiaoqian Deng<sup>1</sup> E-mail: 50058837@qq.com

\*Weiyi Zhang<sup>1</sup> E-mail: zhangweiyi@wchscu.cn

<sup>1</sup>Department of Anesthesiology, West China Hospital, Sichuan University No. 37th, Guoxue Alley, Wuhou District, Chengdu 610041, Sichuan, China.

<sup>2</sup>Department of Anesthesiology, Sichuan Cancer Hospital & Institute, Sichuan Cancer Center, School of Medicine, University of Electronic Science and Technology of China, No.55th, People's South Road, Chengdu 610041, Sichuan, China.

\*Corresponding Author

Name: Weiyi Zhang

E-mail: zhangweiyi@wchscu.cn

Phone: +86-28-8542-3593

Address: Department of Anesthesiology, Sichuan University West China Hospital, No. 37th, Guoxue Alley, Wuhou District, Chengdu 610041, Sichuan, China.

Words: 3902

## ABSTRACT

**Introduction** An increasing number of elderly patients suffer from hip diseases associated with moderate to severe perioperative pain during the global accelerating ageing process. Optimal analgesia can decrease perioperative complications and facilitate elderly patient's perioperative recovery. Pericapsular nerve group (PENG) block is a relatively new, analgesia adequate, and motor-sparing block technique for perioperative pain management of hip diseases. However, the efficacy of PENG block remains unclear as the limited clinical evidence. Then, we will perform a protocol for a systematic review and meta-analysis to identify the efficacy of PENG block for perioperative pain management.

**Methods and analysis** PubMed, Ovid Medline, Cochrane Library, Embase, Web of Science, China National Knowledge Infrastructure, Chinese BioMedical Literature, Wanfang and VIP databases will be searched from inception to August 2022 to identify randomized controlled trials of elderly patients accepting PENG block for hip diseases. Primary outcome will be the pain intensity after pain management. Secondary outcomes will be quadriceps strength, perioperative rescue analgesia information and perioperative complications. Assessment of heterogeneity will be primarily inspected by forest plots. if there is no indication of funnel plot asymmetry, a random-effects meta-analysis will be performed. The Cochrane risk-of-bias tool, GRADE (Grading of Recommendations

1  
2  
3  
4 Assessment, Development and Evaluation) and trial sequential analysis  
5  
6 will be conducted to evaluate the evidence quality and control the random  
7  
8 errors. Funnel plots and Egger's regression test will be performed to  
9  
10 evaluate publication bias.  
11  
12

13  
14 **Ethics and dissemination** Ethical approval was not required for this  
15  
16 systematic review protocol. The results will be disseminated through peer-  
17  
18 reviewed publications.  
19  
20

21  
22 **Keywords** pericapsular nerve group block, hip, elderly, meta-analysis,  
23  
24 randomized controlled trial.  
25  
26

27 **PROSPERO registration number** CRD42022313895  
28  
29

### 30 **Strengths and limitations of the study**

31  
32 ▶ Application of Preferred Reporting Items for Systematic Review and  
33  
34 Meta-Analysis Protocols (PRISMA-P) guidelines for better quality of  
35  
36 meta-analytical results.  
37  
38

39  
40 ▶ Control of random errors with trial sequential analysis by calculating  
41  
42 the diversity adjusted information size for the outcomes.  
43  
44

45  
46 ▶ Application of Funnel plots and Egger's regression test for Publication  
47  
48 bias.  
49

50  
51 ▶ Subgroup analysis based on patients' age, types of hip disease or surgery,  
52  
53 perioperative period, type of anesthesia and perioperative pain  
54  
55 management techniques for heterogeneity assessment.  
56  
57  
58  
59  
60

## INTRODUCTION

The global population greater than 60 years old is estimated to increase to 2.1 billion in 2050 (approximately 22% of the global population), and 3.1 billion by the year of 2100.<sup>1</sup> With this accelerating ageing process, an increasing number of elderly patients suffer from hip diseases such as hip fractures and hip osteoarthritis.<sup>2-4</sup> Hip surgery, including hip arthroplasty, hip fracture internal fixation and hip arthroscopy procedures are the main treatments for hip diseases.<sup>5-8</sup> Hip surgery is often associated with moderate to severe postoperative pain, particularly in hip fracture patients undergoing surgical treatment, and severe pain persists throughout the whole perioperative period.<sup>9-11</sup> As a minimally invasive approach, arthroscopic hip surgery is gaining popularity globally.<sup>12</sup> Despite being minimally invasive, patients undergoing arthroscopic hip surgery may still experience severe pain after the procedure.<sup>13</sup>

Perioperative pain, if inadequately controlled, can increase the risk of perioperative complications (including delirium, pulmonary complications and cardiovascular events), delay ambulation, decrease short-term mobility, interfere with rehabilitation, increase hospital length of stay, and even increase the mortality and morbidity, leading to poor functional prognosis.<sup>14-19</sup> Particularly in elderly patients, the risk of perioperative adverse events is higher due to the presence of polypharmacy and

1  
2  
3  
4 multimorbidity.<sup>20-22</sup> In contrast, adequate pain management has been  
5  
6 shown to facilitate postoperative mobilization, improve mobility and  
7  
8 promote better functional recovery.<sup>23-26</sup> Early mobilization has been  
9  
10 associated with a reduction in postoperative complications, including  
11  
12 pneumonia, venous thromboembolism, pressure ulcers, and delirium.<sup>27-29</sup>  
13  
14 Therefore, an optimal perioperative analgesia can facilitate elderly patients'  
15  
16 perioperative recovery particularly.<sup>30-33</sup>  
17  
18  
19  
20  
21

22 Traditionally, opioid analgesia is considered to be the basis of the  
23  
24 perioperative pain management.<sup>34-37</sup> However, opioid-related  
25  
26 complications such as delirium, urinary retention, nausea, constipation and  
27  
28 respiratory depression may occur and can delay patient's recovery and  
29  
30 discharge.<sup>38-43</sup> Considering these adverse events, especially the higher  
31  
32 incidence of cognitive deficits in elderly patients suffering a hip fracture,  
33  
34 opioid analgesics are often selected hesitantly.<sup>44-48</sup> In addition, in light of  
35  
36 the current opioid crisis, strategies to minimize opioid use, including the  
37  
38 use of multimodal perioperative pain management strategies with opioid-  
39  
40 sparing oral and intravenous medications, regional anesthesia and  
41  
42 analgesic techniques have become an increasing clinical focus in hip  
43  
44 surgical procedures in elderly patients, as to decrease perioperative  
45  
46 analgesic consumption.<sup>49-53</sup>  
47  
48  
49  
50  
51  
52  
53  
54  
55

56 Peripheral nerve blocks, including lumbar plexus block, femoral  
57  
58 nerve block, fascia iliac compartment block, 3-in-1 femoral nerve block,  
59  
60

1  
2  
3  
4 sacral plexus block, obturator and sciatic nerve block and some inter-  
5  
6 fascial plane blocks such as quadratus lumborum block, have also been  
7  
8 suggested to decrease postoperative pain and opioid use during hip  
9  
10 surgery.<sup>54-61</sup> However, peripheral nerve blocks may induce weakness of the  
11  
12 quadriceps muscles, delay hospital discharge, and even predispose the  
13  
14 patient to fall.<sup>62-65</sup> In some cases, it is difficult to position the patient as the  
15  
16 extreme pain, particularly in hip fractures, accompanied by the deep depth  
17  
18 of the block target, the lumbar plexus or quadratus lumborum block will  
19  
20 become difficult.<sup>66-68</sup> In addition, another difficulty of adequate regional  
21  
22 analgesia for hip pain is the complex innervation of the hip joint.<sup>69</sup> High  
23  
24 branches of both the femoral and obturator nerves provide innervation to  
25  
26 the anterior hip capsule. The accessory obturator nerve was also found to  
27  
28 innervate the medial capsule.<sup>70 71</sup> In this situation, the coverage of the  
29  
30 articular nerve supply to the hip joint is critical for an effective analgesia.  
31  
32 Hence, a simple, easy-to-perform, analgesia adequate and motor-sparing  
33  
34 regional analgesia technique is the ideal regional analgesia technique for  
35  
36 hip surgery.  
37  
38  
39  
40  
41  
42  
43  
44  
45  
46  
47

48 Pericapsular nerve group (PENG) block is a relatively new peripheral  
49  
50 nerve block technique, first described by Giron-Arango in patients with hip  
51  
52 fractures, based on the complex innervation of the hip joint.<sup>72</sup> The targets  
53  
54 of the PENG block are the musculofascial plane between the psoas tendon  
55  
56 anteriorly and the pubic ramus posteriorly, so it can be easily performed in  
57  
58  
59  
60



1  
2  
3  
4 the supine position, avoiding the additional pain from positioning the  
5  
6 patient for perioperative nerve block.<sup>73-76</sup> In theory, PENG block has  
7  
8 potential advantages over traditional forms of regional analgesia for pain  
9  
10 originating from the hip, as local anesthetic deposits in this target could  
11  
12 provide a wider and more complete block effect on the coverage area of  
13  
14 sensory nerves innervating the hip.<sup>77-87</sup> Thus, it has the potential advantage  
15  
16 of reducing postoperative pain without motor-blocking.<sup>88-91</sup> At present,  
17  
18 PENG block has been described as an easy to perform in the supine  
19  
20 position and as an effective and motor-sparing regional analgesia technique  
21  
22 for hip surgery.<sup>92-95</sup>

23  
24  
25  
26  
27  
28  
29  
30 The excellent analgesic benefit of PENG block for perioperative  
31  
32 analgesia in hip surgery was highlighted in a significant number of  
33  
34 publications of case reports, case series, reviews and retrospective studies  
35  
36  
37  
38  
39  
40  
41  
42  
43  
44  
45  
46  
47  
48  
49  
50  
51  
52  
53  
54  
55  
56  
57  
58  
59  
60  
Inadvertent quadriceps weakness was also reported in patients following  
the PENG block.<sup>96-98</sup> Due to the limited current clinical evidence, the  
efficacy and safety of the PENG block, particularly the efficacy of motor  
function preservation and the incidence of block-related adverse events  
remain controversial until now.<sup>99-103</sup>

Therefore, it is necessary to conduct a systematic review and meta-  
analysis to analyse the clinical efficacy of PENG block on perioperative  
pain management in elderly patients with hip diseases. The outcomes of

1  
2  
3  
4 this systematic review will provide evidence for better clinical decision  
5  
6 making and possible future directions for further clinical trials.  
7

## 8 9 **Objectives**

10  
11 We are performing this protocol of systematic review with meta-  
12 analysis and trial sequential analysis (TSA) of randomized clinical trials to  
13  
14 evaluate the clinical efficacy and safety of PENG block on perioperative  
15  
16 pain management in elderly patients with hip diseases.  
17  
18  
19  
20  
21

## 22 **METHODS AND ANALYSIS**

### 23 24 **Design and registration of the review**

25  
26 We devised this protocol according to the Preferred Reporting Items  
27 for Systematic Reviews and Meta-Analyses Protocols (PRISMA-P)  
28 guidelines that has been registered with PROSPERO 2022 (registration  
29 number: CRD42022313895).<sup>104</sup> We will perform this systematic review  
30 and meta-analysis based on the Cochrane Handbook and report the results  
31 following the PRISMA statement.<sup>105 106</sup> This study is anticipated to begin  
32 searching in August 2022 and will be complete in January 2023.  
33  
34  
35  
36  
37  
38  
39  
40  
41  
42  
43  
44

### 45 **Inclusion criteria for study selection**

#### 46 47 **Types of studies**

48  
49 Only randomized controlled trials (RCTs) involving the clinical  
50 efficacy of PENG block on perioperative pain management in elderly  
51 patients with hip diseases will be included. There will be no language  
52 restrictions.  
53  
54  
55  
56  
57  
58  
59  
60

1  
2  
3  
4 The exclusion criteria were as follows: (1) studies comparing PENG  
5 block versus PENG block combined with other analgesic techniques, or  
6 studies comparing PENG block under different guidance techniques  
7 (ultrasound guided or traditional landmark technique); (2) studies with data  
8 that could not be used for statistical analysis, or studies with incomplete  
9 data, or data that could not be extracted after contacting the original authors;  
10 and (3) studies that were duplicate publications, published as letters or  
11 editorials, abstracts from conferences, and reviews.  
12  
13  
14  
15  
16  
17  
18  
19  
20  
21  
22  
23  
24

### 25 **Types of participants**

26  
27 Elderly participants ( $\geq 65$  years old) with any kind of hip disease (such  
28 as hip fracture, hip osteoarthritis) accepting PENG block for perioperative  
29 pain management (including preoperative analgesia, intraoperative  
30 anesthesia management and postoperative analgesia) will be included.  
31 There will be no limitations on participants' gender, ethnicity, body mass  
32 index (BMI) or American Society of Anesthesiologists (ASA)  
33 classification.  
34  
35  
36  
37  
38  
39  
40  
41  
42  
43  
44

### 45 **Types of interventions/controls**

46  
47 The intervention group will be the participants who received any kind  
48 of PENG block (including ultrasound-guided, X-ray-guided, CT-guided or  
49 traditional landmark-based techniques), alone or in combination with any  
50 other kind of analgesia technique for perioperative pain management,  
51 while the control group will receive any kind of analgesia technique other  
52  
53  
54  
55  
56  
57  
58  
59  
60

1  
2  
3  
4 than PENG block for perioperative pain management.  
5

## 6 **Types of outcome measures**

### 7 **Primary outcomes**

8  
9  
10  
11 The primary outcome will be the pain intensity after perioperative  
12 pain management by PENG block or other analgesia techniques. Pain  
13 intensity, including preoperative pain intensity and postoperative pain  
14 intensity, assessed by visual analog scale (VAS) scores or numeric rating  
15 scale (NRS) scores will be included. Perioperative static and dynamic pain  
16 intensity after pain management will also be included if possible.  
17  
18  
19  
20  
21  
22  
23  
24  
25  
26

### 27 **Secondary outcomes**

- 28  
29  
30 **1. Perioperative quadriceps strength:** will be evaluated as follows if  
31 possible.  
32  
33  
34  
35 ➤ Incidence of quadriceps motor block (defined as paresis or paralysis of  
36 knee extension and hip adduction) [Knee extension was graded  
37 according to a 3-point scale: 0=normal strength (extension against  
38 gravity and against resistance)]; 1=paresis (extension against gravity  
39 but not against resistance); 2=paralysis (no extension possible).<sup>107</sup> Hip  
40 adduction scores of 0, 1, and 2 points indicated decreases in strength of  
41 0%-20%, 21%-70%, and 71%-90% compared with baseline  
42 measurement, respectively.<sup>108</sup>  
43  
44  
45  
46  
47  
48  
49  
50  
51  
52  
53  
54  
55  
56 ➤ Mobility of the quadriceps as defined by the Medical Research Council  
57 (MRC) scale.<sup>109</sup>  
58  
59  
60

- 1  
2  
3  
4 ➤ Quadriceps strength was assessed by measuring of the force produced  
5  
6 by voluntary isometric contractions with any type of reliable and valid  
7  
8 stationary dynamometer (such as the Chatillon DPPH-250 force gauge,  
9  
10 AMETEK, USA or Chatillon; AMETEK, Largo, Florida; Lafayette  
11  
12 Instrument, Lafayette, Indiana; and MicroFET, Hoggan Health  
13  
14 Industries, West Jordan, Utah).<sup>110 111</sup>  
15  
16  
17  
18

## 19 **2. Perioperative rescue analgesia information**

- 20  
21  
22 ➤ Perioperative cumulative analgesic consumption: cumulative analgesic  
23  
24 consumption for intraoperative anesthesia, and cumulative rescue  
25  
26 analgesics for preoperative/postoperative analgesia will be included if  
27  
28 possible. Any kind of analgesics, such as opioid analgesics and non-  
29  
30 steroidal analgesics administered by different delivery methods, such  
31  
32 as PCA (patient-controlled analgesia) devices, intravenous, oral, or  
33  
34 intramuscular will be included if possible.  
35  
36  
37  
38  
39  
40 ➤ Time to first analgesic request: time from end of preoperative pain  
41  
42 management procedure to first analgesic request or time from end of  
43  
44 surgery to first analgesic request will be included if possible.  
45  
46  
47

## 48 **3. Perioperative complications:** if possible

- 49  
50  
51 ➤ Block-related adverse events included vascular puncture, paresthesia,  
52  
53 any local anesthetic toxicity, anaphylaxis, permanent nerve injury,  
54  
55 bleeding or infection.  
56  
57  
58  
59  
60

- 1  
2  
3  
4 ➤ Intraoperative adverse effects included hypoxemia(oxygen saturation  
5  
6 less than 90% or oxygen partial arterial pressure $\leq$ 60 mmHg);  
7  
8 hypotension (defined as a decrease of  $>20\%$  from preanesthetic patient  
9  
10 baseline values or a systolic blood pressure less than 90 mmHg);  
11  
12 arrhythmia [including bradycardia (defined as HR  $<55$  beats/min);  
13  
14 tachycardia (defined as HR $>100$  beats/min); any other types of  
15  
16 arrhythmias]; and blood loss.  
17  
18  
19  
20  
21  
22 ➤ Other adverse effects, including postoperative nausea/vomiting,  
23  
24 pruritus, urinary retention, respiratory depression, sweating, dizziness,  
25  
26 pruritus, urticaria, postoperative arrhythmia and postoperative  
27  
28 pulmonary complications, were defined as the composite of any  
29  
30 respiratory infection, respiratory failure, pleural effusion, atelectasis,  
31  
32 or pneumothorax.  
33  
34  
35  
36

37  
38 **4. Patients' recovery:** Length of stay, recovery time (defined as time  
39  
40 until recovery room discharge criteria were met after surgery), the  
41  
42 quality of postoperative recovery score (such as the Quality of  
43  
44 Recovery-40 questionnaire) <sup>112</sup> and patients' ambulation (such as time-  
45  
46 to-first ambulation and initial ambulation distance) will be included if  
47  
48 possible.  
49  
50  
51

52  
53 **5. Patient satisfaction:**  
54

55  
56 Patient satisfaction with the performance of the perioperative pain  
57  
58 management techniques or postoperative analgesia will be included if  
59  
60

possible. Satisfaction could be measured by a 5-point Likert scale (1=very dissatisfied; 2=dissatisfied; 3=neutral; 4=satisfied; 5= very satisfied), 10-point Likert scale (1= completely unsatisfied; 10=completely satisfied) or a postoperative questionnaire whether the patient would choose the same anesthetic or analgesia handling by the answer of “yes” or “no”.<sup>113</sup>

### Exploratory outcomes

- 1. Perioperative sensory block:** Sensory block was evaluated using a 3-point scale [0=no block, 1=analgesia (patient can feel touch, not cold), 2=anesthesia (patient cannot feel touch)], which was assessed in the anterior, lateral and medial aspects of the mid-thigh.<sup>107</sup>
- 2. Block ended time:** defined as the return of motor (if initially impaired) and/or sensory function, which was acquired from patients’ recall.
- 3. Perioperative mortality** was defined as all-cause death during the operation procedure, within 30 days after surgery, or death during hospitalization.

### Search strategy

Two reviewers (Z-JQ and DL) will independently conduct the search and any disagreements will be resolved by consulting a third reviewer (Z-WY) as much as possible. English and Chinese electronic databases will be searched from inception to August 2022 for published literature. PubMed, Ovid Medline, Cochrane Library, Embase and Web of Science will be included in the English databases. The Chinese BioMedical

1  
2  
3  
4 Literature (Sino-Med), China National Knowledge Infrastructure (CNKI),  
5  
6 Wanfang database and VIP Database will be included in the Chinese  
7  
8 databases. The trial registry database (Clinical Trials.gov and WHO  
9  
10 International Clinical Trials Registry Platform) will also be scrutinized as  
11  
12 to avoid missing ongoing or unpublished clinical trials. In addition,  
13  
14 reference lists of each study will also be scanned for missing studies.  
15  
16  
17  
18

19 The following search terms will be used in the search strategy:  
20  
21 pericapsular nerve group block, PENG block, elderly, hip, and randomized  
22  
23 controlled trial. Related search terms will also be translated into Chinese  
24  
25 for literature research and study identification in Chinese databases. The  
26  
27 search strategies are listed in Supplementary Appendix file 1.  
28  
29 Comprehensive updating of the literature search results will be performed  
30  
31 prior to the final publication of systematic reviews to avoid missing  
32  
33 published studies during the systematic review preparation.  
34  
35  
36  
37  
38

## 39 **Data collection and analysis**

### 40 **Selection of studies**

41  
42  
43 At least two review authors (Z-JQ and DL) will be responsible for  
44  
45 screening the potentially eligible studies by reading titles and abstracts. All  
46  
47 identified and relevant full-text publications will be retrieved by screening  
48  
49 the full text thoroughly, and the reasons for exclusion of the ineligible  
50  
51 studies will be recorded. Any disagreement will be resolved through  
52  
53 discussion or by consulting a third review author (Z-JQ and CG) as much  
54  
55  
56  
57  
58  
59  
60



1  
2  
3  
4 as possible. A fourth reviewer (Z-WY) will check out all procedures  
5  
6 carefully prior to the final confirmation of the data extraction. Data  
7  
8 extraction will be performed by at least two authors, and a third author will  
9  
10 be consulted if there is any disagreement. Duplicate publications and  
11  
12 companion papers of the same trial will be assessed by all review authors.  
13  
14 The entire study selection process is displayed in the PRISMA flow  
15  
16 diagram (figure 1).  
17  
18  
19  
20  
21

## 22 **Data extraction**

23  
24 Two review authors (Z-JQ and ZL) will use a standardized data  
25  
26 collection form (Excel version 2013, Microsoft Inc, Washington DC, USA)  
27  
28 for data extraction from each included study. The data extraction form  
29  
30 included participants' demographic data, type of hip disease or hip surgery,  
31  
32 type of anesthesia: local, spinal or general anesthesia, period of  
33  
34 perioperative pain management (preoperative analgesia, intraoperative  
35  
36 anesthesia and postoperative analgesia), inclusion and exclusion criteria,  
37  
38 detailed information of analgesia techniques (type of perioperative  
39  
40 analgesia techniques: PENG block or other analgesia techniques; type,  
41  
42 concentration, dose, volume and adjuvant of local anesthetics), and any  
43  
44 kind of outcomes including primary, secondary, and exploratory outcomes.  
45  
46 Study design characteristics including: randomization method, allocation  
47  
48 concealment, blinding (patients, treatment providers, outcome  
49  
50 investigators), incomplete outcome data collection and statistical analysis,  
51  
52  
53  
54  
55  
56  
57  
58  
59  
60

and outcome reporting) will be recorded simultaneously. Continuous and dichotomous data will be recorded as the mean $\pm$  SD and the percentages or the proportion. If necessary, a third review author (D-XQ) will cross-check the data to ensure precision. When the necessary information or data for analysis were missing or incomplete, we will contact the corresponding author of the research via email for the original data as much as possible. Necessary numerical data in the graphs will be extracted by Adobe Photoshop if necessary.<sup>114</sup> Extracted information and data are presented in table 1.

**Table 1** Information and data extraction schedule

| Subject                 | Content                                                                                                                                                                                                                                                                                                                                                                                                                                        |
|-------------------------|------------------------------------------------------------------------------------------------------------------------------------------------------------------------------------------------------------------------------------------------------------------------------------------------------------------------------------------------------------------------------------------------------------------------------------------------|
| Publication information | Title; author; Publish year; Country of origin; Corporate sponsorship; Contact email.                                                                                                                                                                                                                                                                                                                                                          |
| Participant             | Sample size; Age; Sex; Height and weight or BMI; ASA physical status classification levels; Type of hip disease or hip surgery; Inclusion and exclusion criteria if necessary.                                                                                                                                                                                                                                                                 |
| Intervention            | Detail information of PENG block techniques (guidance techniques; target area of block; block needle; needle tracking techniques: in-plane and out-of-plane) Detail information of local anesthetics (type, concentration, dose, volume and adjuvant of local anesthetics).                                                                                                                                                                    |
| Control                 | Detail information of block analgesia techniques (including guidance techniques; target area of block; block needle; needle tracking techniques: in-plane and out-of-plane; detail information of local anesthetics including type, concentration, dose, volume and adjuvant of local anesthetics) and non-block analgesia techniques (including type, dose, and administration method of analgesics).                                         |
| Outcome                 | Primary outcome (pain intensity after perioperative pain management); Secondary outcome measurements (perioperative quadriceps strength; perioperative rescue analgesia information: perioperative cumulative analgesic consumption; time to first analgesic request; patients' recovery; perioperative complications; patients' satisfaction); Exploratory outcomes (perioperative sensory block; block ended time; perioperative mortality). |
| Study design            | Randomization method; Blinding; Allocation concealment; Statistical analysis; Sample size calculation; Outcome reporting.                                                                                                                                                                                                                                                                                                                      |
| Other information       | Type of anesthesia: local, spinal or general anesthesia; Period of perioperative pain management (preoperative analgesia, intraoperative anesthesia and postoperative                                                                                                                                                                                                                                                                          |

analgesia); Anesthesia time; Operation time; Assessment method or equipment of outcomes.

## Quality assessment

The risk of bias in each included study will be assessed independently by two review authors (DL and ZL) under the guidance of the Cochrane risk of bias tool.<sup>115</sup> Methodology including random sequence generation, allocation concealment, blinding of participants and personnel, blinding of outcome assessment, incomplete outcome data, selective outcome reporting, other risks of bias and overall risk of bias will be evaluated. Each included study will be assessed by the risk of bias assessment tool from the Cochrane Handbook for Systematic Reviews of Interventions and then categorized into three levels (low risk of bias, unclear of bias and high risk of bias).<sup>105,116,117</sup> Any discrepancies will be settled through discussions by all review authors or arbitration of third reviewer (Z-WY). Assessment of risk of bias is listed in Supplementary Appendix file 2.

## Measures of treatment effect

Mean differences (MDs) with 95% confidence intervals (CIs) will be used for continuous outcome data reported by the same scale, and standardized mean differences (SMDs) with 95% confidence intervals (CIs) will be used for continuous outcome data reported by different scales. The relative risks (RRs) with 95% CIs will be used for dichotomous outcome data.

## Assessment of heterogeneity

1  
2  
3  
4 Application of a fixed-effects model or random-effects models based  
5  
6 on statistical heterogeneity is not recommended by the Cochrane  
7  
8 guidelines.<sup>105</sup> Assessment of heterogeneity will be primarily inspected by  
9  
10 forest plots. If there is no indication of funnel plot asymmetry, a random-  
11  
12 effects meta-analysis will be performed.<sup>105</sup> If there is an indication of  
13  
14 funnel plot asymmetry, then both a fixed-effect and a random-effect meta-  
15  
16 analysis are problematic. In this situation, a sensitivity analysis will be  
17  
18 performed by excluding small studies or meta-regression will be addressed  
19  
20 directly. A P value <0.05 was assumed to be statistically significant.  
21  
22  
23  
24  
25  
26

### 27 **Trial Sequential Analysis**

28  
29  
30 The required information size (RIS) will be calculated to correct the  
31  
32 risks of random errors by trial sequential analysis (TSA) using the TSA  
33  
34 program version 0.9.5.10 Beta (Copenhagen Trial Unit, Copenhagen,  
35  
36 Denmark).<sup>118-120</sup> TSA program version is available at  
37  
38 <http://www.ctu.dk/tsa>.<sup>121</sup> Each outcome will be detected by RIS, the  
39  
40 cumulative Z-curve and the TSA monitoring boundaries.<sup>122 123</sup>  
41  
42  
43  
44  
45

46 For continuous outcomes, the observed SD, a mean difference of the  
47  
48 observed SD/2 (clinically meaningful value), an alpha (type I error) of 2.5%  
49  
50 and a beta (type II error) of 10% will be used in the TSA.<sup>124</sup> For  
51  
52 dichotomous outcomes, the proportion or percentage from the control  
53  
54 group, a relative risk variation of 20% (clinically meaningful value), an  
55  
56 alpha (type I error) of 2.5% and a beta (type II error) of 10% will be used  
57  
58  
59  
60

1  
2  
3  
4 in the TSA.<sup>125</sup>  
5

## 6 **Subgroup analysis** 7

8  
9 The results will be comprehensively interpreted through an analysis  
10 of subgroups or subsets as much as possible. If sufficient trials are available,  
11 data from different participants' ages, different types of hip disease or  
12 surgery, pain management during different perioperative periods, different  
13 pain management techniques in the control group, and different types of  
14 anesthesia will be analysed independently.  
15  
16  
17  
18  
19  
20  
21  
22  
23

24 ▶ Different participants' ages (PENG block for perioperative analgesia in  
25 elderly patients with different ages as follows: 65 years ≤ Patients < 75 years;  
26 75 years ≤ Patients < 80 years; Patients ≥ 80 years).  
27  
28  
29

30  
31  
32 ▶ Different types of hip disease or surgery (hip disease, such as hip  
33 fracture and hip osteoarthritis; hip surgery such as hip arthroplasty, hip  
34 fracture fixation and hip arthroscopy procedures).  
35  
36  
37  
38

39  
40 ▶ Pain management of different perioperative periods (PENG block for  
41 preoperative analgesia, intraoperative anesthesia and postoperative  
42 analgesia).  
43  
44  
45  
46  
47

48 ▶ Different pain management techniques in the control group (such as  
49 block analgesia techniques, including lumbar plexus block, femoral nerve  
50 block, fascia-iliac compartment block, 3-in-1 femoral nerve block, sacral  
51 plexus block, obturator and sciatic nerve block, and quadratus lumborum  
52 block. Non-block analgesia techniques such as opioid and no-opioid  
53  
54  
55  
56  
57  
58  
59  
60

analgesics).

► Different types of anesthesia (such as local anesthesia, spinal anesthesia or general anesthesia).

The interaction p value will be considered to test the statistically significant subgroup difference; if testing for interaction  $p < 0.05$  (a significant difference between subgroups exists), the results for individual subgroups will be reported separately.<sup>105</sup>

### **Sensitivity analysis**

Sensitivity analysis will be applied after the analysis of subgroups or subsets as to evaluate the stability of the combined results, which could be affected by uncertain assumptions of data and usage. Significant changes in the pooled results may indicate significant heterogeneity in the included studies. Low-quality studies defined as high risk of bias studies according to the Cochrane risk of bias tool assessment will be excluded, and then re-analysis of the included studies will be performed to detect the existence of obvious differences between the combined effects. The stability of the pooled estimations will be detected by removing each included study one by one if necessary.

### **Assessment of publication biases**

Egger's regression test and funnel plot analysis will be performed to estimate the potential publication bias, while more than 10 original studies involved an outcome.<sup>126 127</sup> The symmetric pattern of the funnel plot by

1  
2  
3  
4 trim-and-fill analysis will also be used to confirm the potential publication  
5  
6 bias. The effect sizes of each included study will be normally  
7  
8 symmetrically distributed around the center of a funnel plot in the absence  
9  
10 of publication bias.<sup>128</sup> Publication biases will be detected by Stata/MP 16.0  
11  
12 (Stata Corp, College Station, TX, USA).  
13  
14  
15

### 16 **Grading the quality of evidence**

17  
18  
19 The quality of evidence for each outcome will be assessed using the  
20  
21 Grading of Recommendations Assessment, Development and Evaluation  
22  
23 (GRADE) criteria.<sup>129</sup> The quality of effect estimates will be classified as  
24  
25 high, moderate, low or very low depending on the risk of bias, consistency,  
26  
27 directness, precision and publication bias.<sup>129</sup> Data from randomized  
28  
29 controlled trials are classified as high quality evidence according to  
30  
31 GRADE, but it can be degraded according to risk of bias, imprecision,  
32  
33 inconsistency, indirectness or publication bias.  
34  
35  
36  
37  
38  
39

### 40 **Patient and public involvement statement**

41  
42  
43 Patients or the public were not involved in the design, conduct,  
44  
45 reporting, or dissemination plans of our research.  
46  
47

## 48 **DISCUSSION**

49  
50  
51 More and more elderly patients suffer from hip diseases in the global  
52  
53 accelerating ageing process. As the main therapy for hip diseases, hip  
54  
55 surgery is often associated with moderate to severe perioperative pain. An  
56  
57 Optimal perioperative analgesia can decrease the risk of perioperative  
58  
59  
60

1  
2  
3  
4 complications and facilitate elderly patient perioperative recovery. Opioid  
5  
6 analgesics are often selected hesitantly as opioid-related complications,  
7  
8 which can delay patient recovery and discharge. Regional anesthesia and  
9  
10 analgesic techniques for perioperative pain management have gradually  
11  
12 become the clinical focus in elderly patients with hip diseases as to  
13  
14 facilitate patient recovery. A simple, easy-to-perform, adequate analgesia  
15  
16 and motor-sparing regional analgesia technique is the ideal regional  
17  
18 analgesia technique for perioperative pain management of hip diseases.  
19  
20  
21  
22  
23

24  
25 The PENG block is a relatively new, easy-to-perform, analgesia  
26  
27 adequate, and motor-sparing peripheral nerve block technique. The benefit  
28  
29 of PENG block for perioperative analgesia in hip surgery was based on a  
30  
31 significant number of publications of case reports, case series, reviews and  
32  
33 retrospective studies, but prospective and randomized controlled trials are  
34  
35 rare. Due to the limited current clinical evidence, the efficacy and safety of  
36  
37 the PENG block remain unclear.  
38  
39  
40  
41  
42

43  
44 This systematic review will provide an overview of the current state  
45  
46 of evidence on the clinical efficacy and safety of the PENG block for  
47  
48 perioperative analgesia in the elderly patients with hip disease. We will  
49  
50 examine the perioperative analgesia efficacy, the advantage of motor  
51  
52 function preservation and the incidence of block-related adverse events of  
53  
54 PENG block. The results of this systematic review will facilitate clinical  
55  
56 decision making on better perioperative pain management of elderly  
57  
58  
59  
60



1  
2  
3  
4 patients with hip disease.  
5

6 This systematic review protocol was rigorously performed according  
7 to the Preferred Reporting Items for Systematic Review and Meta-  
8 Analyses Protocols (PRISMA-P) guidelines. The strengths of our  
9 systematic review are as follows: First, a comprehensive literature search  
10 of English and Chinese databases will be performed. Second, we will  
11 perform multivariable analysis (including subgroup analysis, trial  
12 sequential analysis for random errors; sensitivity analysis, study quality  
13 assessment, funnel plots and Egger's regression test for publication bias)  
14 to improve the quality of the evidence. Third, literature retrieval, data  
15 extraction, and study quality assessment will be performed independently  
16 according to the guidelines by at least two review authors. Any  
17 disagreement will be resolved through discussion or by consulting another  
18 review author as much as possible.  
19  
20  
21  
22  
23  
24  
25  
26  
27  
28  
29  
30  
31  
32  
33  
34  
35  
36  
37  
38  
39

40 Limitations are as follows: First, studies with different perioperative  
41 periods, hip diseases or hip surgeries will be included, leading to potential  
42 heterogeneity. Second, PENG block is a relatively new peripheral nerve  
43 block technique, so the sample size of each included study may be limited,  
44 and the number of studies with available data for subgroup analyses may  
45 be small. Third, studies with high-level evidence such as well-designed  
46 randomized controlled trials with double-blind designs may be limited, as  
47 it is difficult to perform blinding for different block techniques in different  
48  
49  
50  
51  
52  
53  
54  
55  
56  
57  
58  
59  
60

puncture positions. Fourth, PENG block is a relatively new peripheral nerve block technique, and it is difficult to define a significant clinical plausible value of mean difference and relative risk increase/decrease during literature research or the clinical experience. Therefore, a significant clinical plausible value will be defined according to TSA guidelines.

## **ETHICS AND DISSEMINATION**

Ethical approval was not required for this systematic review protocol. The findings will be disseminated through peer-reviewed publications.

### **Timelines**

Formal screening of search results will begin in August 2022. Data extraction will begin in November 2022. The project will be complete in January 2023.

### **Author Contributions**

Z-JQ and DL conceived the idea for this systematic review. All authors (Z-JQ, DL, CG, ZL, D-XQ, Z-WY) developed the methodology for the systematic review. The manuscript was drafted by Z-JQ and DL, and revised by all authors. CG and Z-WY will screen potential studies, and perform duplicate independent data abstraction. Z-JQ and ZL will undertake risk of bias assessment and assess the evidence quality. Z-JQ and DL will conduct the data synthesis. All authors contributed to the research and agreed to be responsible for all aspects of the work.

## Funding

None.

## Competing interests

None declared.

## Data availability statement

Not applicable for this protocol.

## Patient consent for publication

No patient was involved.

## Provenance and peer review

Not commissioned; externally peer reviewed.

## REFERENCES

- 1 World Health Organization. Ageing and health. 2020. <https://www.who.int/news-room/fact-sheets/detail/ageing-and-health>. Accessed May 28, 2022.
- 2 Centers for Disease Control and Prevention. Injury prevention & control: hip fractures among older adults. <https://www.cdc.gov/falls/hip-fractures.html>. Accessed May 28, 2022.
- 3 Katz JN, Arant KR, Loeser RF. Diagnosis and Treatment of Hip and Knee Osteoarthritis: A Review. *JAMA* 2021; 325:568-78.
- 4 Fu M, Zhou H, Li Y, *et al*. Global, regional, and national burdens of hip osteoarthritis from 1990 to 2019: estimates from the 2019 Global Burden of Disease Study. *Arthritis Res Ther* 2022; 24:8.
- 5 Hasan K, Shankar S, Sharma A, *et al*. Hip surgery and its evidence base: progress over a decade? *J Orthop Traumatol* 2016;17: 291-95.
- 6 Antoniou J, Silotch C, Epure LL, *et al*. Elective Total Hip Arthroplasties in Nonagenarians-Age Does Matter: A National Surgical Quality Improvement Program Study. *J Arthroplasty* 2022: S0883-5403(22)00084-5.
- 7 Cui L, Zhao S, Tian H, *et al*. Curative efficacy of surgical procedures for older patients

- 1  
2  
3  
4 with femoral neck fracture: a network meta-analysis and systematic review. *J Orthop*  
5 *Surg Res* 2022; 17:127.  
6  
7  
8 8 Cross GWV, Sobti AS, Khan T. Hip arthroscopy in osteoarthritis: Is it an option? *J Clin*  
9 *Orthop Trauma* 2021; 22:101617.  
10  
11 9 Morrison C, Brown B, Lin DY, *et al.* Analgesia and anesthesia using the pericapsular  
12 nerve group block in hip surgery and hip fracture: a scoping review. *Reg Anesth Pain*  
13 *Med* 2021; 46: 169-75.  
14  
15  
16 10 Abou-Setta AM, Beaupre LA, Rashid S, *et al.* Comparative effectiveness of pain  
17 management interventions for hip fracture: a systematic review. *Ann Intern Med* 2011;  
18 155: 234-45.  
19  
20  
21 11 Orozco S, Muñoz D, Jaramillo S, *et al.* Pericapsular nerve group (PENG) block for  
22 perioperative pain control in hip arthroscopy. *J Clin Anesth* 2020; 59:3-4.  
23  
24  
25 12 Bozic KJ, Chan V, Valone FH 3rd, *et al.* Trends in hip arthroscopy utilization in the  
26 United States. *J Arthroplast* 2013; 28:140-43.  
27  
28  
29 13 Bech NH, Hulst AH, Spuijbroek JA, *et al.* Perioperative pain management in hip  
30 arthroscopy; What options are there? *J Hip Preserv Surg* 2016; 3:181-9.  
31  
32  
33 14 Gan TJ. Poorly controlled postoperative pain: prevalence, consequences, and  
34 prevention. *J Pain Res* 2017;10: 2287-98.  
35  
36  
37 15 Pozek JJ, De Ruyter M, Khan TW. Comprehensive Acute Pain Management in the  
38 Perioperative Surgical Home. *Anesthesiol Clin* 2018;36: 295-307.  
39  
40  
41 16 Tsinaslanidis G, Tsinaslanidis P, Mahajan RH. Perioperative Pain Management in  
42 Patients Undergoing Total Hip Arthroplasty: Where Do We Currently Stand? *Cureus*  
43 2020; 12: e9049.  
44  
45  
46 17 Pepper AM, Mercuri JJ, Behery OA, *et al.* Total Hip and Knee Arthroplasty  
47 Perioperative Pain Management: What Should Be in the Cocktail. *JBJS Rev* 2018; 6:  
48 e5.  
49  
50  
51 18 Pyati S, Gan TJ. Perioperative pain management. *CNS Drugs* 2007; 21:185-211.  
52  
53  
54 19 Morrison RS, Magaziner J, Gilbert M, *et al.* Relationship between pain and opioid  
55 analgesics on the development of delirium following hip fracture. *J Gerontol A Biol Sci*  
56 *Med Sci* 2003; 58:76e81.  
57  
58  
59  
60

- 1  
2  
3  
4 20 Feldt KS, Oh HL. Pain and hip fracture outcomes for older adults. *Orthop Nurs* 2000;  
5 19:35e44.  
6  
7  
8 21 Roche JJ, Wenn RT, Sahota O, *et al.* Effect of comorbidities and postoperative  
9 complications on mortality after hip fracture in elderly people: prospective  
10 observational cohort study. *BMJ* 2005; 331:1374.  
11  
12  
13 22 Shellito AD, Dworsky JQ, Kirkland PJ, *et al.* Perioperative Pain Management Issues  
14 Unique to Older Adults Undergoing Surgery: A Narrative Review. *Ann Surg Open*  
15 2021;2: e072.  
16  
17  
18 23 Tan M, Law LS, Gan TJ. Optimizing pain management to facilitate Enhanced  
19 Recovery After Surgery pathways. *Can J Anaesth* 2015; 62:203-18.  
20  
21  
22  
23 24 Ranawat AS, Ranawat CS. Pain management and accelerated rehabilitation for total  
24 hip and total knee arthroplasty. *J Arthroplasty* 2007; 22:12-5.  
25  
26  
27 25 Wan HY, Li SY, Ji W, *et al.* Fascia Iliaca Compartment Block for Perioperative Pain  
28 Management of Geriatric Patients with Hip Fractures: A Systematic Review of  
29 Randomized Controlled Trials. *Pain Res Manag* 2020; 2020:8503963.  
30  
31  
32  
33 26 Wang S, Zhang T, Wang P, *et al.* The Impact of Perioperative Multimodal Pain  
34 Management on Postoperative Outcomes in Patients (Aged 75 and Older) Undergoing  
35 Short-Segment Lumbar Fusion Surgery. *Pain Res Manag* 2022; 2022:9052246.  
36  
37  
38 27 Baer M, Neuhaus V, Pape HC, *et al.* Influence of mobilization and weight bearing on  
39 in-hospital outcome in geriatric patients with hip fractures. *SICOT J* 2019; 5:4.  
40  
41  
42 28 Guerra ML, Singh PJ, Taylor NF. Early mobilization of patients who have had a hip or  
43 knee joint replacement reduces length of stay in hospital: a systematic review. *Clin*  
44 *Rehabil* 2015; 29:844-54.  
45  
46  
47  
48 29 Okamoto T, Ridley RJ, Edmondston SJ, *et al.* Day-of Surgery Mobilization Reduces  
49 the Length of Stay After Elective Hip Arthroplasty. *J Arthroplasty* 2016; 31:2227-30.  
50  
51  
52 30 Pepper AM, Mercuri JJ, Behery OA, *et al.* Total Hip and Knee Arthroplasty  
53 Perioperative Pain Management: What Should Be in the Cocktail. *JBJS Rev* 2018;6:  
54 e5.  
55  
56  
57  
58 31 Ruel M, Boussat B, Boudissa M, *et al.* Management of preoperative pain in elderly  
59 patients with moderate to severe cognitive deficits and hip fracture: a retrospective,  
60

- 1  
2  
3  
4 monocentric study in an orthogeriatric unit. *BMC Geriatr* 2021; 21:575.
- 5  
6 32 Bech NH, Hulst AH, Spuijbroek JA, *et al.* Perioperative pain management in hip  
7 arthroscopy; what options are there? *J Hip Preserv Surg* 2016; 3:181-9.
- 8  
9  
10 33 Karam JA, Schwenk ES, Parvizi J. An Update on Multimodal Pain Management After  
11 Total Joint Arthroplasty. *J Bone Joint Surg Am* 2021; 103:1652-62.
- 12  
13  
14 34 Baker DW. History of The Joint Commission's Pain Standards: Lessons for Today's  
15 Prescription Opioid Epidemic. *JAMA* 2017; 317: 1117-18.
- 16  
17  
18 35 El Moheb M, Mokhtari A, Han K, *et al.* Pain or No Pain, We Will Give You Opioids:  
19 Relationship Between Number of Opioid Pills Prescribed and Severity of Pain after  
20 Operation in US vs Non-US Patients. *J Am Coll Surg* 2020; 231:639-48.
- 21  
22  
23 36 Loh FE, Herzig SJ. Pain in the United States: Time for a Culture Shift in Expectations,  
24 Messaging, and Management. *J Hosp Med* 2019;14: 787-88.
- 25  
26  
27 37 Hyland SJ, Brockhaus KK, Vincent WR, *et al.* Perioperative Pain Management and  
28 Opioid Stewardship: A Practical Guide. *Healthcare (Basel)* 2021; 9:333.
- 29  
30  
31 38 Oderda GM, Senagore AJ, Morland K, *et al.* Opioid-related respiratory and  
32 gastrointestinal adverse events in patients with acute postoperative pain: prevalence,  
33 predictors, and burden. *J Pain Palliat Care Pharmacother* 2019; 33:82-97.
- 34  
35  
36 39 Kane-Gill SL, Rubin EC, Smithburger PL, *et al.* The cost of opioid-related adverse drug  
37 events. *J Pain Palliat Care Pharmacother*. 2014; 28:282-93.
- 38  
39  
40 40 Oderda GM, Said Q, Evans RS, *et al.* Opioid-related adverse drug events in surgical  
41 hospitalizations: impact on costs and length of stay. *Ann Pharmacother* 2007; 41:400-  
42 6.
- 43  
44  
45 41 Brat GA, Agniel D, Beam A, *et al.* Postsurgical prescriptions for opioid naive patients  
46 and association with overdose and misuse: retrospective cohort study. *BMJ* 2018; 360:  
47 j5790.
- 48  
49  
50 42 Brummett CM, Waljee JF, Goesling J, *et al.* New Persistent Opioid Use After Minor  
51 and Major Surgical Procedures in US Adults. *JAMA Surg* 2017;152: e170504.
- 52  
53  
54 43 Chau DL, Walker V, Pai L, *et al.* Opiates and elderly: use and side effects. *Clin Interv*  
55 *Aging* 2008; 3:273.
- 56  
57  
58 44 Gazelka HM, Leal JC, Lapid MI, *et al.* Opioids in Older Adults: Indications, Prescribing,  
59  
60

- 1  
2  
3  
4 Complications, and Alternative Therapies for Primary Care. *Mayo Clin Proc* 2020;  
5 95:793-800.  
6  
7  
8 45 Bitsch M, Foss N, Kristensen B, *et al.* Pathogenesis of and management strategies  
9 for postoperative delirium after hip fracture: a review. *Acta Orthop Scand* 2004;  
10 75:378-89.  
11  
12  
13 46 Amador LF, Goodwin JS. Postoperative delirium in the older patient. *J Am Coll Surg*  
14 2005; 200:767-73.  
15  
16  
17 47 Bicket MC, Brat GA, Hutfless S, *et al.* Optimizing opioid prescribing and pain treatment  
18 for surgery: Review and conceptual framework. *Am J Health Syst Pharm* 2019 Sep  
19 3;76(18):1403-1412.  
20  
21  
22  
23 48 Pasero CL, McCaffery M. Reluctance to order opioids in elders. *Am J Nurs* 1997;  
24 97:20-23.  
25  
26  
27 49 Chia PA, Cannesson M, Bui CCM. Opioid free anesthesia: feasible? *Curr Opin*  
28 *Anesthesiol* 2020; 33:512-17.  
29  
30  
31 50 Kharasch ED, Avram MJ, Clark JD. Rational Perioperative Opioid Management in the  
32 Era of the Opioid Crisis. *Anesthesiology* 2020;132: 603-05.  
33  
34  
35 51 Larach DB, Hah JM, Brummett CM. Perioperative Opioids, the Opioid Crisis, and the  
36 Anesthesiologist. *Anesthesiology* 2022; 136:594-608.  
37  
38  
39 52 Everson M, McLain N, Collins MJ, *et al.* Perioperative Pain Management Strategies in  
40 the Age of an Opioid Epidemic. *J Perianesth Nurs* 2020; 35:347-52.  
41  
42  
43 53 Bugada D, Bellini V, Lorini LF, *et al.* Update on Selective Regional Analgesia for Hip  
44 Surgery Patients. *Anesthesiol Clin* 2018; 36:403-15.  
45  
46  
47 54 68. Hogan MV, Grant RE, Lee L Jr. Analgesia for total hip and knee arthroplasty: a  
48 review of lumbar plexus, femoral, and sciatic nerve blocks. *American Journal of*  
49 *Orthopedics* 2009; 38: E129–E133.  
50  
51  
52 55 Foss NB, Kristensen BB, Bundgaard M, *et al.* Fascia iliaca compartment blockade for  
53 acute pain control in hip fracture patients: a randomized, placebo-controlled trial.  
54 *Anesthesiology* 2007; 106:773-78.  
55  
56  
57 56 Haines L, Dickman E, Ayvazyan S, *et al.* Ultrasound-guided fascia iliaca compartment  
58 block for hip fractures in the emergency department. *J Emerg Med* 2012; 43:692-97.  
59  
60

- 1  
2  
3  
4 57 Unneby A, Svensson O, Gustafson Y, *et al.* Femoral nerve block in a representative  
5 sample of elderly people with hip fracture: a randomised controlled trial. *Injury* 2017;  
6 48:1542-49.  
7  
8  
9 58 Beaudoin FL, Haran JP, Liebmann O. A comparison of ultrasound-guided three-in-  
10 one femoral nerve block versus parenteral opioids alone for analgesia in emergency  
11 department patients with hip fractures: a randomized controlled trial. *Acad Emerg Med*  
12 2013; 20: 584-91.  
13  
14  
15 59 Desmet M, Vermeylen K, Van Herreweghe I, *et al.* A longitudinal Supra-Inguinal fascia  
16 Iliaca compartment block reduces morphine consumption after total hip arthroplasty.  
17 *Reg Anesth Pain Med* 2017;42: 327-33.  
18  
19  
20 60 Gasanova I, Alexander JC, Estrera K, *et al.* Ultrasound-Guided suprainguinal fascia  
21 iliaca compartment block versus periarticular infiltration for pain management after total  
22 hip arthroplasty: a randomized controlled trial. *Reg Anesth Pain Med* 2019;44:206-11.  
23  
24  
25 61 Kuchálik J, Magnuson A, Lundin A, *et al.* Local infiltration analgesia or femoral nerve  
26 block for postoperative pain management in patients undergoing total hip arthroplasty.  
27 A randomized, double-blind study. *Scand J Pain* 2017; 16:223-30.  
28  
29  
30 62 Gasanova I, Alexander JC, Estrera K, *et al.* Ultrasound-Guided suprainguinal fascia  
31 iliaca compartment block versus periarticular infiltration for pain management after total  
32 hip arthroplasty: a randomized controlled trial. *Reg Anesth Pain Med* 2019;44: 206-  
33 11.  
34  
35  
36 63 Behrends M, Yap EN, Zhang AL, *et al.* Preoperative fascia Iliaca block does not  
37 improve analgesia after arthroscopic hip surgery, but causes quadriceps muscles  
38 weakness: a randomized, double-blind trial. *Anesthesiology* 2018;129: 536-43.  
39  
40  
41 64 Johnson RL, Kopp SL, Hebl JR, *et al.* Falls and major orthopaedic surgery with  
42 peripheral nerve blockade: a systematic review and meta-analysis. *Br J Anaesth* 2013;  
43 110:518-28.  
44  
45  
46 65 Gadsden JC, Lindenmuth DM, Hadzic A, *et al.* Lumbar plexus block using high-  
47 pressure injection leads to contralateral and epidural spread. *Anesthesiology* 2008;  
48 109:683-88.  
49  
50  
51  
52  
53  
54  
55  
56  
57  
58  
59  
60



- 1  
2  
3  
4 66 Brixel SM, Biboulet P, Swisser F, *et al.* Posterior quadratus lumborum block in total  
5 hip arthroplasty: a randomized controlled trial. *Anesthesiology* 2021;134: 722-33.  
6  
7 67 Kukreja P, MacBeth L, Sturdivant A, *et al.* Anterior quadratus lumborum block  
8 analgesia for total hip arthroplasty: a randomized, controlled study. *Reg Anesth Pain*  
9 *Med* 2019; 44: rapm-2019-100804-9.  
10  
11 68 Jadon A, Kedia SK, Dixit S, *et al.* Comparative evaluation of femoral nerve block and  
12 intravenous fentanyl for positioning during spinal anaesthesia in surgery of femur  
13 fracture. *Indian J Anaesth* 2014; 58:705-8.  
14  
15 69 Birnbaum K, Prescher A, Hessler S, *et al.* The sensory innervation of the hip joint—an  
16 anatomical study. *Surg Radiol Anat* 1997; 19: 371-5.  
17  
18 70 Short AJ, Barnett JJG, Gofeld M, *et al.* Anatomic Study of Innervation of the Anterior  
19 Hip Capsule: Implication for Image-Guided Intervention. *Reg Anesth Pain Med* 2018;  
20 43:186-92.  
21  
22 71 Gerhardt M, Johnson K, Atkinson R, *et al.* Characterisation and classification of the  
23 neural anatomy in the human hip joint. *Hip Int* 2012; 22:75-81.  
24  
25 72 Giron-Arango L, Peng PWH, Chin KJ, *et al.* Pericapsular nerve group (PENG) block  
26 for hip fracture. *Reg Anesth Pain Med* 2018; 43: 859-63.  
27  
28 73 Acharya U, Lamsal R. Pericapsular Nerve Group Block: An Excellent Option for  
29 Analgesia for Positional Pain in Hip Fractures. *Case Rep Anesthesiol* 2020;  
30 2020:1830136.  
31  
32 74 Jadon A, Mohsin K, Sahoo RK, *et al.* Comparison of supra-inguinal fascia iliaca versus  
33 pericapsular nerve block for ease of positioning during spinal anaesthesia: A  
34 randomised double-blinded trial. *Indian J Anaesth* 2021; 65:572-78.  
35  
36 75 Sahoo RK, Jadon A, Sharma SK, *et al.* Peri-capsular nerve group block provides  
37 excellent analgesia in hip fractures and positioning for spinal anaesthesia: A  
38 prospective cohort study. *Indian J Anaesth* 2020; 64:898-900.  
39  
40 76 Mistry T, Sonawane K, Raghuvanshi A, *et al.* Preemptive pericapsular nerve group  
41 block to facilitate sitting position for neuraxial anesthesia in patients with acetabular  
42 fractures: A case series. *Saudi J Anaesth* 2022; 16:221-25.  
43  
44  
45  
46  
47  
48  
49  
50  
51  
52  
53  
54  
55  
56  
57  
58  
59  
60

- 1  
2  
3  
4 77 Orozco S, Muñoz D, Jaramillo S, *et al.* Pericapsular Nerve Group (PENG) block for  
5 perioperative pain control in hip arthroscopy. *J Clin Anesth* 2020; 59:3-4.  
6  
7  
8 78 Morrison C, Brown B, Lin DY, *et al.* Analgesia and anesthesia using the pericapsular  
9 nerve group block in hip surgery and hip fracture: a scoping review. *Reg Anesth Pain*  
10 *Med* 2021; 46:169-75.  
11  
12  
13 79 Kukreja P, Avila A, Northern T, *et al.* A Retrospective Case Series of Pericapsular  
14 Nerve Group (PENG) Block for Primary Versus Revision Total Hip Arthroplasty  
15 Analgesia. *Cureus* 2020;12: e8200.  
16  
17  
18 80 Mysore K, Sancheti SA, Howells SR, *et al.* Postoperative analgesia with pericapsular  
19 nerve group (PENG) block for primary total hip arthroplasty: a retrospective study. *Can*  
20 *J Anaesth* 2020;67: 1673-74.  
21  
22  
23  
24 81 Kinjo S, Zhang AL. Rescue Pericapsular Nerve Group Block for Hip Arthroscopy: A  
25 Report of 3 Cases. *A A Pract* 2022;16: e01553.  
26  
27  
28 82 Fernicola, Jacob Tannehill I, Tucker CJ, *et al.* The Pericapsular Nerve Group Block  
29 for Perioperative Pain Management for Hip Arthroscopy. *Arthrosc Tech* 2021; 10:  
30 e1799-e1803.  
31  
32  
33  
34 83 Rocha-Romero A, Arias-Mejia K, Salas-Ruiz A, *et al.* Pericapsular nerve group (PENG)  
35 block for hip fracture in the emergency department: a case series. *Anaesth Rep*  
36 2021;9: 97-100.  
37  
38  
39  
40 84 Natrajan P, Bhat RR, Remadevi R, *et al.* Comparative Study to Evaluate the Effect of  
41 Ultrasound-Guided Pericapsular Nerve Group Block Versus Fascia Iliaca  
42 Compartment Block on the Postoperative Analgesic Effect in Patients Undergoing  
43 Surgeries for Hip Fracture under Spinal Anesthesia. *Anesth Essays Res* 2021; 15:285-  
44 89.  
45  
46  
47  
48 85 Mosaffa F, Taheri M, Manafi Rasi A, *et al.* Comparison of pericapsular nerve group  
49 (PENG) block with fascia iliaca compartment block (FICB) for pain control in hip  
50 fractures: A double-blind prospective randomized controlled clinical trial. *Orthop*  
51 *Traumatol Surg Res* 2022; 108:103135.  
52  
53  
54  
55  
56  
57  
58  
59  
60

- 1  
2  
3  
4 86 Aliste J, Layera S, Bravo D, *et al.* Randomized comparison between pericapsular  
5 nerve group (PENG) block and suprainguinal fascia iliaca block for total hip  
6 arthroplasty. *Reg Anesth Pain Med* 2021; 46:874-78.  
7  
8  
9 87 Zheng J, Pan D, Zheng B, *et al.* Preoperative pericapsular nerve group (PENG) block  
10 for total hip arthroplasty: a randomized, placebo-controlled trial. *Reg Anesth Pain Med*  
11 2022; 47:155-60.  
12  
13  
14 88 Hua H, Xu Y, Jiang M, *et al.* Evaluation of Pericapsular Nerve Group (PENG) Block  
15 for Analgesic Effect in Elderly Patients with Femoral Neck Fracture Undergoing Hip  
16 Arthroplasty. *J Healthc Eng* 2022; 2022:7452716.  
17  
18  
19 89 Pascarella G, Costa F, Del Buono R, *et al*; collaborators. Impact of the pericapsular  
20 nerve group (PENG) block on postoperative analgesia and functional recovery  
21 following total hip arthroplasty: a randomised, observer-masked, controlled trial.  
22 *Anaesthesia* 2021; 76: 1492-98.  
23  
24  
25 90 Lin DY, Brown B, Morrison C, *et al.* Pericapsular nerve group block results in a longer  
26 analgesic effect and shorter time to discharge than femoral nerve block in patients  
27 after hip fracture surgery: a single-center double-blinded randomized trial. *J Int Med*  
28 *Res* 2022; 50:3000605221085073.  
29  
30  
31 91 Choi YS, Park KK, Lee B, *et al.* Pericapsular Nerve Group (PENG) Block versus  
32 Supra-Inguinal Fascia Iliaca Compartment Block for Total Hip Arthroplasty: A  
33 Randomized Clinical Trial. *J Pers Med* 2022; 12:408.  
34  
35  
36 92 Sahoo RK, Jadon A, Sharma SK, *et al.* Pericapsular nerve group (PENG) block for hip  
37 fractures: Another weapon in the armamentarium of anesthesiologists. *J Anaesthesiol*  
38 *Clin Pharmacol* 2021; 37:295-96.  
39  
40  
41 93 Black ND, Chin KJ. Pericapsular nerve group (PENG) block: Comments and practical  
42 considerations. *J Clin Anesth* 2019; 56:143-44.  
43  
44  
45 94 Del Buono R, Padua E, Pascarella G, *et al.* Pericapsular nerve group block: an  
46 overview. *Minerva Anesthesiol* 2021; 87:458-66.  
47  
48  
49 95 Bilal B, Öksüz G, Boran ÖF, *et al.* High volume pericapsular nerve group (PENG) block  
50 for acetabular fracture surgery: A new horizon for novel block. *J Clin Anesth* 2020;  
51 62:109702.  
52  
53  
54  
55  
56  
57  
58  
59  
60

- 1  
2  
3  
4 96 Endersby RVW, Moser JJ, Ho ECY, *et al.* Motor blockade after iliopsoas plane (IPB)  
5 and pericapsular nerve group (PENG) blocks: A little may go a long way. *Acta*  
6 *Anaesthesiol Scand* 2021; 65:135-36.  
7  
8  
9  
10 97 Yu HC, Moser JJ, Chu AY, *et al.* Inadvertent quadriceps weakness following the  
11 pericapsular nerve group (PENG) block. *Reg Anesth Pain Med* 2019; 44: 611-13.  
12  
13 98 Ciftci B, Ahiskalioglu A, Altintas HM, *et al.* A possible mechanism of motor blockade  
14 of high volume pericapsular nerve group (PENG) block: A cadaveric study. *J Clin*  
15 *Anesth* 2021; 74:110407.  
16  
17  
18 99 Mistry T, Sonawane KB. Gray zone of pericapsular nerve group (PENG) block. *J Clin*  
19 *Anesth* 2019; 58:123-24.  
20  
21  
22  
23 100 Allard C, Pardo E, de la Jonquière C, *et al.* Comparison between femoral block and  
24 PENG block in femoral neck fractures: A cohort study. *PLoS One* 2021;16: e0252716.  
25  
26  
27 101 Valoriani J, Conti D, Giancesello L, *et al.* Combined pericapsular nerve group and  
28 lateral femoral cutaneous nerve blocks for hip fracture in a polytraumatized patient-A  
29 case report. *Saudi J Anaesth* 2022; 16:211-13.  
30  
31  
32  
33 102 Gong WY, Li N, Chen YY, *et al.* Combination of Pericapsular Nerve Group (PENG)  
34 and Sacral Plexus Blocks for Minimally Invasive Percutaneous Internal Fixation in  
35 Outpatient with Femoral Neck Pathologic Fracture. *Pain Med* 2022; 23:427-428.  
36  
37  
38 103 Luo W, Liang J, Wu J, *et al.* Effects of pericapsular nerve group (PENG) block on  
39 postoperative recovery in elderly patients with hip fracture: study protocol for a  
40 randomised, parallel controlled, double-blind trial. *BMJ Open* 2022; 12: e051321.  
41  
42  
43  
44 104 Shamseer L, Moher D, Clarke M. Preferred reporting items for systematic review and  
45 meta-analysis protocols (PRISMA-P) 2015: elaboration and explanation. *BMJ* 2015;  
46 350: g7647.  
47  
48  
49  
50 105 Higgins JPT, Thomas J, Chandler J, *et al.* Cochrane Handbook for Systematic  
51 Reviews of Interventions version 6.2 (updated February 2021). Cochrane, 2021.  
52 Available: [www.training.cochrane.org/handbook](http://www.training.cochrane.org/handbook).  
53  
54  
55  
56 106 Page MJ, McKenzie JE, Bossuyt PM, *et al.* The PRISMA 2020 statement: an updated  
57 guideline for reporting systematic reviews. *BMJ* 2021; 372: n71.  
58  
59  
60 107 Bravo D, Layera S, Aliste J, *et al.* Lumbar plexus block versus suprainguinal fascia

- iliaca block for total hip arthroplasty: a single-blinded, randomized trial. *J Clin Anesth* 2020; 66:109907.
- 108 Arnuntasupakul V, Chalachewa T, Leurcharusmee P, *et al.* Ultrasound with neurostimulation compared with ultrasound guidance alone for lumbar plexus block: A randomised single blinded equivalence trial. *Eur J Anaesthesiol* 2018; 35: 224-30.
- 109 McGillivray MK, Haldane C, Doherty C, *et al.* Evaluation of muscle strength following peripheral nerve surgery: A scoping review. *PMR* 2022; 14 :383-94.
- 110 Medical Research Council. Aids to the examination of the peripheral nervous system. Londres; 1976. (Memorandum). Behrends M, Yap EN, Zhang AL, Kolodzie K, Kinjo S, Harbell MW, Aleshi P. Preoperative Fascia Iliaca Block Does Not Improve Analgesia after Arthroscopic Hip Surgery, but Causes Quadriceps Muscles Weakness: A Randomized, Double-blind Trial. *Anesthesiology* 2018; 129:536-43.
- 111 Maffiuletti NA. Assessment of hip and knee muscle function in orthopaedic practice and research. *J Bone Joint Surg Am* 2010; 92:220-29.
- 112 Wessels E, Perrie H, Scribante J, *et al.* Quality of recovery in the perioperative setting: A narrative review. *J Clin Anesth* 2022; 78:110685.
- 113 Soares RW, Ruzbarsky JJ, Arner JW, *et al.* Midterm Outcomes After Hip Labral Augmentation in Revision Hip Arthroscopy. *Am J Sports Med* 2022; 50:1299-05.
- 114 Gheibi S, Mahmoodzadeh A, Kashfi K, *et al.* Data Extraction from Graphs Using Adobe Photoshop: Applications for Meta-Analyses. *Int J Endocrinol Metab* 2019;17: e95216.
- 115 Higgins JPT, Altman DG, Gøtzsche PC, *et al.* The Cochrane collaboration's tool for assessing risk of bias in randomised trials. *BMJ* 2011; 343: d5928.
- 116 Higgins JPT, Savović J, Page MJ, *et al.* Chapter 8: Assessing risk of bias in a randomized trial. In: Higgins JPT, Thomas J, Chandler J, Cumpston M, Li T, Page MJ, Welch VA (editors). *Cochrane Handbook for Systematic Reviews of Interventions* version 6.2 (updated February 2021). Cochrane, 2021. Available from [www.training.cochrane.org/handbook](http://www.training.cochrane.org/handbook).
- 117 Savović J, Turner RM, Mawdsley D, *et al.* Association between Risk of-Bias assessments and results of randomized trials in Cochrane reviews: the ROBES Meta-

- Epidemiologic study. *Am J Epidemiol* 2018;187: 1113-22.
- 118 Wetterslev J, Thorlund K, Brok J, *et al*. Estimating required information size by quantifying diversity in random-effects model meta-analyses. *BMC Med Res Methodol* 2009; 9:86.
- 119 Wetterslev J, Jakobsen JC, Gluud C. Trial sequential analysis in systematic reviews with meta-analysis. *BMC Med Res Methodol* 2017; 17:39.
- 120 Wetterslev J, Thorlund K, Brok J, *et al*. Trial sequential analysis may establish when firm evidence is reached in cumulative meta-analysis. *J Clin Epidemiol* 2008; 61: 64-75.
- 121 Thorlund K, Engstrøm J, Wetterslev J, *et al*. User manual for trial sequential analysis (TSA) Copenhagen trial unit, centre for clinical intervention research, Denmark; 2011. Available: <http://www.ctu.dk/tsa> [Accessed 2021].
- 122 Imberger G, Thorlund K, Gluud C, *et al*. False-Positive findings in Cochrane meta-analyses with and without application of trial sequential analysis: an empirical review. *BMJ Open* 2016;6: e011890.
- 123 Brok J, Thorlund K, Gluud C, *et al*. Trial sequential analysis reveals insufficient information size and potentially false positive results in many meta-analyses. *J Clin Epidemiol* 2008; 61:763-9.
- 124 Norman GR, Sloan JA, Wyrwich KW. Interpretation of changes in health-related quality of life: the remarkable universality of half a standard deviation. *Med Care* 2003; 41:582-92.
- 125 Castellini G, Nielsen EE, Gluud C. Comment on: "Cell therapy for heart disease: Trial sequential analyses of two cochrane reviews". *Clin Pharmacol Ther* 2017; 102:21-4.
- 126 Egger M, Davey Smith G, Schneider M, *et al*. Bias in meta-analysis detected by a simple, graphical test. *BMJ* 1997;315: 629-34.
- 127 Sterne JA, Gavaghan D, Egger M. Publication and related bias in meta-analysis: power of statistical tests and prevalence in the literature. *J Clin Epidemiol* 2000; 53:1119-29.
- 128 Mavridis D, Salanti G. How to assess publication bias: funnel plot, trim-and-fill method and selection models. *Evid Based Ment Health* 2014; 17:30.

1  
2  
3  
4 129 Guyatt G, Oxman AD, Akl EA, *et al*. Grade guidelines: 1. Introduction-GRADE  
5 evidence profiles and summary of findings tables. *J Clin Epidemiol* 2011; 64:383-94.  
6  
7

## 8 Figure Legends

9

10  
11 Figure 1. The PRISMA flow diagram. PRISMA, Preferred Reporting Items  
12  
13 for Systematic Reviews and Meta-analysis.  
14  
15  
16  
17  
18  
19  
20  
21  
22  
23  
24  
25  
26  
27  
28  
29  
30  
31  
32  
33  
34  
35  
36  
37  
38  
39  
40  
41  
42  
43  
44  
45  
46  
47  
48  
49  
50  
51  
52  
53  
54  
55  
56  
57  
58  
59  
60

For peer review only

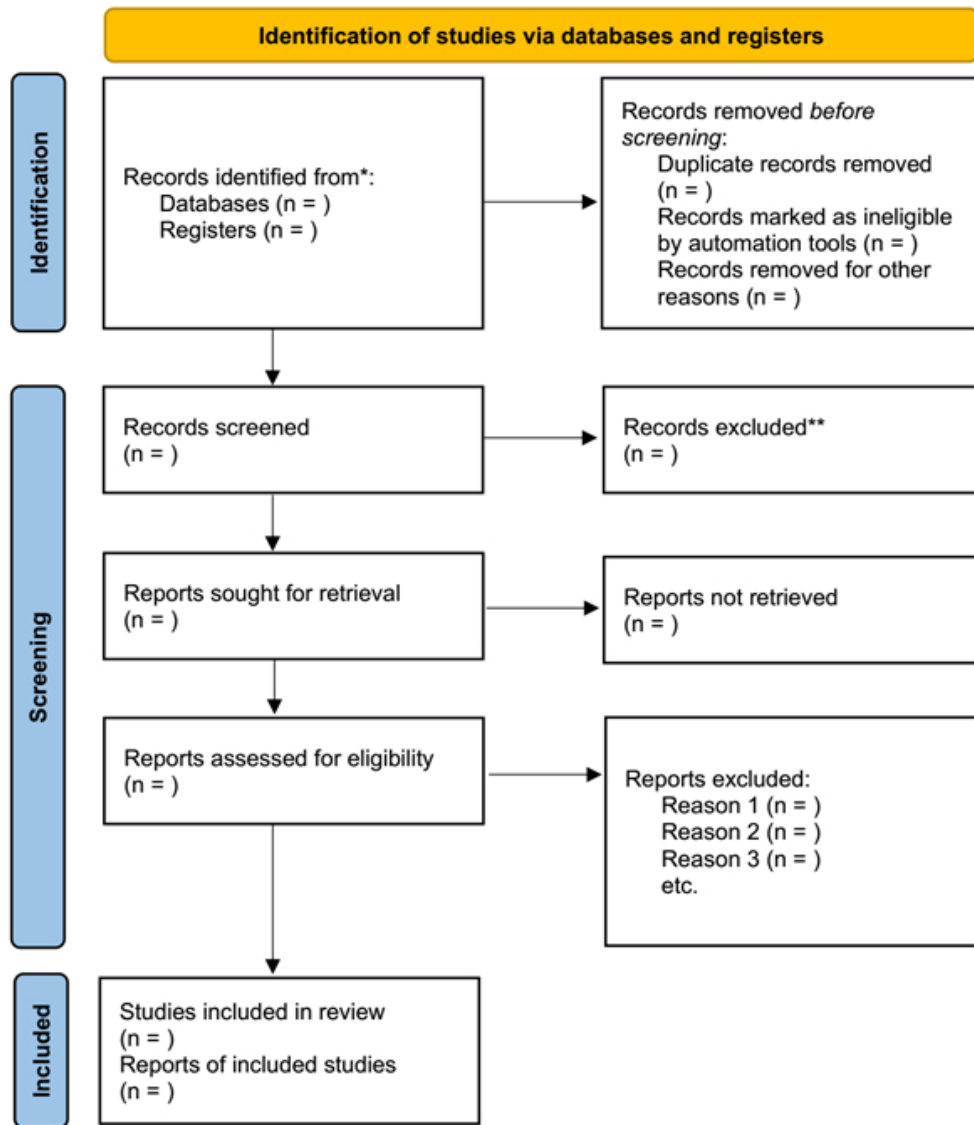

The PRISMA flow diagram



## Supplementary Appendix file 1: Search strategy

### Search strategy of PubMed as follows:

#1 “Hip” [MeSH Terms] OR Hips [tiab] OR Coxa [tiab] OR Coxas [tiab]

#2 “arthroscopy” [Mesh] or Arthroscopies[af] or Arthroscopic Surgical Procedures [af] or Arthroscopic Surgical Procedure[af] or Procedure, Arthroscopic Surgical[af] or Procedures, Arthroscopic Surgical[af] or Surgical Procedure, Arthroscopic[af] or Surgery, Arthroscopic [af] or Surgical Procedures, Arthroscopic[af] or Arthroscopic Surgery [af] or Arthroscopic Surgeries[af] or Surgeries, Arthroscopic[af]

#3 #1 AND #2

#4 “Hip Fracture” [Mesh] OR “Femoral Neck Fractures” [Mesh] OR Femoral Neck Fracture [tiab] OR Femur Neck Fractures[tiab] OR Femur Neck Fracture [tiab] OR Fractures, Hip [af] OR Trochanteric Fractures [af] OR Fractures, Trochanteric [af] OR Intertrochanteric Fractures [af] OR Fractures, Intertrochanteric [af] OR Subtrochanteric Fractures [af] OR Fractures, Subtrochanteric [af] OR Femoral Fracture[af] OR Fracture, Femoral [af] OR Fractures, Femoral [af] (hip\* or intertrochanteric or subtrochanteric or trochanteric or pertrochanteric or peritrochanteric or femur or femoral or acetabul\*) AND fracture\*

#5 “Osteoarthritis, Hip” [Mesh] OR Hip Osteoarthritis[af] OR Osteoarthritis Of Hip [af] OR Osteoarthritis Of Hips[af] OR Coxarthrosis [af] OR Coxarthroses [af] OR Osteoarthritis of the Hip[af]

#6 Hip Injuries [Mesh] OR Hip Dislocation [Mesh] OR Injuries, Hip [af] OR Dislocation, Hip [af] OR Dislocations, Hip[af] OR Hip Dislocations[af] OR Hip Displacement[af] OR Displacement, Hip[af] OR Displacements, Hip[af] OR Hip Displacements[af] OR Hip Dysplasia[af] OR Dysplasia, Hip[af] OR Dysplasias, Hip[af] OR Hip Dysplasias [af]

#7 “Hip Prosthesis” [Mesh] OR “Arthroplasty, Replacement, Hip” [Mesh] OR Hip Prostheses [af] OR Prostheses, Hip[af] OR Prosthesis, Hip[af] OR Femoral Head Prosthesis[af] OR Femoral Head Prostheses[af] OR Prostheses, Femoral Head [af] OR Prosthesis, Femoral Head [af] OR Arthroplasties, Replacement, Hip [af] OR Arthroplasty, Hip Replacement [af] OR Hip Prosthesis Implantation [af] OR Hip Prosthesis Implantations [af] OR Implantation, Hip Prosthesis [af] OR Prosthesis Implantation, Hip [af] OR Hip Replacement Arthroplasty [af] OR Replacement Arthroplasties, Hip [af] OR Replacement Arthroplasty, Hip [af] OR Arthroplasties, Hip

1  
2  
3  
4 Replacement [af] OR Hip Replacement Arthroplasties [af] OR Hip Replacement, Total [af] OR Total  
5 Hip Replacement [af] OR Total Hip Arthroplasty [af] OR Arthroplasty, Total Hip [af] OR Hip  
6 Arthroplasty, Total [af] OR Total Hip Arthroplasties [af] OR Replacement, Total Hip [af] OR Total  
7 Hip Replacements [af]

8  
9  
10  
11 #8 #3 OR #4 OR #5 OR #6 OR #7

12  
13 #9 “Aged” [Mesh] or "Aged, 80 and over"[Mesh] or "Aged, 65 and over"[Mesh] or Centenarians  
14 [Mesh] or Nonagenarians [Mesh] or Octogenarians [Mesh] or Geriatrics [Mesh] or Elderly [af] or  
15 Centenarian [af] or Nonagenarian [af] or Oldest Old [af] or Octogenarian [af] or aging [af] or aged  
16 [af] or elderly[af] or senior [af] or old [af] or old-age[af].

17  
18  
19 #10 “pericapsular nerve group block” [af] OR PENG [af]

20  
21  
22 #11 #8 AND #9 AND #10

23  
24 #12 “controlled clinical trial” [Publication Type] OR “randomized controlled trial” [Publication  
25 Type] OR “randomized” [Title/Abstract] OR “randomized” [Title/Abstract] OR “Placebo”  
26 [Title/Abstract] OR “randomly” [Title/Abstract] OR “Clinical trial” [Title]

27  
28  
29 #13 (animals [MeSH Terms]) NOT ((human [MeSH Terms]) AND (animals [MeSH Terms]))

30  
31  
32 #14 #11 and #12 not #13

33  
34  
35 **Search strategy of Cochrane library as follows:**

36  
37 #1 MeSH descriptor: [Hip] explode all trees.

38  
39 #2 (Hips OR Coxa OR Coxas): ti,ab,kw

40  
41 #3 #1 or # 2

42  
43 #4 MeSH descriptor: [arthroscopy] explode all trees

44  
45 #5 (arthroscop\*): ti,ab,kw

46  
47 #6 #4 or # 5

48  
49 #7 #3 and # 6

50  
51 #8 MeSH descriptor: [Hip Fracture] explode all trees

52  
53 #9 (hip surgery OR hip prosthes\* OR hip replacement\* OR hip arthroplast\* OR femoral head  
54 prosthes\* OR joint prosthes\*): ti,ab,kw

55  
56 #10 ((hip\* or fem?r\* or intertrochant\* or trochant\* or pertrochant\* or intertrochant\* or  
57 peritrochant\* or subtrochant\* or intracapsular\* or extracapsular\* or acetabul\*) and fracture\*)

58  
59 #11 MeSH descriptor: [Osteoarthritis, Hip] explode all trees  
60

#12 (Hip Osteoarthritis OR Osteoarthritis Of Hip OR Osteoarthritis Of Hips OR Coxarthrosis OR Coxarthroses OR Osteoarthritis of the Hip): ti,ab,kw

#13 MeSH descriptor: [Hip Injuries] explode all trees

#14 ((disloca\* or displace\* or dysplas\*) and hip\*)

#15 #7 or #8 or #9 or #10 or #11 or #12 or #13 or #14

#16 MeSH descriptor: [Aged] explode all trees

#17 MeSH descriptor: [Aged, 80 and over] explode all trees

#18 MeSH descriptor: [Aged, 65 and over] explode all trees

#19 MeSH descriptor: [Geriatrics] explode all trees

#20 MeSH descriptor: [Nonagenarians] explode all trees

#21 MeSH descriptor: [Octogenarians] explode all trees

#22((Geriatric\* or Elder\* or old-age or pensioner\*or aging or aged or elderly or senior or old or Oldest Old or old-age or Nonagenarian\* or Octogenarian\*)

#23 #16 or #17 or #18 or #19 or #20 or #21 or #22

#24 (pericapsular nerve group block or PENG): ti,ab,kw

#25 (controlled clinical trial):pt or (randomized controlled trial):pt or (random\*): ti,ab,kw or (Clinical trial):ti,ab,kw

#26 #15 and #23 and #24 and #25

### **Search strategy of Web of Science as follows:**

#1 TS= (Hip or Hips or Coxa or Coxas)

#2 TS= (arthroscop\*)

#3 #1 and #2

#4 TS= (Hip\* or femu\* or femo\* or intertrochant\* or trochant\* or pertrochant\* or intertrochant\* or peritrochant\* or subtrochant\* or intracapsular\* or extracapsular\* or acetabul\*)

#5 TS= (fracture\*)

#6 #4 and #5

#7 TS= (Hip Osteoarthritis or Osteoarthritis of Hip or Osteoarthritis of Hips or Coxarthrosis or Coxarthroses or Osteoarthritis of the Hip)

#8 TS= (Hip Injuries or Hip disloca\* or Hip displace\* or Hip dysplas\*)

#9 #3 OR #6 OR #7 OR #8

1  
2  
3  
4 #10 TS= (Geriatric\* or Elder\* or old-age or pensioner\* or aging or aged or elderly or senior or old  
5 or Oldest Old or old-age or Nonagenarian\* or Octogenarian\*)

6  
7 #11 TS= (pericapsular nerve group block or PENG)

8  
9 #12 TS= (random\* or Clinical trial)

10  
11 #13 #9 and #10 and #11 and #12

12  
13 **Search strategy for Ovid Medline as follows:**

14  
15 #1 exp Hip/

16  
17 #2 (Hips OR Coxa OR Coxas) .mp.

18  
19 #3 #1 or # 2

20  
21 #4 exp arthroscopy/

22  
23 #5 (arthroscop\*).mp.

24  
25 #6 #4 or # 5

26  
27 #7 #3 and # 6

28  
29 #8 exp Hip Fracture/

30  
31 #9 (hip surgery OR hip prosthes\* OR hip replacement\* OR hip arthroplast\* OR femoral head  
32 prosthes\* OR joint prosthes\*).mp.

33  
34 #10 ((hip\* or fem\*r\* or intertrochant\* or trochant\* or pertrochant\* or intertrochant\* or  
35 peritrochant\* or subtrochant\* or intracapsular\* or extracapsular\* or acetabul\*) and fracture\*).mp.

36  
37 #11 exp Osteoarthritis, Hip/

38  
39 #12 (Hip Osteoarthritis or Osteoarthritis of Hip or Osteoarthritis of Hips or Coxarthrosis or  
40 Coxarthroses or Osteoarthritis of the Hip) .mp.

41  
42 #13 exp Hip Injuries/

43  
44 #14 ((disloca\* or displace\* or dysplas\*) and hip\*).mp.

45  
46 #15 #7 or #8 or #9 or #10 or #11 or #12 or #13 or #14

47  
48 #16 exp Aged/

49  
50 #17 exp Aged, 80 and over/

51  
52 #18 exp Aged, 65 and over/

53  
54 #19 exp Geriatrics/

55  
56 #20 exp Nonagenarians/

57  
58 #21 exp Octogenarians/

1  
2  
3  
4 #22((Geriatric\* or Elder\* or old-age or pensioner\*or aging or aged or elderly or senior or old or  
5 Oldest Old or old-age or Nonagenarian\* or Octogenarian\*).mp.

6  
7 #23 #16 or #17 or #18 or #19 or #20 or #21 or #22

8  
9 #24 (pericapsular nerve group block or PENG) .mp.

10  
11 #25 #15 and #23 and #24

12  
13 #26 randomized controlled trial.pt.

14  
15 #27controlled clinical trial.pt.

16  
17 #28 randomized.ab.

18  
19 #29 placebo.ab.

20  
21 #30 clinical trials as topic.sh.

22  
23 #31 randomly.ab.

24  
25 #32 trial.ti.

26  
27 #33 #26 or #27 or #28 or #29 or #30 or #31 or #32

28  
29 #34 (animals not (humans and animals)).sh.

30  
31 #35 #25 and #33 not #34

32  
33 **Search strategy for Embase as follows:**

34  
35 #1 exp Hip/

36  
37 #2 (Hips OR Coxa OR Coxas) .mp.

38  
39 #3 #1 or # 2

40  
41 #4 exp arthroscopy/

42  
43 #5 (arthroscop\*).mp.

44  
45 #6 #4 or # 5

46  
47 #7 #3 and # 6

48  
49 #8 exp Hip Fracture/

50  
51 #9 (hip surgery OR hip prothes\* OR hip replacement\* OR hip arthroplast\* OR femoral head  
52 prothes\* OR joint prothes\*).mp.

53  
54 #10 ((hip\* or fem?r\* or intertrochant\* or trochant\* or pertrochant\* or intertrochant\* or  
55 peritrochant\* or subtrochant\* or intracapsular\* or extracapsular\* or acetabul\*) and fracture\*).mp.

56  
57 #11 exp Osteoarthritis, Hip/

58  
59 #12 (Hip Osteoarthritis or Osteoarthritis of Hip or Osteoarthritis of Hips or Coxarthrosis or  
60

1  
2  
3  
4 Coxarthroses or Osteoarthritis of the Hip) .mp.

5 #13 exp Hip Injuries/

6  
7 #14 ((disloca\* or displace\* or dysplas\*) and hip\*).mp.

8  
9 #15 #7 or #8 or #9 or #10 or #11 or #12 or #13 or #14

10  
11 #16 exp Aged/

12  
13 #17 exp Aged, 80 and over/

14  
15 #18 exp Aged, 65 and over/

16  
17 #19 exp Geriatrics/

18  
19 #20 exp Nonagenarians/

20  
21 #21 exp Octogenarians/

22  
23 #22((Geriatric\* or Elder\* or old-age or pensioner\*or aging or aged or elderly or senior or old or  
24 Oldest Old or old-age or Nonagenarian\* or Octogenarian\*).mp.

25  
26 #23 #16 or #17 or #18 or #19 or #20 or #21 or #22

27  
28 #24 (pericapsular nerve group block or PENG) .mp.

29  
30 #25 #15 and #23 and #24

31  
32 #26 exp randomized controlled trial/

33  
34 #27(random\*).mp.

35  
36 #28 (placebo\*).mp.

37  
38 #29 Clinical trial.mp.

39  
40 #30 clinical trials as topic.sh.

41  
42 #31 #26 or #27 or #28 or #29 or #30

43  
44 #32 (exp animal/ or nonhuman/ or exp animal experiment/) not human/

45  
46 #33 #25 and #31 not #32

#### 47 48 **WHO ICTRP Trial registry**

49  
50 <http://apps.who.int/trialsearch> (WHO ICTRP register) will be searched via the advanced search page.

51  
52 Search terms were: (Hips OR Coxa OR Coxas or fem?r\* or intertrochant\* or trochant\* or  
53 pertrochant\* or intertrochant\* or peritrochant\* or subtrochant\* or intracapsular\* or extracapsular\*  
54 or acetabul\*) AND (Geriatric\* or Elder\* or old-age or pensioner\*or aging or aged or elderly or  
55 senior or old or Oldest Old or old-age or Nonagenarian\* or Octogenarian\*) AND (pericapsular nerve  
56 group block or PENG).  
57  
58  
59  
60

## Clinicaltrials.gov search strategy

<http://clinicaltrials.gov> (NIH register) will be searched via advanced search page. Search terms were:

Condition or disease: (Hips OR Coxa OR Coxas or fem?r\* or intertrochant\* or trochant\* or pertrochant\* or intertrochant\* or peritrochant\* or subtrochant\* or intracapsular\* or extracapsular\* or acetabul\*) AND (Geriatric\* or Elder\* or old-age or pensioner\* or aging or aged or elderly or senior or old or Oldest Old or old-age or Nonagenarian\* or Octogenarian\*).

Study type: Interventional Studies.

Intervention/treatment: (pericapsular nerve group block or PENG)

## Chinese database

### China National Knowledge Infrastructure (CNKI) search strategy

(髋[全部字段]or 关节[全部字段]or 股骨头[全部字段]or 关节唇[全部字段]or 股骨颈 [全部字段] or 转子 [全部字段] or 骨盆 [全部字段] or 关节炎[全部字段] or 骨折[全部字段]or 损伤 [全部字段] or 脱位[全部字段] or 撞击[全部字段] or 关节镜[全部字段] or 微创[全部字段] or 保守[全部字段]or 置换[全部字段] or 成形[全部字段] or 假体[全部字段] or 固定[全部字段] or 外伤[全部字段]) and (关节囊周[全部字段]or PENG[全部字段]or 阻滞 [全部字段]) and (老年[全部字段] or 高龄[全部字段] or 老龄 or 80 岁以上[全部字段]) and (随机[全部字段] or 对照[全部字段])

### Chinese BioMedical Literature (CBM)

(髋[全部字段] or 关节[全部字段] or 股骨头[全部字段]or 关节唇[全部字段] or 股骨颈 [全部字段] or 转子 [全部字段] or 骨盆 [全部字段] or 关节炎[全部字段] or 骨折[全部字段]or 损伤 [全部字段] or 脱位[全部字段] or 撞击[全部字段] or 关节镜[全部字段] or 微创[全部字段] or 保守[全部字段]or 置换[全部字段] or 成形[全部字段] or 假体[全部字段] or 固定[全部字段] or 外伤[全部字段]) and (关节囊周[全部字段]or PENG[全部字段]or 阻滞 [全部字段]) and (老年[全部字段] or 高龄[全部字段] or 老龄 or 80 岁以上[全部字段]) and (随机[全部字段] or 对照[全部字段])

## VIP database

关键词=(髋 or 关节 or 股骨头 or 关节唇 or 股骨颈 or 转子 or 骨盆 or 关节炎 or 骨折 or 损伤 or 脱位 or 撞击 or 关节镜 or 微创 or 保守 or 置换 or 成形 or 假体 or 固定 or 外伤) AND 关键词=(老年 or 高龄 or 老龄 or 80 岁以上) AND 关键词=(关节囊周 or PENG or 阻滞) AND

1  
2  
3  
4 关键词=(随机 or 对照)  
5

6 **Wan fang database.**  
7

8 (髌[全部字段]or 关节[全部字段]股骨头[全部字段]or 关节唇[全部字段]or 股骨颈 [全部字段]  
9 or 转子 [全部字段] or 骨盆 [全部字段] or 关节炎[全部字段] or 骨折[全部字段]or 损伤[全  
10 部字段] or 脱位[全部字段] or 撞击[全部字段] or 关节镜[全部字段] or 微创[全部字段] or 保  
11 守[全部字段]or 置换[全部字段] or 成形[全部字段] or 假体[全部字段] or 固定[全部字段] or  
12 外伤[全部字段]) and (关节囊周[全部字段] or PENG[全部字段] or 阻滞 [全部字段]) and (老  
13 年[全部字段] or 高龄[全部字段] or 老龄 or 80 岁以上[全部字段]) and (随机[全部字段] or 对  
14 照[全部字段])  
15  
16  
17  
18  
19  
20  
21  
22  
23  
24  
25  
26  
27  
28  
29  
30  
31  
32  
33  
34  
35  
36  
37  
38  
39  
40  
41  
42  
43  
44  
45  
46  
47  
48  
49  
50  
51  
52  
53  
54  
55  
56  
57  
58  
59  
60



## Supplementary Appendix file 2 : Assessment of risk of bias

### Random sequence generation

- **Low risk:** If sequence generation was achieved using computer random number generator or a random number table. Drawing lots, tossing a coin, shuffling cards, and throwing dice were also considered adequate if performed by an independent adjudicator.
- **Unclear risk:** If the method of randomisation was not specified, but the trial was still presented as being randomised.
- **High risk:** If the allocation sequence is not randomised or only quasi-randomised. These trials will be excluded.

### Allocation concealment

- **Low risk:** If the allocation of patients was performed by a central independent unit, onsite locked computer or identical-looking numbered sealed envelopes.
- **Uncertain risk:** If the trial was classified as randomised but the allocation concealment process was not described.
- **High risk:** If the allocation sequence was familiar to the investigators who assigned participants.

### Blinding of participants and treatment providers

- **Low risk:** If the participants and the treatment providers were blinded to intervention allocation and this was described.
- **Uncertain risk:** If the procedure of blinding was insufficiently described.
- **High risk:** If blinding of participants and the treatment providers was not performed.

### Blinding of outcome assessment

- **Low risk of bias:** If it was mentioned that outcome assessors were blinded and this was described.
- **Uncertain risk of bias:** If it was not mentioned if the outcome assessors in the trial were blinded or the extent of blinding was insufficiently described.
- **High risk of bias:** If no blinding or incomplete blinding of outcome assessors was performed.

### Incomplete outcome data

- **Low risk of bias:** If missing data were unlikely to make treatment effects depart from plausible

1  
2  
3  
4 values. This could be either (1) there were no drop-outs or withdrawals for all outcomes, or (2)  
5  
6 the numbers and reasons for the withdrawals and drop-outs for all outcomes were clearly stated  
7  
8 and could be described as being similar to both groups. Generally, the trial is judged as at a low  
9  
10 risk of bias due to incomplete outcome data if drop-outs are less than 5%. However, the 5%  
11  
12 cut-off is not definitive.

- 13  
14 ➤ **Uncertain risk of bias:** If there was insufficient information to assess whether missing data  
15  
16 were likely to induce bias on the results.
- 17  
18 ➤ **High risk of bias:** If the results were likely to be biased due to missing data either because the  
19  
20 pattern of drop-outs could be described as being different in the two intervention groups or the  
21  
22 trial used improper methods in dealing with the missing data (e.g. last observation carried  
23  
24 forward).

### 25 **Selective outcome reporting**

- 26  
27 ➤ **Low risk of bias:** If a protocol was published before or at the time the trial was begun and the  
28  
29 outcomes specified in the protocol were reported on. If there is no protocol or the protocol was  
30  
31 published after the trial has begun, reporting of serious adverse events will grant the trial a  
32  
33 grade of low risk of bias.
- 34  
35 ➤ **Uncertain risk of bias:** If no protocol was published and the outcome of serious adverse events  
36  
37 were not reported on.
- 38  
39 ➤ **High risk of bias:** If the outcomes in the protocol were not reported on.

### 40 **Other risks of bias**

- 41  
42 ➤ **Low risk of bias:** If the trial appears to be free of other components that could put it at risk of  
43  
44 bias.
- 45  
46 ➤ **Unclear risk of bias:** If the trial may or may not be free of other components that could put it  
47  
48 at risk of bias.
- 49  
50 ➤ **High risk of bias:** If there are other factors in the trial that could put it at risk of bias (including,  
51  
52 Design-specific risk of bias, stopped early due to some data-dependent process including a  
53  
54 formal-stopping rule, baseline imbalance, claimed fraudulent, blocked randomization in  
55  
56 unblinded trials, differential diagnostic activity, contamination, inappropriate measurement  
57  
58 instrument for outcomes, deviation from the study protocol unrelated to the clinical practice,  
59  
60 authors conducted trials on the same topic, academic bias, for-profit bias, inappropriate

financial conflict of interest).

### Overall risk of bias

- **Low risk of bias:** The trial will be classified as overall ‘low risk of bias’ only if all of the bias domains described in the above paragraphs are classified as ‘low risk of bias’.
- **High risk of bias:** The trial will be classified as ‘high risk of bias’ if any of the bias risk domains described in the above are classified as ‘unclear’ or ‘high risk of bias’.
- We will assess the domains ‘blinding of outcome assessment’, ‘incomplete outcome data’, and ‘selective out- come reporting’ for each outcome result. Thus, we can assess the bias risk for each outcome assessed in addition to each trial. Our primary conclusions will be based on the results of our primary outcome results with overall low risk of bias. Both our primary and secondary conclusions will be presented in the summary of findings tables.

### Criteria classification

- If all risk of bias domains were scored as having a low risk of bias, the trial was defined as having a low overall risk of bias.
- If one or more of the bias domains were scored as unclear or high risk of bias, the trial was defined as having a high overall risk of bias.
- Trials with a low risk of bias in all domains (including sequence generation, allocation concealment, blinding, incomplete data, selective outcome reporting, and other risks of bias) will be classified as having a low overall risk of bias.
- Trials with one or more of these domains scored as unclear or high risk of bias will be defined as having a high overall risk of bias.

## PRISMA-P checklist

**Table** PRISMA-P (preferred reporting items for systematic review and meta-analysis protocols) 2015 checklist: recommended items to address in a systematic review protocol

| Section and topic                 | Item No | Checklist item                                                                                                                                                                                                                | Reported on page # |
|-----------------------------------|---------|-------------------------------------------------------------------------------------------------------------------------------------------------------------------------------------------------------------------------------|--------------------|
| <b>Administrative information</b> |         |                                                                                                                                                                                                                               |                    |
| Title:                            |         |                                                                                                                                                                                                                               |                    |
| Identification                    | 1a      | Identify the report as a protocol of a systematic review                                                                                                                                                                      | 1                  |
| Update                            | 1b      | If the protocol is for an update of a previous systematic review, identify as such                                                                                                                                            | None               |
| Registration                      | 2       | If registered, provide the name of the registry (such as PROSPERO) and registration number                                                                                                                                    | 3,8                |
| Authors:                          |         |                                                                                                                                                                                                                               |                    |
| Contact                           | 3a      | Provide name, institutional affiliation, e-mail address of all protocol authors; provide physical mailing address of corresponding author                                                                                     | 1                  |
| Contributions                     | 3b      | Describe contributions of protocol authors and identify the guarantor of the review                                                                                                                                           | 24                 |
| Amendments                        | 4       | If the protocol represents an amendment of a previously completed or published protocol, identify as such and list changes; otherwise, state plan for documenting important protocol amendments                               | None               |
| Support:                          |         |                                                                                                                                                                                                                               |                    |
| Sponsor                           | 5b      | Provide name for the review funder and/or sponsor                                                                                                                                                                             | None               |
| Role of sponsor or funder         | 5c      | Describe roles of funder(s), sponsor(s), and/or institution(s), if any, in developing the protocol                                                                                                                            | None               |
| <b>Introduction</b>               |         |                                                                                                                                                                                                                               |                    |
| Rationale                         | 6       | Describe the rationale for the review in the context of what is already known                                                                                                                                                 | 4-7                |
| Objectives                        | 7       | Provide an explicit statement of the question(s) the review will address with reference to participants, interventions, comparators, and outcomes (PICO)                                                                      | 7-13               |
| <b>Methods</b>                    |         |                                                                                                                                                                                                                               |                    |
| Eligibility criteria              | 8       | Specify the study characteristics (such as PICO, study design, setting, time frame) and report characteristics (such as years considered, language, publication status) to be used as criteria for eligibility for the review | 8-13 ; 14-15       |

1  
2  
3  
4  
5  
6  
7  
8  
9  
10  
11  
12  
13  
14  
15  
16  
17  
18  
19  
20  
21  
22  
23  
24  
25  
26  
27  
28  
29  
30  
31  
32  
33  
34  
35  
36  
37  
38  
39  
40  
41  
42  
43  
44  
45  
46

|                                    |     |                                                                                                                                                                                                                                                  |           |
|------------------------------------|-----|--------------------------------------------------------------------------------------------------------------------------------------------------------------------------------------------------------------------------------------------------|-----------|
| Information sources                | 9   | Describe all intended information sources (such as electronic databases, contact with study authors, trial registers or other grey literature sources) with planned dates of coverage                                                            | 13-16     |
| Search strategy                    | 10  | Present draft of search strategy to be used for at least one electronic database, including planned limits, such that it could be repeated                                                                                                       | 13-14, S1 |
| Study records:                     |     |                                                                                                                                                                                                                                                  |           |
| Data management                    | 11a | Describe the mechanism(s) that will be used to manage records and data throughout the review                                                                                                                                                     | 14-16     |
| Selection process                  | 11b | State the process that will be used for selecting studies (such as two independent reviewers) through each phase of the review (that is, screening, eligibility and inclusion in meta-analysis)                                                  | 14-15     |
| Data collection process            | 11c | Describe planned method of extracting data from reports (such as piloting forms, done independently, in duplicate), any processes for obtaining and confirming data from investigators                                                           | 14-16     |
| Data items                         | 12  | List and define all variables for which data will be sought (such as PICO items, funding sources), any pre-planned data assumptions and simplifications                                                                                          | 16        |
| Outcomes and prioritization        | 13  | List and define all outcomes for which data will be sought, including prioritization of main and additional outcomes, with rationale                                                                                                             | 10-13     |
| Risk of bias in individual studies | 14  | Describe anticipated methods for assessing risk of bias of individual studies, including whether this will be done at the outcome or study level, or both; state how this information will be used in data synthesis                             | 16-20     |
| Data synthesis                     | 15a | Describe criteria under which study data will be quantitatively synthesised                                                                                                                                                                      | 17        |
|                                    | 15b | If data are appropriate for quantitative synthesis, describe planned summary measures, methods of handling data and methods of combining data from studies, including any planned exploration of consistency (such as $I^2$ , Kendall's $\tau$ ) | 17        |
|                                    | 15c | Describe any proposed additional analyses (such as sensitivity or subgroup analyses, meta-regression)                                                                                                                                            | 18-21     |
|                                    | 15d | If quantitative synthesis is not appropriate, describe the type of summary planned                                                                                                                                                               | 17        |
| Meta-bias(es)                      | 16  | Specify any planned assessment of meta-bias(es) (such as publication bias across studies, selective reporting within studies)                                                                                                                    | 20        |
| Confidence in cumulative evidence  | 17  | Describe how the strength of the body of evidence will be assessed (such as GRADE)                                                                                                                                                               | 18-20     |

# BMJ Open

## Efficacy of pericapsular nerve group (PENG) block on perioperative pain management in elderly patients undergoing hip surgical procedures: a protocol for a systematic review with meta-analysis and trial sequential analysis

|                                 |                                                                                                                                                                                                                                                                                                                                                                                                                                                                                                                                   |
|---------------------------------|-----------------------------------------------------------------------------------------------------------------------------------------------------------------------------------------------------------------------------------------------------------------------------------------------------------------------------------------------------------------------------------------------------------------------------------------------------------------------------------------------------------------------------------|
| Journal:                        | <i>BMJ Open</i>                                                                                                                                                                                                                                                                                                                                                                                                                                                                                                                   |
| Manuscript ID                   | bmjopen-2022-065304.R1                                                                                                                                                                                                                                                                                                                                                                                                                                                                                                            |
| Article Type:                   | Protocol                                                                                                                                                                                                                                                                                                                                                                                                                                                                                                                          |
| Date Submitted by the Author:   | 20-Oct-2022                                                                                                                                                                                                                                                                                                                                                                                                                                                                                                                       |
| Complete List of Authors:       | Zheng, Jianqiao; Sichuan University West China Hospital, Department of Anesthesiology<br>Du, Li; Sichuan Cancer Hospital and Research Institute, Department of Anesthesiology<br>Chen, Guo; Sichuan University West China Hospital, Department of Anesthesiology<br>Zhang, Lu; Sichuan University West China Hospital, Department of Anesthesiology<br>Deng, Xiaoqian; Sichuan University West China Hospital, Department of Anesthesiology<br>Zhang, Weiyi; Sichuan University West China Hospital, Department of Anesthesiology |
| <b>Primary Subject Heading</b>: | Anaesthesia                                                                                                                                                                                                                                                                                                                                                                                                                                                                                                                       |
| Secondary Subject Heading:      | Anaesthesia, Surgery, Global health                                                                                                                                                                                                                                                                                                                                                                                                                                                                                               |
| Keywords:                       | Hip < ORTHOPAEDIC & TRAUMA SURGERY, Anaesthesia in orthopaedics < ANAESTHETICS, Pain management < ANAESTHETICS                                                                                                                                                                                                                                                                                                                                                                                                                    |
|                                 |                                                                                                                                                                                                                                                                                                                                                                                                                                                                                                                                   |

SCHOLARONE™  
Manuscripts

**TITLE PAGE**

Efficacy of pericapsular nerve group (PENG) block on perioperative pain management in elderly patients undergoing hip surgical procedures: a protocol for a systematic review with meta-analysis and trial sequential analysis

**Authors**

Jianqiao Zheng<sup>1</sup> E-mail: zhjq1983@163.com

Li Du<sup>2</sup> E-mail: huaying-duli@163.com

Guo Chen<sup>1</sup> E-mail: Anesthesiology\_SCU@163.com

Lu Zhang<sup>1</sup> E-mail: 304022514@qq.com

Xiaoqian Deng<sup>1</sup> E-mail: 50058837@qq.com

\*Weiyi Zhang<sup>1</sup> E-mail: zhangweiyi@wchscu.cn

<sup>1</sup>Department of Anesthesiology, West China Hospital, Sichuan University No. 37th, Guoxue Alley, Wuhou District, Chengdu 610041, Sichuan, China.

<sup>2</sup>Department of Anesthesiology, Sichuan Cancer Hospital & Institute, Sichuan Cancer Center, School of Medicine, University of Electronic Science and Technology of China, No.55th, People's South Road, Chengdu 610041, Sichuan, China.

\*Corresponding Author

Name: Weiyi Zhang

E-mail: zhangweiyi@wchscu.cn

Phone: +86-28-8542-3593

Address: Department of Anesthesiology, Sichuan University West China Hospital, No. 37th, Guoxue Alley, Wuhou District, Chengdu 610041, Sichuan, China.

Words: 4100

## ABSTRACT

**Introduction** An increasing number of elderly patients suffer from hip diseases associated with moderate to severe perioperative pain during the accelerating global aging process. Optimal analgesia can decrease perioperative complications and facilitate elderly patients' perioperative recovery. Pericapsular nerve group (PENG) block is a relatively new, analgesia adequate, and motor-sparing block technique for perioperative pain management of hip diseases. However, the efficacy of PENG block remains unclear as the limited clinical evidence. Then, we will perform a protocol for a systematic review and meta-analysis to identify the efficacy of PENG block for perioperative pain management.

**Methods and analysis** PubMed, Ovid Medline, Cochrane Library, Embase, Web of Science, China National Knowledge Infrastructure, Chinese BioMedical Literature, Wanfang, and VIP databases will be searched from inception to August 2022 to identify randomized controlled trials of elderly patients accepting PENG block for hip diseases. The primary outcome will be the pain intensity after pain management. Secondary outcomes will be quadriceps strength, perioperative rescue analgesia information and perioperative complications. Assessment of heterogeneity will be primarily inspected by forest plots. If there is no indication of funnel plot asymmetry, a random-effects meta-analysis will be performed. The Cochrane risk-of-bias tool, GRADE (Grading of



1  
2  
3  
4 Recommendations Assessment, Development, and Evaluation) and trial  
5  
6 sequential analysis will be conducted to evaluate the evidence quality and  
7  
8 control the random errors. Funnel plots and Egger's regression test will be  
9  
10 performed to evaluate publication bias.  
11  
12

13  
14 **Ethics and dissemination** Ethical approval was not required for this  
15  
16 systematic review protocol. The results will be disseminated through peer-  
17  
18 reviewed publications.  
19  
20

21  
22 **Keywords** pericapsular nerve group block, hip, elderly, meta-analysis,  
23  
24 randomized controlled trial.  
25  
26

27 **PROSPERO registration number** CRD42022313895  
28  
29

### 30 **Strengths and limitations of the study**

31  
32 ▶ Application of Preferred Reporting Items for Systematic Review and  
33  
34 Meta-Analysis Protocols (PRISMA-P) guidelines for a better quality of  
35  
36 meta-analytical results.  
37  
38

39  
40 ▶ Control of random errors with trial sequential analysis by calculating  
41  
42 the diversity adjusted information size for the outcomes.  
43  
44

45  
46 ▶ Application of Funnel plots and Egger's regression test for publication  
47  
48 bias.  
49

50  
51 ▶ Subgroup analysis based on patients' age, types of hip disease or surgery,  
52  
53 perioperative period, type of anesthesia, and perioperative pain  
54  
55 management techniques for heterogeneity assessment.  
56  
57  
58  
59  
60

## INTRODUCTION

The global population over 60 years old is estimated to increase to 2.1 billion in 2050 (approximately 22% of the global population) and 3.1 billion by 2100.<sup>1</sup> With this accelerating aging process, an increasing number of elderly patients suffer from hip diseases such as hip fractures, and hip osteoarthritis.<sup>2-4</sup> Hip surgery, including hip arthroplasty, hip fracture internal fixation and hip arthroscopy procedures are the main treatments for hip diseases.<sup>5-8</sup> Hip surgery is often associated with moderate to severe postoperative pain, particularly in hip fracture patients undergoing surgical treatment, and severe pain persists throughout the perioperative period.<sup>9-11</sup> As a minimally invasive approach, arthroscopic hip surgery is gaining popularity globally.<sup>12</sup> Despite being minimally invasive, patients undergoing arthroscopic hip surgery may still experience severe pain after the procedure.<sup>13</sup>

Perioperative pain, if inadequately controlled, can increase the risk of perioperative complications (including delirium, pulmonary complications, and cardiovascular events), delay ambulation, decrease short-term mobility, interfere with rehabilitation, increase hospital length of stay, and even increase the mortality and morbidity, leading to poor functional prognosis.<sup>14-19</sup> In elderly patients, the risk of perioperative adverse events is higher due to polypharmacy and multimorbidity.<sup>20-22</sup> In contrast, adequate pain management has been shown to facilitate postoperative

1  
2  
3  
4 mobilization, improve mobility and promote better functional recovery.<sup>23-</sup>  
5

6  
7 <sup>26</sup> Early mobilization has been associated with reducing postoperative  
8  
9 complications, including pneumonia, venous thromboembolism, pressure  
10  
11 ulcers, and delirium.<sup>27-29</sup> Therefore, optimal perioperative analgesia can  
12  
13 facilitate elderly patients' perioperative recovery.<sup>30-33</sup>  
14  
15

16  
17 Traditionally, opioid analgesia is considered the basis of perioperative  
18  
19 pain management.<sup>34-37</sup> However, opioid-related complications such as  
20  
21 delirium, urinary retention, nausea, constipation and respiratory depression  
22  
23 may occur and can delay patients' recovery and discharge.<sup>38-43</sup> Considering  
24  
25 these adverse events, especially the higher incidence of cognitive deficits  
26  
27 in elderly patients suffering a hip fracture, opioid analgesics are often  
28  
29 selected hesitantly.<sup>44-48</sup> In addition, in light of the current opioid crisis,  
30  
31 strategies to minimize opioid use, including the use of multimodal  
32  
33 perioperative pain management strategies with opioid-sparing oral and  
34  
35 intravenous medications, regional anesthesia and analgesic techniques  
36  
37 have become an increasing clinical focus in hip surgical procedures in  
38  
39 elderly patients.<sup>49-53</sup>  
40  
41  
42  
43  
44  
45  
46  
47

48  
49 Peripheral nerve blocks (including lumbar plexus block, femoral  
50  
51 nerve block, fascia iliac compartment block, 3-in-1 femoral nerve block,  
52  
53 sacral plexus block, obturator block, and sciatic nerve block) and some  
54  
55 inter-fascial plane blocks (such as quadratus lumborum block) have also  
56  
57 been suggested to decrease postoperative pain and opioid use during hip  
58  
59  
60

1  
2  
3  
4 surgery.<sup>54-61</sup> However, peripheral nerve blocks may induce weakness of the  
5  
6 quadriceps muscles, delay hospital discharge, and even predispose the  
7  
8 patient to fall.<sup>62-65</sup> In some cases, it is difficult to position the patient as the  
9  
10 extreme pain, particularly in hip fractures, accompanied by the deep depth  
11  
12 of the block target, the lumbar plexus or quadratus lumborum block will  
13  
14 become difficult.<sup>66-68</sup> In addition, another difficulty of adequate regional  
15  
16 analgesia for hip pain is the complex innervation of the hip joint.<sup>69</sup> High  
17  
18 branches of the femoral and obturator nerves provide innervation to the  
19  
20 anterior hip capsule. The accessory obturator nerve was also found to  
21  
22 innervate the medial capsule.<sup>70 71</sup> In this situation, the coverage of the  
23  
24 articular nerve supply to the hip joint is critical for adequate analgesia.  
25  
26 Hence, a simple, easy-to-perform, analgesia adequate, and motor-sparing  
27  
28 regional analgesia technique is the ideal regional analgesia technique for  
29  
30 hip surgery.  
31  
32  
33  
34  
35  
36  
37  
38  
39

40 Pericapsular nerve group (PENG) block is a relatively new peripheral  
41  
42 nerve block technique, first described by Giron-Arango in patients with hip  
43  
44 fractures, which was based on the complex innervation of the hip joint.<sup>72</sup>  
45  
46 The target of the PENG block is the musculofascial plane between the  
47  
48 psoas tendon anteriorly and the pubic ramus posteriorly. It can be easily  
49  
50 performed in the supine position, avoiding the additional pain from  
51  
52 positioning the patient for peripheral nerve block.<sup>73-76</sup> In theory, PENG  
53  
54 block has potential advantages over traditional forms of regional analgesia  
55  
56  
57  
58  
59  
60

1  
2  
3  
4 for pain originating from the hip, as local anesthetic deposits in this target  
5  
6 could provide a broader and more complete block effect on the coverage  
7  
8 area of sensory nerves innervating the hip.<sup>77-87</sup> Thus, it has the potential  
9  
10 advantage of reducing postoperative pain without motor-blocking.<sup>88-91</sup>  
11  
12 PENG block has been described as easy to perform in the supine position  
13  
14 and as an effective and motor-sparing regional analgesia technique for hip  
15  
16 surgery.<sup>92-95</sup>  
17  
18  
19  
20  
21

22 The excellent analgesic benefit of PENG block for perioperative  
23  
24 analgesia in hip surgery was highlighted in a significant number of  
25  
26 publications of case reports, case series, reviews and retrospective studies  
27  
28 <sup>77-83, 92-95</sup>, but prospective and randomized controlled trials are rare.<sup>84-87</sup>  
29  
30 Inadvertent quadriceps weakness was also reported in patients following  
31  
32 the PENG block.<sup>96-98</sup> Due to limited clinical evidence, the efficacy and  
33  
34 safety of the PENG block, particularly the efficacy of motor function  
35  
36 preservation and the incidence of block-related adverse events remain  
37  
38 controversial until now.<sup>99-103</sup>  
39  
40  
41  
42  
43  
44

45 Therefore, it is necessary to conduct a systematic review and meta-  
46  
47 analysis to analyze the clinical efficacy of PENG block on perioperative  
48  
49 pain management in elderly patients with hip diseases. The outcomes of  
50  
51 this systematic review will provide evidence for better clinical decision-  
52  
53 making and possible future directions for further clinical trials.  
54  
55  
56  
57

## 58 Objectives

59  
60

1  
2  
3  
4 We are performing this protocol of systematic review with meta-  
5  
6 analysis and trial sequential analysis (TSA) of randomized clinical trials to  
7  
8 evaluate the clinical efficacy and safety of PENG block on perioperative  
9  
10 pain management in elderly patients with hip diseases.  
11  
12

## 13 14 **METHODS AND ANALYSIS**

### 15 16 17 **Design and registration of the review**

18  
19 We devised this protocol according to the Preferred Reporting Items  
20  
21 for Systematic Reviews and Meta-Analyses Protocols (PRISMA-P)  
22  
23 guidelines registered with PROSPERO 2022 (registration number:  
24  
25 CRD42022313895).<sup>104</sup> We will perform this systematic review and meta-  
26  
27 analysis based on the Cochrane Handbook and report the results following  
28  
29 the PRISMA statement.<sup>105 106</sup> This study is anticipated to begin searching  
30  
31 in August 2022 and will be completed in January 2023.  
32  
33  
34  
35  
36

### 37 38 **Inclusion criteria for study selection**

#### 39 40 **Types of studies**

41  
42 Only randomized controlled trials (RCTs) involving the clinical  
43  
44 efficacy of PENG block on perioperative pain management in elderly  
45  
46 patients with hip diseases will be included. There will be no language  
47  
48 restrictions.  
49  
50

51  
52 The exclusion criteria were as follows: (1) studies comparing PENG  
53  
54 block versus PENG block combined with other analgesic techniques, or  
55  
56 studies comparing PENG block under different guidance techniques  
57  
58  
59  
60

1  
2  
3  
4 (ultrasound guided or traditional landmark technique); (2) studies with data  
5  
6 that could not be used for statistical analysis, or studies with incomplete  
7  
8 data, or data that could not be extracted after contacting the original authors;  
9  
10 and (3) studies that were duplicate publications, published as letters or  
11  
12 editorials, abstracts from conferences, and reviews.  
13  
14  
15

### 16 17 **Types of participants**

18  
19 Elderly participants ( $\geq 65$  years old) with any hip disease (such as hip  
20  
21 fracture, or hip osteoarthritis) accepting PENG block for perioperative pain  
22  
23 management (including preoperative analgesia, intraoperative anesthesia  
24  
25 management, and postoperative analgesia) will be included. There will be  
26  
27 no limitations on participants' gender, ethnicity, body mass index (BMI),  
28  
29 or American Society of Anesthesiologists (ASA) classification.  
30  
31  
32  
33  
34

### 35 36 **Types of interventions/controls**

37  
38 The intervention group will be the participants who received any kind  
39  
40 of PENG block (including ultrasound-guided, X-ray-guided, CT-guided or  
41  
42 traditional landmark-based techniques), alone or in combination with any  
43  
44 other kind of analgesia technique for perioperative pain management,  
45  
46 while the control group will receive any kind of analgesia technique other  
47  
48 than PENG block for perioperative pain management.  
49  
50  
51  
52

### 53 54 **Types of outcome measures**

#### 55 56 **Primary outcomes**

57  
58 The primary outcome will be the pain intensity after perioperative  
59  
60

1  
2  
3  
4 pain management by PENG block or other analgesia techniques. Pain  
5  
6 intensity, including preoperative and postoperative pain intensity will be  
7  
8 included and assessed by visual analog scale (VAS) scores, numeric rating  
9  
10 scale (NRS) scores or other scale scores. Perioperative static and dynamic  
11  
12 pain intensity after pain management will also be included if possible.  
13  
14  
15

## 16 **Secondary outcomes**

17  
18  
19 **1. Unexpected perioperative femoral nerve block** will be evaluated as  
20  
21 follows if possible.  
22

23  
24 ➤ Incidence of quadriceps motor block (defined as paresis or paralysis of  
25  
26 knee extension and hip adduction) [Knee extension was graded  
27  
28 according to a 3-point scale: 0=normal strength (extension against  
29  
30 gravity and resistance)]; 1=paresis (extension against gravity but not  
31  
32 against resistance); 2=paralysis (no extension possible).<sup>107</sup> Hip  
33  
34 adduction scores of 0, 1, and 2 points indicated decreases in strength of  
35  
36 0%-20%, 21%-70%, and 71%-90% compared with baseline  
37  
38 measurement, respectively.<sup>108</sup>  
39

40  
41 ➤ Mobility of the quadriceps as defined by the Medical Research Council  
42  
43 (MRC) scale.<sup>109</sup>  
44

45  
46 ➤ Quadriceps strength was assessed by measuring the force produced by  
47  
48 voluntary isometric contractions with any type of reliable and valid  
49  
50 stationary dynamometer (such as the Chatillon DPPH-250 force gauge,  
51  
52 AMETEK, USA or Chatillon; AMETEK, Largo, Florida; Lafayette  
53  
54  
55  
56  
57  
58  
59  
60



Instrument, Lafayette, Indiana; and MicroFET, Hoggan Health Industries, West Jordan, Utah).<sup>110 111</sup>

## 2. Perioperative rescue analgesia information

- Perioperative cumulative analgesic consumption: cumulative analgesic consumption for intraoperative anesthesia and cumulative rescue analgesics for preoperative/postoperative analgesia will be included if possible. Any kind of analgesics, such as opioid analgesics and non-steroidal analgesics administered by different delivery methods, such as PCA (patient-controlled analgesia) devices, intravenous, oral, or intramuscular will be included if possible.
- Time to first analgesic request: time from the end of the preoperative pain management procedure to the first analgesic request or time from the end of surgery to the first analgesic request will be included if possible.

## 3. Perioperative complications: if possible

- Block-related adverse events included vascular puncture, paresthesia, local anesthetic toxicity, anaphylaxis, permanent nerve injury, bleeding, or infection.
- Intraoperative adverse effects included hypoxemia (oxygen saturation less than 90% or oxygen partial arterial pressure  $\leq 60$  mmHg); hypotension (defined as a decrease of  $>20\%$  from preanesthetic patient baseline values or a systolic blood pressure less than 90 mmHg);

1  
2  
3  
4 arrhythmia [including bradycardia (defined as HR <55 beats/min);  
5  
6 tachycardia (defined as HR>100 beats/min); any other types of  
7  
8 arrhythmias]; and blood loss.

- 9  
10  
11  
12 ➤ Other adverse effects: including postoperative nausea/vomiting,  
13  
14 pruritus, urinary retention, respiratory depression, sweating, dizziness,  
15  
16 pruritus, urticaria, postoperative arrhythmia, and postoperative  
17  
18 pulmonary complications, were defined as the composite of any  
19  
20 respiratory infection, respiratory failure, pleural effusion, atelectasis,  
21  
22 or pneumothorax.

- 23  
24  
25  
26  
27 **4. Patients' recovery:** Length of stay, recovery time (defined as the time  
28  
29 until recovery room discharge criteria were met after surgery), the  
30  
31 quality of postoperative recovery score (such as the Quality of  
32  
33 Recovery-40 questionnaire)<sup>112</sup> and patients' ambulation (such as time-  
34  
35 to-first ambulation and initial ambulation distance) will be included if  
36  
37 possible.

38  
39  
40  
41  
42  
43 **5. Patient satisfaction:**

44  
45 If possible, patient satisfaction with performing the perioperative pain  
46  
47 management techniques or postoperative analgesia will be included.  
48  
49 Satisfaction could be measured by a 5-point Likert scale (1=very  
50  
51 dissatisfied; 2=dissatisfied; 3=neutral; 4=satisfied; 5= very satisfied), 10-  
52  
53 point Likert scale (1= completely unsatisfied; 10=completely satisfied) or  
54  
55  
56  
57  
58  
59  
60

1  
2  
3  
4 a postoperative questionnaire whether the patient would choose the same  
5  
6 anesthetic or analgesia handling by the answer of “yes” or “no”.<sup>113</sup>  
7  
8

### 9 **Exploratory outcomes**

- 10  
11
- 12 **1. Perioperative sensory block:** Sensory block was evaluated using a 3-  
13  
14 point scale [0=no block, 1=analgesia (patient can feel touch, not cold),  
15  
16 2=anesthesia (patient cannot feel touch)], which was assessed in the  
17  
18 anterior, lateral and medial aspects of the mid-thigh.<sup>107</sup>  
19
  - 20 **2. Block ended time:** defined as the return of motor (if initially impaired)  
21  
22 and/or sensory function, which was acquired from patients’ recall.  
23  
24
  - 25 **3. Perioperative mortality** was defined as all-cause death during the  
26  
27 operation procedure, within 30 days after surgery, or death during  
28  
29 hospitalization.  
30  
31  
32  
33

### 34 **Search strategy**

35  
36  
37 Two reviewers (Z-JQ and DL) will independently conduct the search,  
38  
39 and any disagreements will be resolved by consulting a third reviewer (Z-  
40  
41 WY) as much as possible. English and Chinese electronic databases will  
42  
43 be searched for published literature from inception to August 2022.  
44  
45 PubMed, Ovid Medline, Cochrane Library, Embase, and Web of Science  
46  
47 will be included in the English databases. The Chinese BioMedical  
48  
49 Literature (Sino-Med), China National Knowledge Infrastructure (CNKI),  
50  
51 Wanfang database and VIP Database will be included in the Chinese  
52  
53 databases. The trial registry database (Clinical Trials.gov and WHO  
54  
55  
56  
57  
58  
59  
60

1  
2  
3  
4 International Clinical Trials Registry Platform) will also be scrutinized to  
5  
6 avoid missing ongoing or unpublished clinical trials. In addition, reference  
7  
8 lists of each study will also be scanned for missing studies.  
9  
10

11 The search strategy will use the following search terms: pericapsular  
12  
13 nerve group block, PENG block, elderly, hip, and randomized controlled  
14  
15 trial. Related search terms will also be translated into Chinese for literature  
16  
17 research and study identification in Chinese databases. The search  
18  
19 strategies are listed in Supplementary Appendix file 1. Comprehensive  
20  
21 updating of the literature search results will be performed prior to the final  
22  
23 publication of systematic reviews to avoid missing published studies  
24  
25 during the systematic review preparation.  
26  
27  
28  
29  
30

## 31 32 **Data collection and analysis**

### 33 34 **Selection of studies**

35  
36 At least two review authors (Z-JQ and DL) will be responsible for  
37  
38 screening the potentially eligible studies by reading titles and abstracts. All  
39  
40 identified and relevant full-text publications will be retrieved by screening  
41  
42 the full text thoroughly, and the reasons for excluding the ineligible studies  
43  
44 will be recorded. Any disagreement will be resolved through discussion or  
45  
46 by consulting a third review author (Z-JQ and CG) as much as possible. A  
47  
48 fourth reviewer (Z-WY) will carefully check out all procedures before the  
49  
50 final confirmation of the data extraction. Data extraction will be performed  
51  
52 by at least two authors, and a third author will be consulted if there is any  
53  
54  
55  
56  
57  
58  
59  
60

1  
2  
3  
4 disagreement. Duplicate publications and companion papers of the same  
5  
6 trial will be assessed by all review authors. The study selection process is  
7  
8 displayed in the PRISMA flow diagram (figure 1).  
9  
10

## 11 **Data extraction**

12  
13  
14 Two review authors (Z-JQ and ZL) will use a standardized data  
15  
16 collection form (Excel version 2013, Microsoft Inc, Washington DC, USA)  
17  
18 for data extraction from each included study. The data extraction form  
19  
20 included participants' demographic data, type of hip disease or hip surgery,  
21  
22 type of anesthesia: local, spinal or general anesthesia, period of  
23  
24 perioperative pain management (preoperative analgesia, intraoperative  
25  
26 anesthesia and postoperative analgesia), inclusion and exclusion criteria,  
27  
28 detailed information of analgesia techniques (type of perioperative  
29  
30 analgesia techniques: PENG block or other analgesia techniques; type,  
31  
32 concentration, dose, volume and adjuvant of local anesthetics), and any  
33  
34 outcomes including primary, secondary, and exploratory outcomes. Study  
35  
36 design characteristics including randomization method, allocation  
37  
38 concealment, blinding (patients, treatment providers, outcome  
39  
40 investigators), incomplete outcome data collection and statistical analysis,  
41  
42 and outcome reporting) will be recorded simultaneously. Continuous and  
43  
44 dichotomous data will be recorded as the mean $\pm$  SD and the percentages  
45  
46 or the proportion. If necessary, a third review author (D-XQ) will cross-  
47  
48 check the data to ensure precision. When the necessary information or data  
49  
50  
51  
52  
53  
54  
55  
56  
57  
58  
59  
60

for analysis is missing or incomplete, we will contact the corresponding author of the research via email for the original data as much as possible. Necessary numerical data in the graphs will be extracted by Adobe Photoshop if necessary.<sup>114</sup> Extracted information and data are presented in table 1.

**Table 1** Information and data extraction schedule

| Subject                 | Content                                                                                                                                                                                                                                                                                                                                                                                                                                        |
|-------------------------|------------------------------------------------------------------------------------------------------------------------------------------------------------------------------------------------------------------------------------------------------------------------------------------------------------------------------------------------------------------------------------------------------------------------------------------------|
| Publication information | Title; author; Publish year; Country of origin; Corporate sponsorship; Contact email.                                                                                                                                                                                                                                                                                                                                                          |
| Participant             | Sample size; Age; Sex; Height and weight or BMI; ASA physical status classification levels; Type of hip disease or hip surgery; Inclusion and exclusion criteria if necessary.                                                                                                                                                                                                                                                                 |
| Intervention            | Detail information of PENG block techniques (guidance techniques; target area of block; block needle; needle tracking techniques: in-plane and out-of-plane) Detail information of local anesthetics (type, concentration, dose, volume and adjuvant of local anesthetics).                                                                                                                                                                    |
| Control                 | Detail information of block analgesia techniques (including guidance techniques; target area of block; block needle; needle tracking techniques: in-plane and out-of-plane; detail information of local anesthetics including type, concentration, dose, volume and adjuvant of local anesthetics) and non-block analgesia techniques (including type, dose, and administration method of analgesics).                                         |
| Outcome                 | Primary outcome (pain intensity after perioperative pain management); Secondary outcome measurements (perioperative quadriceps strength; perioperative rescue analgesia information: perioperative cumulative analgesic consumption; time to first analgesic request; patients' recovery; perioperative complications; patients' satisfaction); Exploratory outcomes (perioperative sensory block; block ended time; perioperative mortality). |
| Study design            | Randomization method; Blinding; Allocation concealment; Statistical analysis; Sample size calculation; Outcome reporting.                                                                                                                                                                                                                                                                                                                      |
| Other information       | Type of anesthesia: local, spinal or general anesthesia; Period of perioperative pain management (preoperative analgesia, intraoperative anesthesia and postoperative analgesia); Anesthesia time; Operation time; Assessment method or equipment of outcomes.                                                                                                                                                                                 |

## Quality assessment

The risk of bias in each included study will be assessed independently by two review authors (DL and ZL) under the guidance of the Cochrane

1  
2  
3  
4 risk of bias tool.<sup>115</sup> Methodology (including random sequence generation,  
5  
6 allocation concealment, blinding of participants and personnel, blinding of  
7  
8 outcome assessment, incomplete outcome data, selective outcome  
9  
10 reporting, other risks of bias, and overall risk of bias) will be evaluated.  
11  
12 Each included study will be assessed by the risk of bias assessment tool  
13  
14 from the Cochrane Handbook for Systematic Reviews of Interventions and  
15  
16 then categorized into three levels (low risk of bias, unclear of bias, and high  
17  
18 risk of bias).<sup>105,116,117</sup> Any discrepancies will be settled through discussions  
19  
20 by all review authors or arbitration of a third reviewer (Z-WY). Assessment  
21  
22 of risk of bias is listed in Supplementary Appendix file 2.  
23  
24  
25  
26  
27  
28  
29

### 30 **Measures of treatment effect**

31  
32 Mean differences (MDs) with 95% confidence intervals (CIs) will be  
33  
34 used for continuous outcome data reported by the same scale, and  
35  
36 standardized mean differences (SMDs) with 95% confidence intervals (CIs)  
37  
38 will be used for continuous outcome data reported by different scales. The  
39  
40 relative risks (RRs) with 95% CIs will be used for dichotomous outcome  
41  
42 data.  
43  
44  
45  
46  
47

### 48 **Assessment of heterogeneity**

49  
50 The application of a fixed-effects model or random-effects model  
51  
52 based on statistical heterogeneity is not recommended by the Cochrane  
53  
54 guidelines.<sup>105</sup> Assessment of heterogeneity will be primarily inspected by  
55  
56 forest plots. If there is no indication of funnel plot asymmetry, a random-  
57  
58  
59  
60

1  
2  
3  
4 effects meta-analysis will be performed.<sup>105</sup> If there is an indication of  
5  
6 funnel plot asymmetry, then both a fixed-effect and a random-effect meta-  
7  
8 analysis are problematic. In this situation, a sensitivity analysis will be  
9  
10 performed by excluding small studies or meta-regression will be addressed  
11  
12 directly. A P value <0.05 was assumed to be statistically significant.  
13  
14  
15

### 16 **Trial Sequential Analysis**

17  
18  
19 The required information size (RIS) will be calculated to correct the  
20  
21 risks of random errors by trial sequential analysis (TSA) using the TSA  
22  
23 program version 0.9.5.10 Beta (Copenhagen Trial Unit, Copenhagen,  
24  
25 Denmark).<sup>118-120</sup> TSA program version is available at  
26  
27 <http://www.ctu.dk/tsa>.<sup>121</sup> Each outcome will be detected by RIS, the  
28  
29 cumulative Z-curve, and the TSA monitoring boundaries.<sup>122 123</sup>  
30  
31  
32  
33

34  
35 For continuous outcomes, the observed SD, a mean difference of the  
36  
37 observed SD/2 (clinically meaningful value), an alpha (type I error) of  
38  
39 2.5%, and a beta (type II error) of 10% will be used in the TSA.<sup>124</sup> For  
40  
41 dichotomous outcomes, the proportion or percentage from the control  
42  
43 group, a relative risk variation of 20% (clinically meaningful value), an  
44  
45 alpha (type I error) of 2.5%, and a beta (type II error) of 10% will be used  
46  
47 in the TSA.<sup>125</sup>  
48  
49  
50  
51

### 52 **Subgroup analysis**

53  
54  
55 The results will be comprehensively interpreted through an analysis  
56  
57 of subgroups or subsets as much as possible. If sufficient trials are available,  
58  
59  
60



1  
2  
3  
4 data from different participants' ages, different types of hip disease or  
5  
6 different kinds of surgical techniques of hip surgery, pain management  
7  
8 during different perioperative periods, different pain management  
9  
10 techniques in the control group, different types of anesthesia, and different  
11  
12 types, concentrations, doses, volumes, and adjuvants of local anesthetics  
13  
14 for PENG block will be analyzed independently.  
15  
16  
17

18  
19  
20 ▶ Different participants' ages (PENG block for perioperative analgesia in  
21  
22 elderly patients with different ages as follows:  $65 \text{ years} \leq \text{Patients} < 75 \text{ years}$ ;  
23  
24  $75 \text{ years} \leq \text{Patients} < 80 \text{ years}$ ;  $\text{Patients} \geq 80 \text{ years}$ ).

25  
26  
27 ▶ Different types of hip disease or different kinds of surgical techniques  
28  
29 of hip surgery (hip disease, such as hip fracture and hip osteoarthritis; hip  
30  
31 surgery, such as different kinds of surgical techniques of hip arthroplasty,  
32  
33 hip fracture fixation, and hip arthroscopy procedures).  
34  
35

36  
37  
38 ▶ Pain management of different perioperative periods (PENG block for  
39  
40 preoperative analgesia, intraoperative anesthesia, and postoperative  
41  
42 analgesia).  
43  
44

45  
46 ▶ Different pain management techniques in the control group (such as  
47  
48 block analgesia techniques, including lumbar plexus block, femoral nerve  
49  
50 block, fascia-iliac compartment block, 3-in-1 femoral nerve block, sacral  
51  
52 plexus block, obturator and sciatic nerve block, and quadratus lumborum  
53  
54 block. Non-block analgesia techniques such as opioid and no-opioid  
55  
56 analgesics).  
57  
58  
59  
60

1  
2  
3  
4 ▶ Different types of anesthesia (such as local anesthesia, spinal anesthesia  
5  
6 or general anesthesia).

7  
8  
9 ▶ Different volumes, concentrations, doses, and adjuvants of local  
10  
11 anesthetics for PENG block.

12  
13  
14 The interaction p value will be considered to test the statistically  
15  
16 significant subgroup difference; if testing for interaction  $p < 0.05$  (a  
17  
18 significant difference between subgroups exists), the results for individual  
19  
20 subgroups will be reported separately.<sup>105</sup>

### 21 22 23 24 **Sensitivity analysis**

25  
26  
27 Sensitivity analysis will be applied after the analysis of subgroups or  
28  
29 subsets to evaluate the stability of the combined results, which could be  
30  
31 affected by uncertain assumptions of data and usage. Significant changes  
32  
33 in the pooled results may indicate significant heterogeneity in the included  
34  
35 studies. Low-quality studies, defined as high-risk bias studies according to  
36  
37 the Cochrane risk of bias tool assessment, will be excluded. Then, the  
38  
39 included studies will be re-analyzed to detect obvious differences between  
40  
41 the combined effects. The stability of the pooled estimations will be  
42  
43 detected by removing each included study if necessary.

### 44 45 46 47 **Assessment of publication biases**

48  
49  
50  
51  
52  
53 Egger's regression test and funnel plot analysis will be performed to  
54  
55 estimate the potential publication bias, while more than ten original studies  
56  
57 involved an outcome.<sup>126 127</sup> The symmetric pattern of the funnel plot by  
58  
59  
60

1  
2  
3  
4 trim-and-fill analysis will also be used to confirm the potential publication  
5  
6 bias. The effect sizes of each included study will normally be  
7  
8 symmetrically distributed around the center of a funnel plot in the absence  
9  
10 of publication bias.<sup>128</sup> Publication biases will be detected by Stata/MP 16.0  
11  
12 (Stata Corp, College Station, TX, USA).  
13  
14  
15

### 16 **Grading the quality of evidence**

17  
18  
19 The quality of evidence for each outcome will be assessed using the  
20  
21 Grading of Recommendations Assessment, Development and Evaluation  
22  
23 (GRADE) criteria.<sup>129</sup> The quality of effect estimates will be classified as  
24  
25 high, moderate, low or very low depending on the risk of bias, consistency,  
26  
27 directness, precision and publication bias.<sup>129</sup> Data from randomized  
28  
29 controlled trials are classified as high-quality evidence according to  
30  
31 GRADE. However, it can be degraded according to the risk of bias,  
32  
33 imprecision, inconsistency, indirectness, or publication bias.  
34  
35  
36  
37  
38  
39

### 40 **Patient and public involvement statement**

41  
42  
43 Patients or the public were not involved in the design, conduct,  
44  
45 reporting, or dissemination plans of our research.  
46  
47

## 48 **DISCUSSION**

49  
50  
51 More and more elderly patients suffer from hip diseases in the global  
52  
53 accelerating aging process. As the main therapy for hip diseases, hip  
54  
55 surgery is often associated with moderate to severe perioperative pain.  
56  
57  
58 Optimal perioperative analgesia can decrease the risk of perioperative  
59  
60

1  
2  
3  
4 complications and facilitate elderly patient perioperative recovery. Opioid  
5  
6 analgesics are often selected hesitantly as opioid-related complications,  
7  
8 which can delay patient recovery and discharge. Regional anesthesia and  
9  
10 analgesic techniques for perioperative pain management have gradually  
11  
12 become the clinical focus in elderly patients with hip diseases to facilitate  
13  
14 patient recovery. A simple, easy-to-perform, adequate analgesia and  
15  
16 motor-sparing regional analgesia technique is ideal for perioperative pain  
17  
18 management of hip diseases.  
19  
20  
21  
22  
23

24  
25 The PENG block is a relatively new, easy-to-perform, analgesia  
26  
27 adequate, and motor-sparing peripheral nerve block technique. The benefit  
28  
29 of PENG block for perioperative analgesia in hip surgery was based on  
30  
31 many publications of case reports, case series, reviews, and retrospective  
32  
33 studies. However, prospective and randomized controlled trials are rare.  
34  
35 Due to the limited clinical evidence, the efficacy and safety of the PENG  
36  
37 block remain unclear.  
38  
39  
40  
41  
42

43 This systematic review will provide an overview of the current state  
44  
45 of evidence on the clinical efficacy and safety of the PENG block for  
46  
47 perioperative analgesia in elderly patients with hip disease. We will  
48  
49 examine the perioperative analgesia efficacy, the advantage of motor  
50  
51 function preservation and the incidence of block-related adverse events of  
52  
53 PENG block. The results of this systematic review will facilitate clinical  
54  
55 decision-making on better perioperative pain management of elderly  
56  
57  
58  
59  
60

1  
2  
3  
4 patients with hip disease.  
5

6 This systematic review protocol was rigorously performed according  
7 to the Preferred Reporting Items for Systematic Review and Meta-  
8 Analyses Protocols (PRISMA-P) guidelines. The strengths of our  
9 systematic review are as follows: First, a comprehensive literature search  
10 of English and Chinese databases will be performed. Second, we will  
11 perform multivariable analysis (including subgroup analysis, trial  
12 sequential analysis for random errors, sensitivity analysis, study quality  
13 assessment, funnel plots, and Egger's regression test for publication bias)  
14 to improve the quality of the evidence. Third, literature retrieval, data  
15 extraction, and study quality assessment will be performed independently  
16 according to the guidelines by at least two review authors. Any  
17 disagreement will be resolved through discussion or by consulting another  
18 review author as much as possible.  
19  
20  
21  
22  
23  
24  
25  
26  
27  
28  
29  
30  
31  
32  
33  
34  
35  
36  
37  
38  
39

40 Limitations are as follows: First, studies with different perioperative  
41 periods, hip diseases, or hip surgeries will be included, leading to potential  
42 heterogeneity. Second, PENG block is a relatively new peripheral nerve  
43 block technique, so the sample size of each included study may be limited,  
44 and the number of studies with available data for subgroup analyses may  
45 be small. Third, studies with high-level evidence such as well-designed  
46 randomized controlled trials with double-blind designs may be limited, as  
47 it is difficult to perform blinding for different block techniques in different  
48  
49  
50  
51  
52  
53  
54  
55  
56  
57  
58  
59  
60

1  
2  
3  
4 puncture positions. Fourth, PENG block is a relatively new peripheral  
5  
6 nerve block technique. It is difficult to define a significant clinical plausible  
7  
8 value of mean difference and relative risk increase/decrease during  
9  
10 literature research or clinical experience. Therefore, a significant clinical  
11  
12 plausible value will be defined according to TSA guidelines.  
13  
14  
15

## 16 **ETHICS AND DISSEMINATION**

17  
18  
19 Ethical approval was not required for this systematic review protocol.  
20  
21  
22 The findings will be disseminated through peer-reviewed publications.  
23  
24

### 25 **Timelines**

26  
27 Formal screening of search results will begin in August 2022. Data  
28  
29 extraction will begin in November 2022. The project will be complete in  
30  
31  
32 January 2023.  
33  
34

### 35 **Author Contributions**

36  
37 Z-JQ and DL conceived the idea for this systematic review. All  
38  
39 authors (Z-JQ, DL, CG, ZL, D-XQ, Z-WY) developed the methodology  
40  
41 for the systematic review. The manuscript was drafted by Z-JQ and DL,  
42  
43 and revised by all authors. CG and Z-WY will screen potential studies, and  
44  
45 perform duplicate independent data abstraction. Z-JQ and ZL will  
46  
47 undertake a risk of bias assessment and assess the evidence quality. Z-JQ  
48  
49 and DL will conduct the data synthesis. All authors contributed to the  
50  
51 research and agreed to be responsible for all aspects of the work.  
52  
53  
54  
55  
56  
57

### 58 **Funding**

59  
60 None.

## Competing interests

None declared.

## Data availability statement

Not applicable for this protocol.

## Patient consent for publication

No patient was involved.

## Provenance and peer review

Not commissioned; externally peer reviewed.

## REFERENCES

- 1 World Health Organization. Ageing and health. 2020. <https://www.who.int/news-room/fact-sheets/detail/ageing-and-health>. Accessed May 28, 2022.
- 2 Centers for Disease Control and Prevention. Injury prevention & control: hip fractures among older adults. <https://www.cdc.gov/falls/hip-fractures.html>. Accessed May 28, 2022.
- 3 Katz JN, Arant KR, Loeser RF. Diagnosis and Treatment of Hip and Knee Osteoarthritis: A Review. *JAMA* 2021; 325:568-78.
- 4 Fu M, Zhou H, Li Y, *et al*. Global, regional, and national burdens of hip osteoarthritis from 1990 to 2019: estimates from the 2019 Global Burden of Disease Study. *Arthritis Res Ther* 2022; 24:8.
- 5 Hasan K, Shankar S, Sharma A, *et al*. Hip surgery and its evidence base: progress over a decade? *J Orthop Traumatol* 2016;17: 291-95.
- 6 Antoniou J, Silotch C, Epure LL, *et al*. Elective Total Hip Arthroplasties in Nonagenarians-Age Does Matter: A National Surgical Quality Improvement Program Study. *J Arthroplasty* 2022: S0883-5403(22)00084-5.
- 7 Cui L, Zhao S, Tian H, *et al*. Curative efficacy of surgical procedures for older patients with femoral neck fracture: a network meta-analysis and systematic review. *J Orthop Surg Res* 2022; 17:127.
- 8 Cross GWV, Sobti AS, Khan T. Hip arthroscopy in osteoarthritis: Is it an option? *J Clin*

- 1  
2  
3  
4 [Orthop Trauma](#) 2021; 22:101617.
- 5  
6 9 Morrison C, Brown B, Lin DY, *et al.* Analgesia and anesthesia using the pericapsular  
7 nerve group block in hip surgery and hip fracture: a scoping review. [Reg Anesth Pain](#)  
8 [Med](#) 2021; 46: 169-75.
- 9  
10  
11 10 Abou-Setta AM, Beaupre LA, Rashid S, *et al.* Comparative effectiveness of pain  
12 management interventions for hip fracture: a systematic review. [Ann Intern Med](#) 2011;  
13 155: 234-45.
- 14  
15  
16 11 Orozco S, Muñoz D, Jaramillo S, *et al.* Pericapsular nerve group (PENG) block for  
17 perioperative pain control in hip arthroscopy. [J Clin Anesth](#) 2020; 59:3-4.
- 18  
19  
20 12 Bozic KJ, Chan V, Valone FH 3rd, *et al.* Trends in hip arthroscopy utilization in the  
21 United States. [J Arthroplast](#) 2013; 28:140-43.
- 22  
23  
24 13 Bech NH, Hulst AH, Spuijbroek JA, *et al.* Perioperative pain management in hip  
25 arthroscopy; What options are there? [J Hip Preserv Surg](#) 2016; 3:181-9.
- 26  
27  
28 14 Gan TJ. Poorly controlled postoperative pain: prevalence, consequences, and  
29 prevention. [J Pain Res](#) 2017;10: 2287-98.
- 30  
31  
32 15 Pozek JJ, De Ruyter M, Khan TW. Comprehensive Acute Pain Management in the  
33 Perioperative Surgical Home. [Anesthesiol Clin](#) 2018;36: 295-307.
- 34  
35  
36 16 Tsinaslanidis G, Tsinaslanidis P, Mahajan RH. Perioperative Pain Management in  
37 Patients Undergoing Total Hip Arthroplasty: Where Do We Currently Stand? [Cureus](#)  
38 2020; 12: e9049.
- 39  
40  
41 17 Pepper AM, Mercuri JJ, Behery OA, *et al.* Total Hip and Knee Arthroplasty  
42 Perioperative Pain Management: What Should Be in the Cocktail. [JBJS Rev](#) 2018; 6:  
43 e5.
- 44  
45  
46 18 Pyati S, Gan TJ. Perioperative pain management. [CNS Drugs](#) 2007; 21:185-211.
- 47  
48  
49 19 Morrison RS, Magaziner J, Gilbert M, *et al.* Relationship between pain and opioid  
50 analgesics on the development of delirium following hip fracture. [J Gerontol A Biol Sci](#)  
51 [Med Sci](#) 2003; 58:76e81.
- 52  
53  
54 20 Feldt KS, Oh HL. Pain and hip fracture outcomes for older adults. [Orthop Nurs](#) 2000;  
55 19:35e44.
- 56  
57  
58 21 Roche JJ, Wenn RT, Sahota O, *et al.* Effect of comorbidities and postoperative  
59  
60



- 1  
2  
3 complications on mortality after hip fracture in elderly people: prospective  
4 observational cohort study. *BMJ* 2005; 331:1374.  
5  
6  
7  
8 22 Shellito AD, Dworsky JQ, Kirkland PJ, *et al.* Perioperative Pain Management Issues  
9 Unique to Older Adults Undergoing Surgery: A Narrative Review. *Ann Surg Open*  
10 2021;2: e072.  
11  
12  
13 23 Tan M, Law LS, Gan TJ. Optimizing pain management to facilitate Enhanced  
14 Recovery After Surgery pathways. *Can J Anaesth* 2015; 62:203-18.  
15  
16  
17 24 Ranawat AS, Ranawat CS. Pain management and accelerated rehabilitation for total  
18 hip and total knee arthroplasty. *J Arthroplasty* 2007; 22:12-5.  
19  
20  
21 25 Wan HY, Li SY, Ji W, *et al.* Fascia Iliaca Compartment Block for Perioperative Pain  
22 Management of Geriatric Patients with Hip Fractures: A Systematic Review of  
23 Randomized Controlled Trials. *Pain Res Manag* 2020; 2020:8503963.  
24  
25  
26 26 Wang S, Zhang T, Wang P, *et al.* The Impact of Perioperative Multimodal Pain  
27 Management on Postoperative Outcomes in Patients (Aged 75 and Older) Undergoing  
28 Short-Segment Lumbar Fusion Surgery. *Pain Res Manag* 2022; 2022:9052246.  
29  
30  
31 27 Baer M, Neuhaus V, Pape HC, *et al.* Influence of mobilization and weight bearing on  
32 in-hospital outcome in geriatric patients with hip fractures. *SICOT J* 2019; 5:4.  
33  
34  
35 28 Guerra ML, Singh PJ, Taylor NF. Early mobilization of patients who have had a hip or  
36 knee joint replacement reduces length of stay in hospital: a systematic review. *Clin*  
37 *Rehabil* 2015; 29:844-54.  
38  
39  
40 29 Okamoto T, Ridley RJ, Edmondston SJ, *et al.* Day-of Surgery Mobilization Reduces  
41 the Length of Stay After Elective Hip Arthroplasty. *J Arthroplasty* 2016; 31:2227-30.  
42  
43  
44 30 Pepper AM, Mercuri JJ, Behery OA, *et al.* Total Hip and Knee Arthroplasty  
45 Perioperative Pain Management: What Should Be in the Cocktail. *JBJS Rev* 2018;6:  
46 e5.  
47  
48  
49 31 Ruel M, Boussat B, Boudissa M, *et al.* Management of preoperative pain in elderly  
50 patients with moderate to severe cognitive deficits and hip fracture: a retrospective,  
51 monocentric study in an orthogeriatric unit. *BMC Geriatr* 2021; 21:575.  
52  
53  
54 32 Bech NH, Hulst AH, Spuijbroek JA, *et al.* Perioperative pain management in hip  
55 arthroscopy; what options are there? *J Hip Preserv Surg* 2016; 3:181-9.  
56  
57  
58  
59  
60

- 1  
2  
3  
4 33 Karam JA, Schwenk ES, Parvizi J. An Update on Multimodal Pain Management After  
5 Total Joint Arthroplasty. *J Bone Joint Surg Am* 2021; 103:1652-62.  
6  
7  
8 34 Baker DW. History of The Joint Commission's Pain Standards: Lessons for Today's  
9 Prescription Opioid Epidemic. *JAMA* 2017; 317: 1117-18.  
10  
11 35 El Moheb M, Mokhtari A, Han K, *et al.* Pain or No Pain, We Will Give You Opioids:  
12 Relationship Between Number of Opioid Pills Prescribed and Severity of Pain after  
13 Operation in US vs Non-US Patients. *J Am Coll Surg* 2020; 231:639-48.  
14  
15  
16 36 Loh FE, Herzig SJ. Pain in the United States: Time for a Culture Shift in Expectations,  
17 Messaging, and Management. *J Hosp Med* 2019;14: 787-88.  
18  
19  
20 37 Hyland SJ, Brockhaus KK, Vincent WR, *et al.* Perioperative Pain Management and  
21 Opioid Stewardship: A Practical Guide. *Healthcare (Basel)* 2021; 9:333.  
22  
23  
24 38 Oderda GM, Senagore AJ, Morland K, *et al.* Opioid-related respiratory and  
25 gastrointestinal adverse events in patients with acute postoperative pain: prevalence,  
26 predictors, and burden. *J Pain Palliat Care Pharmacother* 2019; 33:82-97.  
27  
28  
29 39 Kane-Gill SL, Rubin EC, Smithburger PL, *et al.* The cost of opioid-related adverse drug  
30 events. *J Pain Palliat Care Pharmacother*. 2014; 28:282-93.  
31  
32  
33 40 Oderda GM, Said Q, Evans RS, *et al.* Opioid-related adverse drug events in surgical  
34 hospitalizations: impact on costs and length of stay. *Ann Pharmacother* 2007; 41:400-  
35 6.  
36  
37  
38 41 Brat GA, Agniel D, Beam A, *et al.* Postsurgical prescriptions for opioid naive patients  
39 and association with overdose and misuse: retrospective cohort study. *BMJ* 2018; 360:  
40 j5790.  
41  
42  
43 42 Brummett CM, Waljee JF, Goesling J, *et al.* New Persistent Opioid Use After Minor  
44 and Major Surgical Procedures in US Adults. *JAMA Surg* 2017;152: e170504.  
45  
46  
47 43 Chau DL, Walker V, Pai L, *et al.* Opiates and elderly: use and side effects. *Clin Interv*  
48 *Aging* 2008; 3:273.  
49  
50  
51 44 Gazelka HM, Leal JC, Lapid MI, *et al.* Opioids in Older Adults: Indications, Prescribing,  
52 Complications, and Alternative Therapies for Primary Care. *Mayo Clin Proc* 2020;  
53 95:793-800.  
54  
55  
56 45 Bitsch M, Foss N, Kristensen B, *et al.* Pathogenesis of and management strategies  
57  
58  
59  
60

- 1  
2  
3  
4 for postoperative delirium after hip fracture: a review. *Acta Orthop Scand* 2004;  
5 75:378-89.  
6  
7  
8 46 Amador LF, Goodwin JS. Postoperative delirium in the older patient. *J Am Coll Surg*  
9 2005; 200:767-73.  
10  
11  
12 47 Bicket MC, Brat GA, Hutfless S, *et al.* Optimizing opioid prescribing and pain treatment  
13 for surgery: Review and conceptual framework. *Am J Health Syst Pharm* 2019 Sep  
14 3;76(18):1403-1412.  
15  
16  
17 48 Pasero CL, McCaffery M. Reluctance to order opioids in elders. *Am J Nurs* 1997;  
18 97:20-23.  
19  
20  
21 49 Chia PA, Cannesson M, Bui CCM. Opioid free anesthesia: feasible? *Curr Opin*  
22 *Anaesthesiol* 2020; 33:512-17.  
23  
24  
25 50 Kharasch ED, Avram MJ, Clark JD. Rational Perioperative Opioid Management in the  
26 Era of the Opioid Crisis. *Anesthesiology* 2020;132: 603-05.  
27  
28  
29 51 Larach DB, Hah JM, Brummett CM. Perioperative Opioids, the Opioid Crisis, and the  
30 Anesthesiologist. *Anesthesiology* 2022; 136:594-608.  
31  
32  
33 52 Everson M, McLain N, Collins MJ, *et al.* Perioperative Pain Management Strategies in  
34 the Age of an Opioid Epidemic. *J Perianesth Nurs* 2020; 35:347-52.  
35  
36  
37 53 Bugada D, Bellini V, Lorini LF, *et al.* Update on Selective Regional Analgesia for Hip  
38 Surgery Patients. *Anesthesiol Clin* 2018; 36:403-15.  
39  
40  
41 54 68. Hogan MV, Grant RE, Lee L Jr. Analgesia for total hip and knee arthroplasty: a  
42 review of lumbar plexus, femoral, and sciatic nerve blocks. *American Journal of*  
43 *Orthopedics* 2009; 38: E129–E133.  
44  
45  
46 55 Foss NB, Kristensen BB, Bundgaard M, *et al.* Fascia iliaca compartment blockade for  
47 acute pain control in hip fracture patients: a randomized, placebo-controlled trial.  
48 *Anesthesiology* 2007; 106:773-78.  
49  
50  
51  
52 56 Haines L, Dickman E, Ayvazyan S, *et al.* Ultrasound-guided fascia iliaca compartment  
53 block for hip fractures in the emergency department. *J Emerg Med* 2012; 43:692-97.  
54  
55  
56 57 Unneby A, Svensson O, Gustafson Y, *et al.* Femoral nerve block in a representative  
57 sample of elderly people with hip fracture: a randomised controlled trial. *Injury* 2017;  
58 48:1542-49.  
59  
60

- 1  
2  
3  
4 58 Beaudoin FL, Haran JP, Liebmann O. A comparison of ultrasound-guided three-in-  
5 one femoral nerve block versus parenteral opioids alone for analgesia in emergency  
6 department patients with hip fractures: a randomized controlled trial. *Acad Emerg Med*  
7 2013; 20: 584-91.  
8  
9  
10  
11 59 Desmet M, Vermeylen K, Van Herreweghe I, *et al.* A longitudinal Supra-Inguinal fascia  
12 Iliaca compartment block reduces morphine consumption after total hip arthroplasty.  
13 *Reg Anesth Pain Med* 2017;42: 327-33.  
14  
15  
16  
17 60 Gasanova I, Alexander JC, Estrera K, *et al.* Ultrasound-Guided suprainguinal fascia  
18 iliaca compartment block versus periarticular infiltration for pain management after total  
19 hip arthroplasty: a randomized controlled trial. *Reg Anesth Pain Med* 2019;44:206-11.  
20  
21  
22  
23 61 Kuchálik J, Magnuson A, Lundin A, *et al.* Local infiltration analgesia or femoral nerve  
24 block for postoperative pain management in patients undergoing total hip arthroplasty.  
25 A randomized, double-blind study. *Scand J Pain* 2017; 16:223-30.  
26  
27  
28  
29 62 Gasanova I, Alexander JC, Estrera K, *et al.* Ultrasound-Guided suprainguinal fascia  
30 iliaca compartment block versus periarticular infiltration for pain management after total  
31 hip arthroplasty: a randomized controlled trial. *Reg Anesth Pain Med* 2019;44: 206-  
32 11.  
33  
34  
35  
36  
37 63 Behrends M, Yap EN, Zhang AL, *et al.* Preoperative fascia Iliaca block does not  
38 improve analgesia after arthroscopic hip surgery, but causes quadriceps muscles  
39 weakness: a randomized, double-blind trial. *Anesthesiology* 2018;129: 536-43.  
40  
41  
42  
43 64 Johnson RL, Kopp SL, Hebl JR, *et al.* Falls and major orthopaedic surgery with  
44 peripheral nerve blockade: a systematic review and meta-analysis. *Br J Anaesth* 2013;  
45 110:518-28.  
46  
47  
48  
49 65 Gadsden JC, Lindenmuth DM, Hadzic A, *et al.* Lumbar plexus block using high-  
50 pressure injection leads to contralateral and epidural spread. *Anesthesiology* 2008;  
51 109:683-88.  
52  
53  
54  
55 66 Brixel SM, Biboulet P, Swisser F, *et al.* Posterior quadratus lumborum block in total  
56 hip arthroplasty: a randomized controlled trial. *Anesthesiology* 2021;134: 722-33.  
57  
58  
59  
60

- 1  
2  
3  
4 67 Kukreja P, MacBeth L, Sturdivant A, *et al.* Anterior quadratus lumborum block  
5 analgesia for total hip arthroplasty: a randomized, controlled study. *Reg Anesth Pain*  
6 *Med* 2019; 44: rapm-2019-100804-9.  
7  
8  
9 68 Jadon A, Kedia SK, Dixit S, *et al.* Comparative evaluation of femoral nerve block and  
10 intravenous fentanyl for positioning during spinal anaesthesia in surgery of femur  
11 fracture. *Indian J Anaesth* 2014; 58:705-8.  
12  
13 69 Birnbaum K, Prescher A, Hessler S, *et al.* The sensory innervation of the hip joint—an  
14 anatomical study. *Surg Radiol Anat* 1997; 19: 371-5.  
15  
16 70 Short AJ, Barnett JJG, Gofeld M, *et al.* Anatomic Study of Innervation of the Anterior  
17 Hip Capsule: Implication for Image-Guided Intervention. *Reg Anesth Pain Med* 2018;  
18 43:186-92.  
19  
20 71 Gerhardt M, Johnson K, Atkinson R, *et al.* Characterisation and classification of the  
21 neural anatomy in the human hip joint. *Hip Int* 2012; 22:75-81.  
22  
23 72 Giron-Arango L, Peng PWH, Chin KJ, *et al.* Pericapsular nerve group (PENG) block  
24 for hip fracture. *Reg Anesth Pain Med* 2018; 43: 859-63.  
25  
26 73 Acharya U, Lamsal R. Pericapsular Nerve Group Block: An Excellent Option for  
27 Analgesia for Positional Pain in Hip Fractures. *Case Rep Anesthesiol* 2020;  
28 2020:1830136.  
29  
30 74 Jadon A, Mohsin K, Sahoo RK, *et al.* Comparison of supra-inguinal fascia iliaca versus  
31 pericapsular nerve block for ease of positioning during spinal anaesthesia: A  
32 randomised double-blinded trial. *Indian J Anaesth* 2021; 65:572-78.  
33  
34 75 Sahoo RK, Jadon A, Sharma SK, *et al.* Peri-capsular nerve group block provides  
35 excellent analgesia in hip fractures and positioning for spinal anaesthesia: A  
36 prospective cohort study. *Indian J Anaesth* 2020; 64:898-900.  
37  
38 76 Mistry T, Sonawane K, Raghuvanshi A, *et al.* Preemptive pericapsular nerve group  
39 block to facilitate sitting position for neuraxial anesthesia in patients with acetabular  
40 fractures: A case series. *Saudi J Anaesth* 2022; 16:221-25.  
41  
42 77 Orozco S, Muñoz D, Jaramillo S, *et al.* Pericapsular Nerve Group (PENG) block for  
43 perioperative pain control in hip arthroscopy. *J Clin Anesth* 2020; 59:3-4.  
44  
45  
46  
47  
48  
49  
50  
51  
52  
53  
54  
55  
56  
57  
58  
59  
60

- 1  
2  
3  
4 78 Morrison C, Brown B, Lin DY, *et al.* Analgesia and anesthesia using the pericapsular  
5 nerve group block in hip surgery and hip fracture: a scoping review. *Reg Anesth Pain*  
6 *Med* 2021; 46:169-75.  
7  
8  
9  
10 79 Kukreja P, Avila A, Northern T, *et al.* A Retrospective Case Series of Pericapsular  
11 Nerve Group (PENG) Block for Primary Versus Revision Total Hip Arthroplasty  
12 Analgesia. *Cureus* 2020;12: e8200.  
13  
14  
15 80 Mysore K, Sancheti SA, Howells SR, *et al.* Postoperative analgesia with pericapsular  
16 nerve group (PENG) block for primary total hip arthroplasty: a retrospective study. *Can*  
17 *J Anaesth* 2020;67: 1673-74.  
18  
19  
20  
21 81 Kinjo S, Zhang AL. Rescue Pericapsular Nerve Group Block for Hip Arthroscopy: A  
22 Report of 3 Cases. *A A Pract* 2022;16: e01553.  
23  
24  
25 82 Fernicola, Jacob Tannehill I, Tucker CJ, *et al.* The Pericapsular Nerve Group Block  
26 for Perioperative Pain Management for Hip Arthroscopy. *Arthrosc Tech* 2021; 10:  
27 e1799-e1803.  
28  
29  
30  
31 83 Rocha-Romero A, Arias-Mejia K, Salas-Ruiz A, *et al.* Pericapsular nerve group (PENG)  
32 block for hip fracture in the emergency department: a case series. *Anaesth Rep*  
33 2021;9: 97-100.  
34  
35  
36  
37 84 Natrajan P, Bhat RR, Remadevi R, *et al.* Comparative Study to Evaluate the Effect of  
38 Ultrasound-Guided Pericapsular Nerve Group Block Versus Fascia Iliaca  
39 Compartment Block on the Postoperative Analgesic Effect in Patients Undergoing  
40 Surgeries for Hip Fracture under Spinal Anesthesia. *Anesth Essays Res* 2021; 15:285-  
41 89.  
42  
43  
44  
45  
46 85 Mosaffa F, Taheri M, Manafi Rasi A, *et al.* Comparison of pericapsular nerve group  
47 (PENG) block with fascia iliaca compartment block (FICB) for pain control in hip  
48 fractures: A double-blind prospective randomized controlled clinical trial. *Orthop*  
49 *Traumatol Surg Res* 2022; 108:103135.  
50  
51  
52  
53  
54 86 Aliste J, Laya S, Bravo D, *et al.* Randomized comparison between pericapsular  
55 nerve group (PENG) block and suprainguinal fascia iliaca block for total hip  
56 arthroplasty. *Reg Anesth Pain Med* 2021; 46:874-78.  
57  
58  
59  
60

- 1  
2  
3  
4 87 Zheng J, Pan D, Zheng B, *et al.* Preoperative pericapsular nerve group (PENG) block  
5 for total hip arthroplasty: a randomized, placebo-controlled trial. *Reg Anesth Pain Med*  
6 2022; 47:155-60.  
7  
8  
9 88 Hua H, Xu Y, Jiang M, *et al.* Evaluation of Pericapsular Nerve Group (PENG) Block  
10 for Analgesic Effect in Elderly Patients with Femoral Neck Fracture Undergoing Hip  
11 Arthroplasty. *J Healthc Eng* 2022; 2022:7452716.  
12  
13  
14 89 Pascarella G, Costa F, Del Buono R, *et al*; collaborators. Impact of the pericapsular  
15 nerve group (PENG) block on postoperative analgesia and functional recovery  
16 following total hip arthroplasty: a randomised, observer-masked, controlled trial.  
17 *Anaesthesia* 2021; 76: 1492-98.  
18  
19  
20 90 Lin DY, Brown B, Morrison C, *et al.* Pericapsular nerve group block results in a longer  
21 analgesic effect and shorter time to discharge than femoral nerve block in patients  
22 after hip fracture surgery: a single-center double-blinded randomized trial. *J Int Med*  
23 *Res* 2022; 50:3000605221085073.  
24  
25  
26 91 Choi YS, Park KK, Lee B, *et al.* Pericapsular Nerve Group (PENG) Block versus  
27 Supra-Inguinal Fascia Iliaca Compartment Block for Total Hip Arthroplasty: A  
28 Randomized Clinical Trial. *J Pers Med* 2022; 12:408.  
29  
30  
31 92 Sahoo RK, Jadon A, Sharma SK, *et al.* Pericapsular nerve group (PENG) block for hip  
32 fractures: Another weapon in the armamentarium of anesthesiologists. *J Anaesthesiol*  
33 *Clin Pharmacol* 2021; 37:295-96.  
34  
35  
36 93 Black ND, Chin KJ. Pericapsular nerve group (PENG) block: Comments and practical  
37 considerations. *J Clin Anesth* 2019; 56:143-44.  
38  
39  
40 94 Del Buono R, Padua E, Pascarella G, *et al.* Pericapsular nerve group block: an  
41 overview. *Minerva Anesthesiol* 2021; 87:458-66.  
42  
43  
44 95 Bilal B, Öksüz G, Boran ÖF, *et al.* High volume pericapsular nerve group (PENG) block  
45 for acetabular fracture surgery: A new horizon for novel block. *J Clin Anesth* 2020;  
46 62:109702.  
47  
48  
49 96 Endersby RVW, Moser JJ, Ho ECY, *et al.* Motor blockade after iliopsoas plane (IPB)  
50 and pericapsular nerve group (PENG) blocks: A little may go a long way. *Acta*  
51 *Anaesthesiol Scand* 2021; 65:135-36.  
52  
53  
54  
55  
56  
57  
58  
59  
60

- 1  
2  
3  
4 97 Yu HC, Moser JJ, Chu AY, *et al.* Inadvertent quadriceps weakness following the  
5 pericapsular nerve group (PENG) block. *Reg Anesth Pain Med* 2019; 44: 611-13.  
6  
7  
8 98 Ciftci B, Ahiskalioglu A, Altintas HM, *et al.* A possible mechanism of motor blockade  
9 of high volume pericapsular nerve group (PENG) block: A cadaveric study. *J Clin*  
10 *Anesth* 2021; 74:110407.  
11  
12  
13 99 Mistry T, Sonawane KB. Gray zone of pericapsular nerve group (PENG) block. *J Clin*  
14 *Anesth* 2019; 58:123-24.  
15  
16  
17 100 Allard C, Pardo E, de la Jonquière C, *et al.* Comparison between femoral block and  
18 PENG block in femoral neck fractures: A cohort study. *PLoS One* 2021;16: e0252716.  
19  
20  
21 101 Valoriani J, Conti D, Giancesello L, *et al.* Combined pericapsular nerve group and  
22 lateral femoral cutaneous nerve blocks for hip fracture in a polytraumatized patient-A  
23 case report. *Saudi J Anaesth* 2022; 16:211-13.  
24  
25  
26  
27 102 Gong WY, Li N, Chen YY, *et al.* Combination of Pericapsular Nerve Group (PENG)  
28 and Sacral Plexus Blocks for Minimally Invasive Percutaneous Internal Fixation in  
29 Outpatient with Femoral Neck Pathologic Fracture. *Pain Med* 2022; 23:427-428.  
30  
31  
32  
33 103 Luo W, Liang J, Wu J, *et al.* Effects of pericapsular nerve group (PENG) block on  
34 postoperative recovery in elderly patients with hip fracture: study protocol for a  
35 randomised, parallel controlled, double-blind trial. *BMJ Open* 2022; 12: e051321.  
36  
37  
38  
39 104 Shamseer L, Moher D, Clarke M. Preferred reporting items for systematic review and  
40 meta-analysis protocols (PRISMA-P) 2015: elaboration and explanation. *BMJ* 2015;  
41 350: g7647.  
42  
43  
44  
45 105 Higgins JPT, Thomas J, Chandler J, *et al.* Cochrane Handbook for Systematic  
46 Reviews of Interventions version 6.2 (updated February 2021). Cochrane, 2021.  
47 Available: [www.training.cochrane.org/handbook](http://www.training.cochrane.org/handbook).  
48  
49  
50  
51 106 Page MJ, McKenzie JE, Bossuyt PM, *et al.* The PRISMA 2020 statement: an updated  
52 guideline for reporting systematic reviews. *BMJ* 2021; 372: n71.  
53  
54  
55  
56 107 Bravo D, Layera S, Aliste J, *et al.* Lumbar plexus block versus suprainguinal fascia  
57 iliaca block for total hip arthroplasty: a single-blinded, randomized trial. *J Clin Anesth*  
58 2020; 66:109907.  
59  
60



- 1  
2  
3  
4 108 Arnuntasapakul V, Chalachewa T, Leurcharusmee P, *et al.* Ultrasound with  
5 neurostimulation compared with ultrasound guidance alone for lumbar plexus block:  
6 A randomised single blinded equivalence trial. *Eur J Anaesthesiol* 2018; 35: 224-30.  
7  
8  
9 109 McGillivray MK, Haldane C, Doherty C, *et al.* Evaluation of muscle strength following  
10 peripheral nerve surgery: A scoping review. *PMR* 2022; 14 :383-94.  
11  
12  
13 110 Medical Research Council. Aids to the examination of the peripheral nervous system.  
14 Londres; 1976. (Memorandum). Behrends M, Yap EN, Zhang AL, Kolodzie K, Kinjo S,  
15 Harbell MW, Aleshi P. Preoperative Fascia Iliaca Block Does Not Improve Analgesia  
16 after Arthroscopic Hip Surgery, but Causes Quadriceps Muscles Weakness: A  
17 Randomized, Double-blind Trial. *Anesthesiology* 2018; 129:536-43.  
18  
19  
20 111 Maffiuletti NA. Assessment of hip and knee muscle function in orthopaedic practice  
21 and research. *J Bone Joint Surg Am* 2010; 92:220-29.  
22  
23  
24 112 Wessels E, Perrie H, Scribante J, *et al.* Quality of recovery in the perioperative setting:  
25 A narrative review. *J Clin Anesth* 2022; 78:110685.  
26  
27  
28 113 Soares RW, Ruzbarsky JJ, Arner JW, *et al.* Midterm Outcomes After Hip Labral  
29 Augmentation in Revision Hip Arthroscopy. *Am J Sports Med* 2022; 50:1299-05.  
30  
31  
32 114 Gheibi S, Mahmoodzadeh A, Kashfi K, *et al.* Data Extraction from Graphs Using  
33 Adobe Photoshop: Applications for Meta-Analyses. *Int J Endocrinol Metab* 2019;17:  
34 e95216.  
35  
36  
37 115 Higgins JPT, Altman DG, Gøtzsche PC, *et al.* The Cochrane collaboration's tool for  
38 assessing risk of bias in randomised trials. *BMJ* 2011; 343: d5928.  
39  
40  
41 116 Higgins JPT, Savović J, Page MJ, *et al.* Chapter 8: Assessing risk of bias in a  
42 randomized trial. In: Higgins JPT, Thomas J, Chandler J, Cumpston M, Li T, Page MJ,  
43 Welch VA (editors). *Cochrane Handbook for Systematic Reviews of Interventions*  
44 version 6.2 (updated February 2021). Cochrane, 2021. Available from  
45 [www.training.cochrane.org/handbook](http://www.training.cochrane.org/handbook).  
46  
47  
48 117 Savović J, Turner RM, Mawdsley D, *et al.* Association between Risk of-Bias  
49 assessments and results of randomized trials in Cochrane reviews: the ROBES Meta-  
50 Epidemiologic study. *Am J Epidemiol* 2018;187: 1113-22.  
51  
52  
53 118 Wetterslev J, Thorlund K, Brok J, *et al.* Estimating required information size by  
54  
55  
56  
57  
58  
59  
60

- 1  
2  
3  
4 quantifying diversity in random-effects model meta-analyses. *BMC Med Res Methodol*  
5 2009; 9:86.  
6  
7  
8 119 Wetterslev J, Jakobsen JC, Gluud C. Trial sequential analysis in systematic reviews  
9 with meta-analysis. *BMC Med Res Methodol* 2017; 17:39.  
10  
11 120 Wetterslev J, Thorlund K, Brok J, *et al*. Trial sequential analysis may establish when  
12 firm evidence is reached in cumulative meta-analysis. *J Clin Epidemiol* 2008; 61: 64-  
13 75.  
14  
15  
16  
17 121 Thorlund K, Engstrøm J, Wetterslev J, *et al*. User manual for trial sequential analysis  
18 (TSA) Copenhagen trial unit, centre for clinical intervention research, Denmark;  
19 2011. Available: <http://www.ctu.dk/tsa> [Accessed 2021].  
20  
21  
22  
23 122 Imberger G, Thorlund K, Gluud C, *et al*. False-Positive findings in Cochrane meta-  
24 analyses with and without application of trial sequential analysis: an empirical review.  
25 *BMJ Open* 2016;6: e011890.  
26  
27  
28  
29 123 Brok J, Thorlund K, Gluud C, *et al*. Trial sequential analysis reveals insufficient  
30 information size and potentially false positive results in many meta-analyses. *J Clin*  
31 *Epidemiol* 2008; 61:763-9.  
32  
33  
34  
35 124 Norman GR, Sloan JA, Wyrwich KW. Interpretation of changes in health-related  
36 quality of life: the remarkable universality of half a standard deviation. *Med Care* 2003;  
37 41:582-92.  
38  
39  
40  
41 125 Castellini G, Nielsen EE, Gluud C. Comment on: "Cell therapy for heart disease: Trial  
42 sequential analyses of two cochrane reviews". *Clin Pharmacol Ther* 2017; 102:21-4.  
43  
44  
45 126 Egger M, Davey Smith G, Schneider M, *et al*. Bias in meta-analysis detected by a  
46 simple, graphical test. *BMJ* 1997;315: 629-34.  
47  
48  
49 127 Sterne JA, Gavaghan D, Egger M. Publication and related bias in meta-analysis:  
50 power of statistical tests and prevalence in the literature. *J Clin Epidemiol* 2000;  
51 53:1119-29.  
52  
53  
54 128 Mavridis D, Salanti G. How to assess publication bias: funnel plot, trim-and-fill method  
55 and selection models. *Evid Based Ment Health* 2014; 17:30.  
56  
57  
58 129 Guyatt G, Oxman AD, Akl EA, *et al*. Grade guidelines: 1. Introduction-GRADE  
59 evidence profiles and summary of findings tables. *J Clin Epidemiol* 2011; 64:383-94.  
60

1  
2  
3  
4  
5  
6  
7  
8  
9  
10  
11  
12  
13  
14  
15  
16  
17  
18  
19  
20  
21  
22  
23  
24  
25  
26  
27  
28  
29  
30  
31  
32  
33  
34  
35  
36  
37  
38  
39  
40  
41  
42  
43  
44  
45  
46  
47  
48  
49  
50  
51  
52  
53  
54  
55  
56  
57  
58  
59  
60

### Figure Legends

Figure 1. The PRISMA flow diagram. PRISMA, Preferred Reporting Items for Systematic Reviews and Meta-analysis.

For peer review only



The PRISMA flow diagram

## Supplementary Appendix file 1: Search strategy

### Search strategy of PubMed as follows:

#1 “Hip” [MeSH Terms] OR Hips [tiab] OR Coxa [tiab] OR Coxas [tiab]

#2 “arthroscopy” [Mesh] or Arthroscopies[af] or Arthroscopic Surgical Procedures [af] or Arthroscopic Surgical Procedure[af] or Procedure, Arthroscopic Surgical[af] or Procedures, Arthroscopic Surgical[af] or Surgical Procedure, Arthroscopic[af] or Surgery, Arthroscopic [af] or Surgical Procedures, Arthroscopic[af] or Arthroscopic Surgery [af] or Arthroscopic Surgeries[af] or Surgeries, Arthroscopic[af]

#3 #1 AND #2

#4 “Hip Fracture” [Mesh] OR “Femoral Neck Fractures” [Mesh] OR Femoral Neck Fracture [tiab] OR Femur Neck Fractures[tiab] OR Femur Neck Fracture [tiab] OR Fractures, Hip [af] OR Trochanteric Fractures [af] OR Fractures, Trochanteric [af] OR Intertrochanteric Fractures [af] OR Fractures, Intertrochanteric [af] OR Subtrochanteric Fractures [af] OR Fractures, Subtrochanteric [af] OR Femoral Fracture[af] OR Fracture, Femoral [af] OR Fractures, Femoral [af] (hip\* or intertrochanteric or subtrochanteric or trochanteric or pertrochanteric or peritrochanteric or femur or femoral or acetabul\*) AND fracture\*

#5 “Osteoarthritis, Hip” [Mesh] OR Hip Osteoarthritis[af] OR Osteoarthritis Of Hip [af] OR Osteoarthritis Of Hips[af] OR Coxarthrosis [af] OR Coxarthroses [af] OR Osteoarthritis of the Hip[af]

#6 Hip Injuries [Mesh] OR Hip Dislocation [Mesh] OR Injuries, Hip [af] OR Dislocation, Hip [af] OR Dislocations, Hip[af] OR Hip Dislocations[af] OR Hip Displacement[af] OR Displacement, Hip[af] OR Displacements, Hip[af] OR Hip Displacements[af] OR Hip Dysplasia[af] OR Dysplasia, Hip[af] OR Dysplasias, Hip[af] OR Hip Dysplasias [af]

#7 “Hip Prosthesis” [Mesh] OR “Arthroplasty, Replacement, Hip” [Mesh] OR Hip Prostheses [af] OR Prostheses, Hip[af] OR Prosthesis, Hip[af] OR Femoral Head Prosthesis[af] OR Femoral Head Prostheses[af] OR Prostheses, Femoral Head [af] OR Prosthesis, Femoral Head [af] OR Arthroplasties, Replacement, Hip [af] OR Arthroplasty, Hip Replacement [af] OR Hip Prosthesis Implantation [af] OR Hip Prosthesis Implantations [af] OR Implantation, Hip Prosthesis [af] OR Prosthesis Implantation, Hip [af] OR Hip Replacement Arthroplasty [af] OR Replacement Arthroplasties, Hip [af] OR Replacement Arthroplasty, Hip [af] OR Arthroplasties, Hip

1  
2  
3  
4 Replacement [af] OR Hip Replacement Arthroplasties [af] OR Hip Replacement, Total [af] OR Total  
5 Hip Replacement [af] OR Total Hip Arthroplasty [af] OR Arthroplasty, Total Hip [af] OR Hip  
6 Arthroplasty, Total [af] OR Total Hip Arthroplasties [af] OR Replacement, Total Hip [af] OR Total  
7 Hip Replacements [af]

8  
9  
10 #8 #3 OR #4 OR #5 OR #6 OR #7

11  
12 #9 “Aged” [Mesh] or "Aged, 80 and over"[Mesh] or "Aged, 65 and over"[Mesh] or Centenarians  
13 [Mesh] or Nonagenarians [Mesh] or Octogenarians [Mesh] or Geriatrics [Mesh] or Elderly [af] or  
14 Centenarian [af] or Nonagenarian [af] or Oldest Old [af] or Octogenarian [af] or aging [af] or aged  
15 [af] or elderly[af] or senior [af] or old [af] or old-age[af].

16  
17 #10 “pericapsular nerve group block” [af] OR PENG [af]

18  
19 #11 #8 AND #9 AND #10

20  
21 #12 “controlled clinical trial” [Publication Type] OR “randomized controlled trial” [Publication  
22 Type] OR “randomized” [Title/Abstract] OR “randomized” [Title/Abstract] OR “Placebo”  
23 [Title/Abstract] OR “randomly” [Title/Abstract] OR “Clinical trial” [Title]

24  
25 #13 (animals [MeSH Terms]) NOT ((human [MeSH Terms]) AND (animals [MeSH Terms]))

26  
27 #14 #11 and #12 not #13

28  
29 **Search strategy of Cochrane library as follows:**

30  
31 #1 MeSH descriptor: [Hip] explode all trees.

32  
33 #2 (Hips OR Coxa OR Coxas): ti,ab,kw

34  
35 #3 #1 or # 2

36  
37 #4 MeSH descriptor: [arthroscopy] explode all trees

38  
39 #5 (arthroscop\*): ti,ab,kw

40  
41 #6 #4 or # 5

42  
43 #7 #3 and # 6

44  
45 #8 MeSH descriptor: [Hip Fracture] explode all trees

46  
47 #9 (hip surgery OR hip prothes\* OR hip replacement\* OR hip arthroplast\* OR femoral head  
48 prothes\* OR joint prothes\*): ti,ab,kw

49  
50 #10 ((hip\* or fem?r\* or intertrochant\* or trochant\* or pertrochant\* or intertrochant\* or  
51 peritrochant\* or subtrochant\* or intracapsular\* or extracapsular\* or acetabul\*) and fracture\*)

52  
53 #11 MeSH descriptor: [Osteoarthritis, Hip] explode all trees

#12 (Hip Osteoarthritis OR Osteoarthritis Of Hip OR Osteoarthritis Of Hips OR Coxarthrosis OR Coxarthroses OR Osteoarthritis of the Hip): ti,ab,kw

#13 MeSH descriptor: [Hip Injuries] explode all trees

#14 ((disloca\* or displace\* or dysplas\*) and hip\*)

#15 #7 or #8 or #9 or #10 or #11 or #12 or #13 or #14

#16 MeSH descriptor: [Aged] explode all trees

#17 MeSH descriptor: [Aged, 80 and over] explode all trees

#18 MeSH descriptor: [Aged, 65 and over] explode all trees

#19 MeSH descriptor: [Geriatrics] explode all trees

#20 MeSH descriptor: [Nonagenarians] explode all trees

#21 MeSH descriptor: [Octogenarians] explode all trees

#22((Geriatric\* or Elder\* or old-age or pensioner\*or aging or aged or elderly or senior or old or Oldest Old or old-age or Nonagenarian\* or Octogenarian\*)

#23 #16 or #17 or #18 or #19 or #20 or #21 or #22

#24 (pericapsular nerve group block or PENG): ti,ab,kw

#25 (controlled clinical trial):pt or (randomized controlled trial):pt or (random\*): ti,ab,kw or (Clinical trial):ti,ab,kw

#26 #15 and #23 and #24 and #25

### **Search strategy of Web of Science as follows:**

#1 TS= (Hip or Hips or Coxa or Coxas)

#2 TS= (arthroscop\*)

#3 #1 and #2

#4 TS= (Hip\* or femu\* or femo\* or intertrochant\* or trochant\* or pertrochant\* or intertrochant\* or peritrochant\* or subtrochant\* or intracapsular\* or extracapsular\* or acetabul\*)

#5 TS= (fracture\*)

#6 #4 and #5

#7 TS= (Hip Osteoarthritis or Osteoarthritis of Hip or Osteoarthritis of Hips or Coxarthrosis or Coxarthroses or Osteoarthritis of the Hip)

#8 TS= (Hip Injuries or Hip disloca\* or Hip displace\* or Hip dysplas\*)

#9 #3 OR #6 OR #7 OR #8

1  
2  
3  
4 #10 TS= (Geriatric\* or Elder\* or old-age or pensioner\* or aging or aged or elderly or senior or old  
5 or Oldest Old or old-age or Nonagenarian\* or Octogenarian\*)

6  
7 #11 TS= (pericapsular nerve group block or PENG)

8  
9 #12 TS= (random\* or Clinical trial)

10  
11 #13 #9 and #10 and #11 and #12

12  
13 **Search strategy for Ovid Medline as follows:**

14  
15 #1 exp Hip/

16  
17 #2 (Hips OR Coxa OR Coxas) .mp.

18  
19 #3 #1 or # 2

20  
21 #4 exp arthroscopy/

22  
23 #5 (arthroscop\*).mp.

24  
25 #6 #4 or # 5

26  
27 #7 #3 and # 6

28  
29 #8 exp Hip Fracture/

30  
31 #9 (hip surgery OR hip prosthes\* OR hip replacement\* OR hip arthroplast\* OR femoral head  
32 prosthes\* OR joint prosthes\*).mp.

33  
34 #10 ((hip\* or fem?r\* or intertrochant\* or trochant\* or pertrochant\* or intertrochant\* or  
35 peritrochant\* or subtrochant\* or intracapsular\* or extracapsular\* or acetabul\*) and fracture\*).mp.

36  
37 #11 exp Osteoarthritis, Hip/

38  
39 #12 (Hip Osteoarthritis or Osteoarthritis of Hip or Osteoarthritis of Hips or Coxarthrosis or  
40 Coxarthroses or Osteoarthritis of the Hip) .mp.

41  
42 #13 exp Hip Injuries/

43  
44 #14 ((disloca\* or displace\* or dysplas\*) and hip\*).mp.

45  
46 #15 #7 or #8 or #9 or #10 or #11 or #12 or #13 or #14

47  
48 #16 exp Aged/

49  
50 #17 exp Aged, 80 and over/

51  
52 #18 exp Aged, 65 and over/

53  
54 #19 exp Geriatrics/

55  
56 #20 exp Nonagenarians/

57  
58 #21 exp Octogenarians/  
59  
60



1  
2  
3  
4 #22((Geriatric\* or Elder\* or old-age or pensioner\*or aging or aged or elderly or senior or old or  
5 Oldest Old or old-age or Nonagenarian\* or Octogenarian\*).mp.

6  
7 #23 #16 or #17 or #18 or #19 or #20 or #21 or #22

8  
9 #24 (pericapsular nerve group block or PENG) .mp.

10  
11 #25 #15 and #23 and #24

12  
13 #26 randomized controlled trial.pt.

14  
15 #27controlled clinical trial.pt.

16  
17 #28 randomized.ab.

18  
19 #29 placebo.ab.

20  
21 #30 clinical trials as topic.sh.

22  
23 #31 randomly.ab.

24  
25 #32 trial.ti.

26  
27 #33 #26 or #27 or #28 or #29 or #30 or #31 or #32

28  
29 #34 (animals not (humans and animals)).sh.

30  
31 #35 #25 and #33 not #34

32  
33 **Search strategy for Embase as follows:**

34  
35 #1 exp Hip/

36  
37 #2 (Hips OR Coxa OR Coxas) .mp.

38  
39 #3 #1 or # 2

40  
41 #4 exp arthroscopy/

42  
43 #5 (arthroscop\*).mp.

44  
45 #6 #4 or # 5

46  
47 #7 #3 and # 6

48  
49 #8 exp Hip Fracture/

50  
51 #9 (hip surgery OR hip prosthes\* OR hip replacement\* OR hip arthroplast\* OR femoral head  
52 prosthes\* OR joint prosthes\*).mp.

53  
54 #10 ((hip\* or fem?r\* or intertrochant\* or trochant\* or pertrochant\* or intertrochant\* or  
55 peritrochant\* or subtrochant\* or intracapsular\* or extracapsular\* or acetabul\*) and fracture\*).mp.

56  
57 #11 exp Osteoarthritis, Hip/

58  
59 #12 (Hip Osteoarthritis or Osteoarthritis of Hip or Osteoarthritis of Hips or Coxarthrosis or  
60

Coxarthroses or Osteoarthritis of the Hip) .mp.

#13 exp Hip Injuries/

#14 ((disloca\* or displace\* or dysplas\*) and hip\*).mp.

#15 #7 or #8 or #9 or #10 or #11 or #12 or #13 or #14

#16 exp Aged/

#17 exp Aged, 80 and over/

#18 exp Aged, 65 and over/

#19 exp Geriatrics/

#20 exp Nonagenarians/

#21 exp Octogenarians/

#22((Geriatric\* or Elder\* or old-age or pensioner\*or aging or aged or elderly or senior or old or Oldest Old or old-age or Nonagenarian\* or Octogenarian\*).mp.

#23 #16 or #17 or #18 or #19 or #20 or #21 or #22

#24 (pericapsular nerve group block or PENG) .mp.

#25 #15 and #23 and #24

#26 exp randomized controlled trial/

#27(random\*).mp.

#28 (placebo\*).mp.

#29 Clinical trial.mp.

#30 clinical trials as topic.sh.

#31 #26 or #27 or #28 or #29 or #30

#32 (exp animal/ or nonhuman/ or exp animal experiment/) not human/

#33 #25 and #31 not #32

### **WHO ICTRP Trial registry**

<http://apps.who.int/trialsearch> (WHO ICTRP register) will be searched via the advanced search page.

Search terms were: (Hips OR Coxa OR Coxas or fem?r\* or intertrochant\* or trochant\* or pertrochant\* or intertrochant\* or peritrochant\* or subtrochant\* or intracapsular\* or extracapsular\* or acetabul\*) AND (Geriatric\* or Elder\* or old-age or pensioner\*or aging or aged or elderly or senior or old or Oldest Old or old-age or Nonagenarian\* or Octogenarian\*) AND (pericapsular nerve group block or PENG).

## Clinicaltrials.gov search strategy

<http://clinicaltrials.gov> (NIH register) will be searched via advanced search page. Search terms were:

Condition or disease: (Hips OR Coxa OR Coxas or fem?r\* or intertrochant\* or trochant\* or pertrochant\* or intertrochant\* or peritrochant\* or subtrochant\* or intracapsular\* or extracapsular\* or acetabul\*) AND (Geriatric\* or Elder\* or old-age or pensioner\* or aging or aged or elderly or senior or old or Oldest Old or old-age or Nonagenarian\* or Octogenarian\*).

Study type: Interventional Studies.

Intervention/treatment: (pericapsular nerve group block or PENG)

## Chinese database

### China National Knowledge Infrastructure (CNKI) search strategy

(髌[全部字段]or 关节[全部字段] or 股骨头[全部字段]or 关节唇[全部字段] or 股骨颈 [全部字段] or 转子 [全部字段] or 骨盆 [全部字段] or 关节炎[全部字段] or 骨折[全部字段]or 损伤 [全部字段] or 脱位[全部字段] or 撞击[全部字段] or 关节镜[全部字段] or 微创[全部字段] or 保守[全部字段]or 置换[全部字段] or 成形[全部字段] or 假体[全部字段] or 固定[全部字段] or 外伤[全部字段]) and (关节囊周[全部字段] or PENG[全部字段] or 阻滞 [全部字段]) and (老年[全部字段] or 高龄[全部字段] or 老龄 or 80 岁以上[全部字段]) and (随机[全部字段] or 对照[全部字段])

### Chinese BioMedical Literature (CBM)

(髌[全部字段] or 关节[全部字段] or 股骨头[全部字段]or 关节唇[全部字段] or 股骨颈 [全部字段] or 转子 [全部字段] or 骨盆 [全部字段] or 关节炎[全部字段] or 骨折[全部字段]or 损伤 [全部字段] or 脱位[全部字段] or 撞击[全部字段] or 关节镜[全部字段] or 微创[全部字段] or 保守[全部字段]or 置换[全部字段] or 成形[全部字段] or 假体[全部字段] or 固定[全部字段] or 外伤[全部字段]) and (关节囊周[全部字段] or PENG[全部字段] or 阻滞 [全部字段]) and (老年[全部字段] or 高龄[全部字段] or 老龄 or 80 岁以上[全部字段]) and (随机[全部字段] or 对照[全部字段])

## VIP database

关键词=(髌 or 关节 or 股骨头 or 关节唇 or 股骨颈 or 转子 or 骨盆 or 关节炎 or 骨折 or 损伤 or 脱位 or 撞击 or 关节镜 or 微创 or 保守 or 置换 or 成形 or 假体 or 固定 or 外伤) AND 关键词=(老年 or 高龄 or 老龄 or 80 岁以上) AND 关键词=(关节囊周 or PENG or 阻滞) AND

1  
2  
3  
4 关键词=(随机 or 对照)  
5

6 **Wan fang database.**  
7

8 (髌[全部字段]or 关节[全部字段]股骨头[全部字段]or 关节唇[全部字段]or 股骨颈 [全部字段]  
9 or 转子 [全部字段] or 骨盆 [全部字段] or 关节炎[全部字段] or 骨折[全部字段]or 损伤[全  
10 部字段] or 脱位[全部字段] or 撞击[全部字段] or 关节镜[全部字段] or 微创[全部字段] or 保  
11 守[全部字段]or 置换[全部字段] or 成形[全部字段] or 假体[全部字段] or 固定[全部字段] or  
12 外伤[全部字段]) and (关节囊周[全部字段] or PENG[全部字段] or 阻滞 [全部字段]) and (老  
13 年[全部字段] or 高龄[全部字段] or 老龄 or 80 岁以上[全部字段]) and (随机[全部字段] or 对  
14 照[全部字段])  
15  
16  
17  
18  
19  
20  
21  
22  
23  
24  
25  
26  
27  
28  
29  
30  
31  
32  
33  
34  
35  
36  
37  
38  
39  
40  
41  
42  
43  
44  
45  
46  
47  
48  
49  
50  
51  
52  
53  
54  
55  
56  
57  
58  
59  
60

## Supplementary Appendix file 2 : Assessment of risk of bias

### Random sequence generation

- **Low risk:** If sequence generation was achieved using computer random number generator or a random number table. Drawing lots, tossing a coin, shuffling cards, and throwing dice were also considered adequate if performed by an independent adjudicator.
- **Unclear risk:** If the method of randomisation was not specified, but the trial was still presented as being randomised.
- **High risk:** If the allocation sequence is not randomised or only quasi-randomised. These trials will be excluded.

### Allocation concealment

- **Low risk:** If the allocation of patients was performed by a central independent unit, onsite locked computer or identical-looking numbered sealed envelopes.
- **Uncertain risk:** If the trial was classified as randomised but the allocation concealment process was not described.
- **High risk:** If the allocation sequence was familiar to the investigators who assigned participants.

### Blinding of participants and treatment providers

- **Low risk:** If the participants and the treatment providers were blinded to intervention allocation and this was described.
- **Uncertain risk:** If the procedure of blinding was insufficiently described.
- **High risk:** If blinding of participants and the treatment providers was not performed.

### Blinding of outcome assessment

- **Low risk of bias:** If it was mentioned that outcome assessors were blinded and this was described.
- **Uncertain risk of bias:** If it was not mentioned if the outcome assessors in the trial were blinded or the extent of blinding was insufficiently described.
- **High risk of bias:** If no blinding or incomplete blinding of outcome assessors was performed.

### Incomplete outcome data

- **Low risk of bias:** If missing data were unlikely to make treatment effects depart from plausible

1  
2  
3  
4 values. This could be either (1) there were no drop-outs or withdrawals for all outcomes, or (2)  
5  
6 the numbers and reasons for the withdrawals and drop-outs for all outcomes were clearly stated  
7  
8 and could be described as being similar to both groups. Generally, the trial is judged as at a low  
9  
10 risk of bias due to incomplete outcome data if drop-outs are less than 5%. However, the 5%  
11  
12 cut-off is not definitive.

- 13  
14 ➤ **Uncertain risk of bias:** If there was insufficient information to assess whether missing data  
15  
16 were likely to induce bias on the results.
- 17  
18 ➤ **High risk of bias:** If the results were likely to be biased due to missing data either because the  
19  
20 pattern of drop-outs could be described as being different in the two intervention groups or the  
21  
22 trial used improper methods in dealing with the missing data (e.g. last observation carried  
23  
24 forward).

### 25 **Selective outcome reporting**

- 26  
27 ➤ **Low risk of bias:** If a protocol was published before or at the time the trial was begun and the  
28  
29 outcomes specified in the protocol were reported on. If there is no protocol or the protocol was  
30  
31 published after the trial has begun, reporting of serious adverse events will grant the trial a  
32  
33 grade of low risk of bias.
- 34  
35 ➤ **Uncertain risk of bias:** If no protocol was published and the outcome of serious adverse events  
36  
37 were not reported on.
- 38  
39 ➤ **High risk of bias:** If the outcomes in the protocol were not reported on.

### 40 **Other risks of bias**

- 41  
42 ➤ **Low risk of bias:** If the trial appears to be free of other components that could put it at risk of  
43  
44 bias.
- 45  
46 ➤ **Unclear risk of bias:** If the trial may or may not be free of other components that could put it  
47  
48 at risk of bias.
- 49  
50 ➤ **High risk of bias:** If there are other factors in the trial that could put it at risk of bias (including,  
51  
52 Design-specific risk of bias, stopped early due to some data-dependent process including a  
53  
54 formal-stopping rule, baseline imbalance, claimed fraudulent, blocked randomization in  
55  
56 unblinded trials, differential diagnostic activity, contamination, inappropriate measurement  
57  
58 instrument for outcomes, deviation from the study protocol unrelated to the clinical practice,  
59  
60 authors conducted trials on the same topic, academic bias, for-profit bias, inappropriate

financial conflict of interest).

### Overall risk of bias

- **Low risk of bias:** The trial will be classified as overall ‘low risk of bias’ only if all of the bias domains described in the above paragraphs are classified as ‘low risk of bias’.
- **High risk of bias:** The trial will be classified as ‘high risk of bias’ if any of the bias risk domains described in the above are classified as ‘unclear’ or ‘high risk of bias’.
- We will assess the domains ‘blinding of outcome assessment’, ‘incomplete outcome data’, and ‘selective out- come reporting’ for each outcome result. Thus, we can assess the bias risk for each outcome assessed in addition to each trial. Our primary conclusions will be based on the results of our primary outcome results with overall low risk of bias. Both our primary and secondary conclusions will be presented in the summary of findings tables.

### Criteria classification

- If all risk of bias domains were scored as having a low risk of bias, the trial was defined as having a low overall risk of bias.
- If one or more of the bias domains were scored as unclear or high risk of bias, the trial was defined as having a high overall risk of bias.
- Trials with a low risk of bias in all domains (including sequence generation, allocation concealment, blinding, incomplete data, selective outcome reporting, and other risks of bias) will be classified as having a low overall risk of bias.
- Trials with one or more of these domains scored as unclear or high risk of bias will be defined as having a high overall risk of bias.

## PRISMA-P checklist

**Table** PRISMA-P (preferred reporting items for systematic review and meta-analysis protocols) 2015 checklist: recommended items to address in a systematic review protocol

| Section and topic                 | Item No | Checklist item                                                                                                                                                                                                                | Reported on page # |
|-----------------------------------|---------|-------------------------------------------------------------------------------------------------------------------------------------------------------------------------------------------------------------------------------|--------------------|
| <b>Administrative information</b> |         |                                                                                                                                                                                                                               |                    |
| Title:                            |         |                                                                                                                                                                                                                               |                    |
| Identification                    | 1a      | Identify the report as a protocol of a systematic review                                                                                                                                                                      | 1                  |
| Update                            | 1b      | If the protocol is for an update of a previous systematic review, identify as such                                                                                                                                            | None               |
| Registration                      | 2       | If registered, provide the name of the registry (such as PROSPERO) and registration number                                                                                                                                    | 3,8                |
| Authors:                          |         |                                                                                                                                                                                                                               |                    |
| Contact                           | 3a      | Provide name, institutional affiliation, e-mail address of all protocol authors; provide physical mailing address of corresponding author                                                                                     | 1                  |
| Contributions                     | 3b      | Describe contributions of protocol authors and identify the guarantor of the review                                                                                                                                           | 24                 |
| Amendments                        | 4       | If the protocol represents an amendment of a previously completed or published protocol, identify as such and list changes; otherwise, state plan for documenting important protocol amendments                               | None               |
| Support:                          |         |                                                                                                                                                                                                                               |                    |
| Sponsor                           | 5b      | Provide name for the review funder and/or sponsor                                                                                                                                                                             | None               |
| Role of sponsor or funder         | 5c      | Describe roles of funder(s), sponsor(s), and/or institution(s), if any, in developing the protocol                                                                                                                            | None               |
| <b>Introduction</b>               |         |                                                                                                                                                                                                                               |                    |
| Rationale                         | 6       | Describe the rationale for the review in the context of what is already known                                                                                                                                                 | 4-7                |
| Objectives                        | 7       | Provide an explicit statement of the question(s) the review will address with reference to participants, interventions, comparators, and outcomes (PICO)                                                                      | 7-13               |
| <b>Methods</b>                    |         |                                                                                                                                                                                                                               |                    |
| Eligibility criteria              | 8       | Specify the study characteristics (such as PICO, study design, setting, time frame) and report characteristics (such as years considered, language, publication status) to be used as criteria for eligibility for the review | 8-13 ; 14-15       |



1  
2  
3  
4

|                                              |                                    |     |                                                                                                                                                                                                                                                  |           |
|----------------------------------------------|------------------------------------|-----|--------------------------------------------------------------------------------------------------------------------------------------------------------------------------------------------------------------------------------------------------|-----------|
| 5<br>6<br>7                                  | Information sources                | 9   | Describe all intended information sources (such as electronic databases, contact with study authors, trial registers or other grey literature sources) with planned dates of coverage                                                            | 13-16     |
| 8                                            | Search strategy                    | 10  | Present draft of search strategy to be used for at least one electronic database, including planned limits, such that it could be repeated                                                                                                       | 13-14, S1 |
| 9                                            | Study records:                     |     |                                                                                                                                                                                                                                                  |           |
| 10<br>11                                     | Data management                    | 11a | Describe the mechanism(s) that will be used to manage records and data throughout the review                                                                                                                                                     | 14-16     |
| 12<br>13                                     | Selection process                  | 11b | State the process that will be used for selecting studies (such as two independent reviewers) through each phase of the review (that is, screening, eligibility and inclusion in meta-analysis)                                                  | 14-15     |
| 14<br>15<br>16                               | Data collection process            | 11c | Describe planned method of extracting data from reports (such as piloting forms, done independently, in duplicate), any processes for obtaining and confirming data from investigators                                                           | 14-16     |
| 17<br>18                                     | Data items                         | 12  | List and define all variables for which data will be sought (such as PICO items, funding sources), any pre-planned data assumptions and simplifications                                                                                          | 16        |
| 19<br>20                                     | Outcomes and prioritization        | 13  | List and define all outcomes for which data will be sought, including prioritization of main and additional outcomes, with rationale                                                                                                             | 10-13     |
| 21<br>22<br>23                               | Risk of bias in individual studies | 14  | Describe anticipated methods for assessing risk of bias of individual studies, including whether this will be done at the outcome or study level, or both; state how this information will be used in data synthesis                             | 16-20     |
| 24<br>25<br>26<br>27<br>28<br>29<br>30<br>31 | Data synthesis                     | 15a | Describe criteria under which study data will be quantitatively synthesised                                                                                                                                                                      | 17        |
|                                              |                                    | 15b | If data are appropriate for quantitative synthesis, describe planned summary measures, methods of handling data and methods of combining data from studies, including any planned exploration of consistency (such as $I^2$ , Kendall's $\tau$ ) | 17        |
|                                              |                                    | 15c | Describe any proposed additional analyses (such as sensitivity or subgroup analyses, meta-regression)                                                                                                                                            | 18-21     |
|                                              |                                    | 15d | If quantitative synthesis is not appropriate, describe the type of summary planned                                                                                                                                                               | 17        |
| 32<br>33                                     | Meta-bias(es)                      | 16  | Specify any planned assessment of meta-bias(es) (such as publication bias across studies, selective reporting within studies)                                                                                                                    | 20        |
| 34<br>35<br>36                               | Confidence in cumulative evidence  | 17  | Describe how the strength of the body of evidence will be assessed (such as GRADE)                                                                                                                                                               | 18-20     |

37  
38  
39  
40  
41  
42  
43  
44  
45  
46

# BMJ Open

## Efficacy of pericapsular nerve group (PENG) block on perioperative pain management in elderly patients undergoing hip surgical procedures: a protocol for a systematic review with meta-analysis and trial sequential analysis

|                                 |                                                                                                                                                                                                                                                                                                                                                                                                                                                                                                                                   |
|---------------------------------|-----------------------------------------------------------------------------------------------------------------------------------------------------------------------------------------------------------------------------------------------------------------------------------------------------------------------------------------------------------------------------------------------------------------------------------------------------------------------------------------------------------------------------------|
| Journal:                        | <i>BMJ Open</i>                                                                                                                                                                                                                                                                                                                                                                                                                                                                                                                   |
| Manuscript ID                   | bmjopen-2022-065304.R2                                                                                                                                                                                                                                                                                                                                                                                                                                                                                                            |
| Article Type:                   | Protocol                                                                                                                                                                                                                                                                                                                                                                                                                                                                                                                          |
| Date Submitted by the Author:   | 25-Nov-2022                                                                                                                                                                                                                                                                                                                                                                                                                                                                                                                       |
| Complete List of Authors:       | Zheng, Jianqiao; Sichuan University West China Hospital, Department of Anesthesiology<br>Du, Li; Sichuan Cancer Hospital and Research Institute, Department of Anesthesiology<br>Chen, Guo; Sichuan University West China Hospital, Department of Anesthesiology<br>Zhang, Lu; Sichuan University West China Hospital, Department of Anesthesiology<br>Deng, Xiaoqian; Sichuan University West China Hospital, Department of Anesthesiology<br>Zhang, Weiyi; Sichuan University West China Hospital, Department of Anesthesiology |
| <b>Primary Subject Heading</b>: | Anaesthesia                                                                                                                                                                                                                                                                                                                                                                                                                                                                                                                       |
| Secondary Subject Heading:      | Anaesthesia, Surgery, Global health                                                                                                                                                                                                                                                                                                                                                                                                                                                                                               |
| Keywords:                       | Hip < ORTHOPAEDIC & TRAUMA SURGERY, Anaesthesia in orthopaedics < ANAESTHETICS, Pain management < ANAESTHETICS                                                                                                                                                                                                                                                                                                                                                                                                                    |
|                                 |                                                                                                                                                                                                                                                                                                                                                                                                                                                                                                                                   |

SCHOLARONE™  
Manuscripts

**TITLE PAGE**

Efficacy of pericapsular nerve group (PENG) block on perioperative pain management in elderly patients undergoing hip surgical procedures: a protocol for a systematic review with meta-analysis and trial sequential analysis

**Authors**

Jianqiao Zheng<sup>1</sup> E-mail: zhjq1983@163.com

Li Du<sup>2</sup> E-mail: huaying-duli@163.com

Guo Chen<sup>1</sup> E-mail: Anesthesiology\_SCU@163.com

Lu Zhang<sup>1</sup> E-mail: 304022514@qq.com

Xiaoqian Deng<sup>1</sup> E-mail: 50058837@qq.com

\*Weiyi Zhang<sup>1</sup> E-mail: zhangweiyi@wchscu.cn

<sup>1</sup>Department of Anesthesiology, West China Hospital, Sichuan University No. 37th, Guoxue Alley, Wuhou District, Chengdu 610041, Sichuan, China.

<sup>2</sup>Department of Anesthesiology, Sichuan Cancer Hospital & Institute, Sichuan Cancer Center, School of Medicine, University of Electronic Science and Technology of China, No.55th, People's South Road, Chengdu 610041, Sichuan, China.

\*Corresponding Author

Name: Weiyi Zhang

E-mail: zhangweiyi@wchscu.cn

Phone: +86-28-8542-3593

Address: Department of Anesthesiology, Sichuan University West China Hospital, No. 37th, Guoxue Alley, Wuhou District, Chengdu 610041, Sichuan, China.

Words: 4100

## ABSTRACT

**Introduction** An increasing number of elderly patients suffer from hip diseases associated with moderate to severe perioperative pain during the accelerating global aging process. Optimal analgesia can decrease perioperative complications and facilitate elderly patients' perioperative recovery. Pericapsular nerve group (PENG) block is a relatively new, analgesia adequate, and motor-sparing block technique for perioperative pain management of hip diseases. However, the efficacy of PENG block remains unclear as the limited clinical evidence. Then, we will perform a protocol for a systematic review and meta-analysis to identify the efficacy of PENG block for perioperative pain management.

**Methods and analysis** PubMed, Ovid Medline, Cochrane Library, Embase, Web of Science, China National Knowledge Infrastructure, Chinese BioMedical Literature, Wanfang, and VIP databases will be searched from inception to August 2022 to identify randomized controlled trials of elderly patients accepting PENG block for hip diseases. The primary outcome will be the pain intensity after pain management. Secondary outcomes will be quadriceps strength, perioperative rescue analgesia information and perioperative complications. Assessment of heterogeneity will be primarily inspected by forest plots. If there is no indication of funnel plot asymmetry, a random-effects meta-analysis will be performed. The Cochrane risk-of-bias tool, GRADE (Grading of

1  
2  
3  
4 Recommendations Assessment, Development, and Evaluation) and trial  
5  
6 sequential analysis will be conducted to evaluate the evidence quality and  
7  
8 control the random errors. Funnel plots and Egger's regression test will be  
9  
10 performed to evaluate publication bias.  
11  
12

13  
14 **Ethics and dissemination** Ethical approval was not required for this  
15  
16 systematic review protocol. The results will be disseminated through peer-  
17  
18 reviewed publications.  
19  
20

21  
22 **Keywords** pericapsular nerve group block, hip, elderly, meta-analysis,  
23  
24 randomized controlled trial.  
25  
26

27 **PROSPERO registration number** CRD42022313895  
28  
29

### 30 **Strengths and limitations of the study**

31  
32 ▶ Application of Preferred Reporting Items for Systematic Review and  
33  
34 Meta-Analysis Protocols (PRISMA-P) guidelines for a better quality of  
35  
36 meta-analytical results.  
37  
38

39  
40 ▶ Control of random errors with trial sequential analysis by calculating  
41  
42 the diversity adjusted information size for the outcomes.  
43  
44

45  
46 ▶ Application of Funnel plots and Egger's regression test for publication  
47  
48 bias.  
49

50  
51 ▶ Subgroup analysis based on patients' age, types of hip disease or surgery,  
52  
53 perioperative period, type of anesthesia, and perioperative pain  
54  
55 management techniques for heterogeneity assessment.  
56  
57  
58  
59  
60

## INTRODUCTION

The global population over 60 years old is estimated to increase to 2.1 billion in 2050 (approximately 22% of the global population) and 3.1 billion by 2100.<sup>1</sup> With this accelerating aging process, an increasing number of elderly patients suffer from hip diseases such as hip fractures, and hip osteoarthritis.<sup>2-4</sup> Hip surgery, including hip arthroplasty, hip fracture internal fixation and hip arthroscopy procedures are the main treatments for hip diseases.<sup>5-8</sup> Hip surgery is often associated with moderate to severe postoperative pain, particularly in hip fracture patients undergoing surgical treatment, and severe pain persists throughout the perioperative period.<sup>9-11</sup> As a minimally invasive approach, arthroscopic hip surgery is gaining popularity globally.<sup>12</sup> Despite being minimally invasive, patients undergoing arthroscopic hip surgery may still experience severe pain after the procedure.<sup>13</sup>

Perioperative pain, if inadequately controlled, can increase the risk of perioperative complications (including delirium, pulmonary complications, and cardiovascular events), delay ambulation, decrease short-term mobility, interfere with rehabilitation, increase hospital length of stay, and even increase the mortality and morbidity, leading to poor functional prognosis.<sup>14-19</sup> In elderly patients, the risk of perioperative adverse events is higher due to polypharmacy and multimorbidity.<sup>20-22</sup> In contrast, adequate pain management has been shown to facilitate postoperative

1  
2  
3  
4 mobilization, improve mobility and promote better functional recovery.<sup>23-</sup>

5  
6 <sup>26</sup> Early mobilization has been associated with reducing postoperative  
7  
8 complications, including pneumonia, venous thromboembolism, pressure  
9  
10 ulcers, and delirium.<sup>27-29</sup> Therefore, optimal perioperative analgesia can  
11  
12 facilitate elderly patients' perioperative recovery.<sup>30-33</sup>  
13  
14  
15  
16

17 Traditionally, opioid analgesia is considered the basis of perioperative  
18  
19 pain management.<sup>34-37</sup> However, opioid-related complications such as  
20  
21 delirium, urinary retention, nausea, constipation and respiratory depression  
22  
23 may occur and can delay patients' recovery and discharge.<sup>38-43</sup> Considering  
24  
25 these adverse events, especially the higher incidence of cognitive deficits  
26  
27 in elderly patients suffering a hip fracture, opioid analgesics are often  
28  
29 selected hesitantly.<sup>44-48</sup> In addition, in light of the current opioid crisis,  
30  
31 strategies to minimize opioid use, including the use of multimodal  
32  
33 perioperative pain management strategies with opioid-sparing oral and  
34  
35 intravenous medications, regional anesthesia and analgesic techniques  
36  
37 have become an increasing clinical focus in hip surgical procedures in  
38  
39 elderly patients.<sup>49-53</sup>  
40  
41  
42  
43  
44  
45  
46  
47

48 Peripheral nerve blocks (including lumbar plexus block, femoral  
49  
50 nerve block, fascia iliac compartment block, 3-in-1 femoral nerve block,  
51  
52 sacral plexus block, obturator block, and sciatic nerve block) and some  
53  
54 inter-fascial plane blocks (such as quadratus lumborum block) have also  
55  
56 been suggested to decrease postoperative pain and opioid use during hip  
57  
58  
59  
60

1  
2  
3  
4 surgery.<sup>54-61</sup> However, peripheral nerve blocks may induce weakness of the  
5  
6 quadriceps muscles, delay hospital discharge, and even predispose the  
7  
8 patient to fall.<sup>62-65</sup> In some cases, it is difficult to position the patient as the  
9  
10 extreme pain, particularly in hip fractures, accompanied by the deep depth  
11  
12 of the block target, the lumbar plexus or quadratus lumborum block will  
13  
14 become difficult.<sup>66-68</sup> In addition, another difficulty of adequate regional  
15  
16 analgesia for hip pain is the complex innervation of the hip joint.<sup>69</sup> High  
17  
18 branches of the femoral and obturator nerves provide innervation to the  
19  
20 anterior hip capsule. The accessory obturator nerve was also found to  
21  
22 innervate the medial capsule.<sup>70 71</sup> In this situation, the coverage of the  
23  
24 articular nerve supply to the hip joint is critical for adequate analgesia.  
25  
26 Hence, a simple, easy-to-perform, analgesia adequate, and motor-sparing  
27  
28 regional analgesia technique is the ideal regional analgesia technique for  
29  
30 hip surgery.  
31  
32  
33  
34  
35  
36  
37  
38  
39

40 Pericapsular nerve group (PENG) block is a relatively new peripheral  
41  
42 nerve block technique, first described by Giron-Arango in patients with hip  
43  
44 fractures, which was based on the complex innervation of the hip joint.<sup>72</sup>  
45  
46 The target of the PENG block is the musculofascial plane between the  
47  
48 psoas tendon anteriorly and the pubic ramus posteriorly. It can be easily  
49  
50 performed in the supine position, avoiding the additional pain from  
51  
52 positioning the patient for peripheral nerve block.<sup>73-76</sup> In theory, PENG  
53  
54 block has potential advantages over traditional forms of regional analgesia  
55  
56  
57  
58  
59  
60



1  
2  
3  
4 for pain originating from the hip, as local anesthetic deposits in this target  
5  
6 could provide a broader and more complete block effect on the coverage  
7  
8 area of sensory nerves innervating the hip.<sup>77-87</sup> Thus, it has the potential  
9  
10 advantage of reducing postoperative pain without motor-blocking.<sup>88-91</sup>  
11  
12 PENG block has been described as easy to perform in the supine position  
13  
14 and as an effective and motor-sparing regional analgesia technique for hip  
15  
16 surgery.<sup>92-95</sup>  
17  
18  
19  
20  
21

22 The excellent analgesic benefit of PENG block for perioperative  
23  
24 analgesia in hip surgery was highlighted in a significant number of  
25  
26 publications of case reports, case series, reviews and retrospective studies  
27  
28 <sup>77-83, 92-95</sup>, but prospective and randomized controlled trials are scarce.<sup>84-87</sup>  
29  
30 Inadvertent quadriceps weakness was also reported in patients following  
31  
32 the PENG block.<sup>96-98</sup> Due to limited clinical evidence, the efficacy and  
33  
34 safety of the PENG block, particularly the efficacy of motor function  
35  
36 preservation and the incidence of block-related adverse events remain  
37  
38 controversial until now.<sup>99-103</sup>  
39  
40  
41  
42  
43  
44

45 Therefore, it is necessary to conduct a systematic review and meta-  
46  
47 analysis to analyze the clinical efficacy of PENG block on perioperative  
48  
49 pain management in elderly patients with hip diseases. The outcomes of  
50  
51 this systematic review will provide evidence for better clinical decision-  
52  
53 making and possible future directions for further clinical trials.  
54  
55  
56  
57

## 58 Objectives

59  
60

1  
2  
3  
4 We are performing this protocol of systematic review with meta-  
5  
6 analysis and trial sequential analysis (TSA) of randomized clinical trials to  
7  
8 evaluate the clinical efficacy and safety of PENG block on perioperative  
9  
10 pain management in elderly patients with hip diseases.  
11  
12

## 13 14 **METHODS AND ANALYSIS**

### 15 16 **Design and registration of the review**

17  
18 We devised this protocol according to the Preferred Reporting Items  
19  
20 for Systematic Reviews and Meta-Analyses Protocols (PRISMA-P)  
21  
22 guidelines registered with PROSPERO 2022 (registration number:  
23  
24 CRD42022313895).<sup>104</sup> We will perform this systematic review and meta-  
25  
26 analysis based on the Cochrane Handbook and report the results following  
27  
28 the PRISMA statement.<sup>105 106</sup> This study is anticipated to begin searching  
29  
30 in August 2022 and will be completed in January 2023.  
31  
32  
33  
34  
35  
36

### 37 38 **Inclusion criteria for study selection**

#### 39 40 **Types of studies**

41  
42 Only randomized controlled trials (RCTs) involving the clinical  
43  
44 efficacy of PENG block on perioperative pain management in elderly  
45  
46 patients with hip diseases will be included. There will be no language  
47  
48 restrictions.  
49  
50  
51

52  
53 The exclusion criteria were as follows: (1) studies comparing PENG  
54  
55 block versus PENG block combined with other analgesic techniques, or  
56  
57 studies comparing PENG block under different guidance techniques  
58  
59  
60

1  
2  
3  
4 (ultrasound guided or traditional landmark technique); (2) studies with data  
5  
6 that could not be used for statistical analysis, or studies with incomplete  
7  
8 data, or data that could not be extracted after contacting the original authors;  
9  
10 and (3) studies that were duplicate publications, published as letters or  
11  
12 editorials, abstracts from conferences, and reviews.  
13  
14  
15

### 16 17 **Types of participants**

18  
19 Elderly participants ( $\geq 65$  years old) with any hip disease (such as hip  
20  
21 fracture, or hip osteoarthritis) accepting PENG block for perioperative pain  
22  
23 management (including preoperative analgesia, intraoperative anesthesia  
24  
25 management, and postoperative analgesia) will be included. There will be  
26  
27 no limitations on participants' gender, ethnicity, body mass index (BMI),  
28  
29 or American Society of Anesthesiologists (ASA) classification.  
30  
31  
32  
33

### 34 35 **Types of interventions/controls**

36  
37 The intervention group will be the participants who received any kind  
38  
39 of PENG block (including ultrasound-guided, X-ray-guided, CT-guided or  
40  
41 traditional landmark-based techniques), alone or in combination with any  
42  
43 other kind of analgesia technique for perioperative pain management,  
44  
45 while the control group will receive any kind of analgesia technique other  
46  
47 than PENG block for perioperative pain management.  
48  
49  
50  
51

### 52 53 **Types of outcome measures**

#### 54 55 **Primary outcomes**

56  
57 The primary outcome will be the pain intensity after perioperative  
58  
59  
60

1  
2  
3  
4 pain management by PENG block or other analgesia techniques. Pain  
5  
6 intensity, including preoperative and postoperative pain intensity will be  
7  
8 included and assessed by visual analog scale (VAS) scores, numeric rating  
9  
10 scale (NRS) scores or other scale scores. Perioperative static and dynamic  
11  
12 pain intensity after pain management will also be included if possible.  
13  
14  
15

## 16 **Secondary outcomes**

17  
18  
19 **1. Unexpected perioperative femoral nerve block** will be evaluated as  
20  
21 follows if possible.  
22

23  
24 ➤ Incidence of quadriceps motor block (defined as paresis or paralysis of  
25  
26 knee extension and hip adduction) [Knee extension was graded  
27  
28 according to a 3-point scale: 0=normal strength (extension against  
29  
30 gravity and resistance)]; 1=paresis (extension against gravity but not  
31  
32 against resistance); 2=paralysis (no extension possible).<sup>107</sup> Hip  
33  
34 adduction scores of 0, 1, and 2 points indicated decreases in strength of  
35  
36 0%-20%, 21%-70%, and 71%-90% compared with baseline  
37  
38 measurement, respectively.<sup>108</sup>  
39

40  
41 ➤ Mobility of the quadriceps as defined by the Medical Research Council  
42  
43 (MRC) scale.<sup>109</sup>  
44

45  
46 ➤ Quadriceps strength was assessed by measuring the force produced by  
47  
48 voluntary isometric contractions with any type of reliable and valid  
49  
50 stationary dynamometer (such as the Chatillon DPPH-250 force gauge,  
51  
52 AMETEK, USA or Chatillon; AMETEK, Largo, Florida; Lafayette  
53  
54  
55  
56  
57  
58  
59  
60

Instrument, Lafayette, Indiana; and MicroFET, Hoggan Health Industries, West Jordan, Utah).<sup>110 111</sup>

## 2. Perioperative rescue analgesia information

- Perioperative cumulative analgesic consumption: cumulative analgesic consumption for intraoperative anesthesia and cumulative rescue analgesics for preoperative/postoperative analgesia will be included if possible. Any kind of analgesics, such as opioid analgesics and non-steroidal analgesics administered by different delivery methods, such as PCA (patient-controlled analgesia) devices, intravenous, oral, or intramuscular will be included if possible.
- Time to first analgesic request: time from the end of the preoperative pain management procedure to the first analgesic request or time from the end of surgery to the first analgesic request will be included if possible.

## 3. Perioperative complications: if possible

- Block-related adverse events included vascular puncture, paresthesia, local anesthetic toxicity, anaphylaxis, permanent nerve injury, bleeding, or infection.
- Intraoperative adverse effects included hypoxemia (oxygen saturation less than 90% or oxygen partial arterial pressure  $\leq 60$  mmHg); hypotension (defined as a decrease of  $>20\%$  from preanesthetic patient baseline values or a systolic blood pressure less than 90 mmHg);

1  
2  
3  
4 arrhythmia [including bradycardia (defined as HR <55 beats/min);  
5  
6 tachycardia (defined as HR>100 beats/min); any other types of  
7  
8 arrhythmias]; and blood loss.

- 9  
10  
11  
12 ➤ Other adverse effects: including postoperative nausea/vomiting,  
13  
14 pruritus, urinary retention, respiratory depression, sweating, dizziness,  
15  
16 pruritus, urticaria, postoperative arrhythmia, and postoperative  
17  
18 pulmonary complications, were defined as the composite of any  
19  
20 respiratory infection, respiratory failure, pleural effusion, atelectasis,  
21  
22 or pneumothorax.

- 23  
24  
25  
26  
27 **4. Patient recovery:** Length of stay, recovery time (defined as the time  
28  
29 until recovery room discharge criteria were met after surgery), the  
30  
31 quality of postoperative recovery score (such as the Quality of  
32  
33 Recovery-40 questionnaire)<sup>112</sup> and patients' ambulation (such as time-  
34  
35 to-first ambulation and initial ambulation distance) will be included if  
36  
37 possible.

38  
39  
40  
41  
42  
43 **5. Patient satisfaction:**

44  
45 If possible, patient satisfaction with performing the perioperative pain  
46  
47 management techniques or postoperative analgesia will be included.  
48  
49 Satisfaction could be measured by a 5-point Likert scale (1=very  
50  
51 dissatisfied; 2=dissatisfied; 3=neutral; 4=satisfied; 5= very satisfied), 10-  
52  
53 point Likert scale (1= completely unsatisfied; 10=completely satisfied) or  
54  
55  
56  
57  
58  
59  
60

1  
2  
3  
4 a postoperative questionnaire whether the patient would choose the same  
5  
6 anesthetic or analgesia handling by the answer of “yes” or “no”.<sup>113</sup>  
7  
8

### 9 **Exploratory outcomes**

- 10  
11  
12 **1. Perioperative sensory block:** Sensory block was evaluated using a 3-  
13  
14 point scale [0=no block, 1=analgesia (patient can feel touch, not cold),  
15  
16 2=anesthesia (patient cannot feel touch)], which was assessed in the  
17  
18 anterior, lateral and medial aspects of the mid-thigh.<sup>107</sup>  
19  
20  
21  
22 **2. Block end time:** defined as the return of motor (if initially impaired)  
23  
24 and/or sensory function, which was acquired from patients’ recall.  
25  
26  
27  
28 **3. Perioperative mortality** was defined as all-cause death during the  
29  
30 operation procedure, within 30 days after surgery, or death during  
31  
32 hospitalization.  
33  
34

### 35 **Search strategy**

36  
37  
38 Two reviewers (Z-JQ and DL) will independently conduct the search,  
39  
40 and any disagreements will be resolved by consulting a third reviewer (Z-  
41  
42 WY) as much as possible. English and Chinese electronic databases will  
43  
44 be searched for published literature from inception to August 2022.  
45  
46 PubMed, Ovid Medline, Cochrane Library, Embase, and Web of Science  
47  
48 will be included in the English databases. The Chinese BioMedical  
49  
50 Literature (Sino-Med), China National Knowledge Infrastructure (CNKI),  
51  
52 Wanfang database and VIP Database will be included in the Chinese  
53  
54 databases. The trial registry database (Clinical Trials.gov and WHO  
55  
56  
57  
58  
59  
60

1  
2  
3  
4 International Clinical Trials Registry Platform) will also be scrutinized to  
5  
6 avoid missing ongoing or unpublished clinical trials. In addition, reference  
7  
8 lists of each study will also be scanned for missing studies.  
9  
10

11 The search strategy will use the following search terms: pericapsular  
12  
13 nerve group block, PENG block, elderly, hip, and randomized controlled  
14  
15 trial. Related search terms will also be translated into Chinese for literature  
16  
17 research and study identification in Chinese databases. The search  
18  
19 strategies are listed in Supplementary Appendix file 1. Comprehensive  
20  
21 updating of the literature search results will be performed prior to the final  
22  
23 publication of systematic reviews to avoid missing published studies  
24  
25 during the systematic review preparation.  
26  
27  
28  
29  
30  
31

## 32 **Data collection and analysis**

### 33 **Selection of studies**

34  
35  
36 At least two review authors (Z-JQ and DL) will be responsible for  
37  
38 screening the potentially eligible studies by reading titles and abstracts. All  
39  
40 identified and relevant full-text publications will be retrieved by screening  
41  
42 the full text thoroughly, and the reasons for excluding the ineligible studies  
43  
44 will be recorded. Any disagreement will be resolved through discussion or  
45  
46 by consulting a third review author (Z-JQ and CG) as much as possible. A  
47  
48 fourth reviewer (Z-WY) will carefully check out all procedures before the  
49  
50 final confirmation of the data extraction. Data extraction will be performed  
51  
52 by at least two authors, and a third author will be consulted if there is any  
53  
54  
55  
56  
57  
58  
59  
60



1  
2  
3  
4 disagreement. Duplicate publications and companion papers of the same  
5  
6 trial will be assessed by all review authors. The study selection process is  
7  
8 displayed in the PRISMA flow diagram (figure 1).  
9  
10

## 11 **Data extraction**

12  
13  
14 Two review authors (Z-JQ and ZL) will use a standardized data  
15  
16 collection form (Excel version 2013, Microsoft Inc, Washington DC, USA)  
17  
18 for data extraction from each included study. The data extraction form  
19  
20 included participants' demographic data, type of hip disease or hip surgery,  
21  
22 type of anesthesia: local, spinal or general anesthesia, period of  
23  
24 perioperative pain management (preoperative analgesia, intraoperative  
25  
26 anesthesia and postoperative analgesia), inclusion and exclusion criteria,  
27  
28 detailed information of analgesia techniques (type of perioperative  
29  
30 analgesia techniques: PENG block or other analgesia techniques; type,  
31  
32 concentration, dose, volume and adjuvant of local anesthetics), and any  
33  
34 outcomes including primary, secondary, and exploratory outcomes. Study  
35  
36 design characteristics including randomization method, allocation  
37  
38 concealment, blinding (patients, treatment providers, outcome  
39  
40 investigators), incomplete outcome data collection and statistical analysis,  
41  
42 and outcome reporting) will be recorded simultaneously. Continuous and  
43  
44 dichotomous data will be recorded as the mean $\pm$  SD and the percentages  
45  
46 or the proportion. If necessary, a third review author (D-XQ) will cross-  
47  
48 check the data to ensure precision. When the necessary information or data  
49  
50  
51  
52  
53  
54  
55  
56  
57  
58  
59  
60

for analysis is missing or incomplete, we will contact the corresponding author of the research via email for the original data as much as possible. Necessary numerical data in the graphs will be extracted by Adobe Photoshop if necessary.<sup>114</sup> Extracted information and data are presented in table 1.

**Table 1** Information and data extraction schedule

| Subject                 | Content                                                                                                                                                                                                                                                                                                                                                                                                                                        |
|-------------------------|------------------------------------------------------------------------------------------------------------------------------------------------------------------------------------------------------------------------------------------------------------------------------------------------------------------------------------------------------------------------------------------------------------------------------------------------|
| Publication information | Title; author; Publish year; Country of origin; Corporate sponsorship; Contact email.                                                                                                                                                                                                                                                                                                                                                          |
| Participant             | Sample size; Age; Sex; Height and weight or BMI; ASA physical status classification levels; Type of hip disease or hip surgery; Inclusion and exclusion criteria if necessary.                                                                                                                                                                                                                                                                 |
| Intervention            | Detail information of PENG block techniques (guidance techniques; target area of block; block needle; needle tracking techniques: in-plane and out-of-plane) Detail information of local anesthetics (type, concentration, dose, volume and adjuvant of local anesthetics).                                                                                                                                                                    |
| Control                 | Detail information of block analgesia techniques (including guidance techniques; target area of block; block needle; needle tracking techniques: in-plane and out-of-plane; detail information of local anesthetics including type, concentration, dose, volume and adjuvant of local anesthetics) and non-block analgesia techniques (including type, dose, and administration method of analgesics).                                         |
| Outcome                 | Primary outcome (pain intensity after perioperative pain management); Secondary outcome measurements (perioperative quadriceps strength; perioperative rescue analgesia information: perioperative cumulative analgesic consumption; time to first analgesic request; patients' recovery; perioperative complications; patients' satisfaction); Exploratory outcomes (perioperative sensory block; block ended time; perioperative mortality). |
| Study design            | Randomization method; Blinding; Allocation concealment; Statistical analysis; Sample size calculation; Outcome reporting.                                                                                                                                                                                                                                                                                                                      |
| Other information       | Type of anesthesia: local, spinal or general anesthesia; Period of perioperative pain management (preoperative analgesia, intraoperative anesthesia and postoperative analgesia); Anesthesia time; Operation time; Assessment method or equipment of outcomes.                                                                                                                                                                                 |

## Quality assessment

The risk of bias in each included study will be assessed independently by two review authors (DL and ZL) under the guidance of the Cochrane

1  
2  
3  
4 risk of bias tool.<sup>115</sup> Methodology (including random sequence generation,  
5  
6 allocation concealment, blinding of participants and personnel, blinding of  
7  
8 outcome assessment, incomplete outcome data, selective outcome  
9  
10 reporting, other risks of bias, and overall risk of bias) will be evaluated.  
11  
12 Each included study will be assessed by the risk of bias assessment tool  
13  
14 from the Cochrane Handbook for Systematic Reviews of Interventions and  
15  
16 then categorized into three levels (low risk of bias, unclear of bias, and high  
17  
18 risk of bias).<sup>105,116,117</sup> Any discrepancies will be settled through discussions  
19  
20 by all review authors or arbitration of a third reviewer (Z-WY). Assessment  
21  
22 of risk of bias is listed in Supplementary Appendix file 2.  
23  
24  
25  
26  
27  
28  
29

### 30 **Measures of treatment effect**

31  
32 Mean differences (MDs) with 95% confidence intervals (CIs) will be  
33  
34 used for continuous outcome data reported by the same scale, and  
35  
36 standardized mean differences (SMDs) with 95% confidence intervals (CIs)  
37  
38 will be used for continuous outcome data reported by different scales. The  
39  
40 relative risks (RRs) with 95% CIs will be used for dichotomous outcome  
41  
42 data.  
43  
44  
45  
46  
47

### 48 **Assessment of heterogeneity**

49  
50 The application of a fixed-effects model or random-effects model  
51  
52 based on statistical heterogeneity is not recommended by the Cochrane  
53  
54 guidelines.<sup>105</sup> Assessment of heterogeneity will be primarily inspected by  
55  
56 forest plots. If there is no indication of funnel plot asymmetry, a random-  
57  
58  
59  
60

1  
2  
3  
4 effects meta-analysis will be performed.<sup>105</sup> If there is an indication of  
5  
6 funnel plot asymmetry, then both a fixed-effect and a random-effect meta-  
7  
8 analysis are problematic. In this situation, a sensitivity analysis will be  
9  
10 performed by excluding small studies or meta-regression will be addressed  
11  
12 directly. A P value <0.05 was assumed to be statistically significant.  
13  
14  
15

### 16 **Trial Sequential Analysis**

17  
18  
19 The required information size (RIS) will be calculated to correct the  
20  
21 risks of random errors by trial sequential analysis (TSA) using the TSA  
22  
23 program version 0.9.5.10 Beta (Copenhagen Trial Unit, Copenhagen,  
24  
25 Denmark).<sup>118-120</sup> TSA program version is available at  
26  
27 <http://www.ctu.dk/tsa>.<sup>121</sup> Each outcome will be detected by RIS, the  
28  
29 cumulative Z-curve, and the TSA monitoring boundaries.<sup>122 123</sup>  
30  
31  
32  
33

34  
35 For continuous outcomes, the observed SD, a mean difference of the  
36  
37 observed SD/2 (clinically meaningful value), an alpha (type I error) of  
38  
39 2.5%, and a beta (type II error) of 10% will be used in the TSA.<sup>124</sup> For  
40  
41 dichotomous outcomes, the proportion or percentage from the control  
42  
43 group, a relative risk variation of 20% (clinically meaningful value), an  
44  
45 alpha (type I error) of 2.5%, and a beta (type II error) of 10% will be used  
46  
47 in the TSA.<sup>125</sup>  
48  
49  
50  
51

### 52 **Subgroup analysis**

53  
54  
55 The results will be comprehensively interpreted through an analysis  
56  
57 of subgroups or subsets as much as possible. If sufficient trials are available,  
58  
59  
60

1  
2  
3  
4 data from different participants' ages, different types of hip disease or  
5  
6 different kinds of surgical techniques of hip surgery, pain management  
7  
8 during different perioperative periods, different pain management  
9  
10 techniques in the control group, different types of anesthesia, and different  
11  
12 types, concentrations, doses, volumes, and adjuvants of local anesthetics  
13  
14 for PENG block will be analyzed independently.  
15  
16  
17

18  
19  
20 ▶ Different participants' ages (PENG block for perioperative analgesia in  
21  
22 elderly patients with different ages as follows:  $65 \text{ years} \leq \text{Patients} < 75 \text{ years}$ ;  
23  
24  $75 \text{ years} \leq \text{Patients} < 80 \text{ years}$ ;  $\text{Patients} \geq 80 \text{ years}$ ).

25  
26  
27 ▶ Different types of hip disease or different kinds of surgical techniques  
28  
29 of hip surgery (hip disease, such as hip fracture and hip osteoarthritis; hip  
30  
31 surgery, such as different kinds of surgical techniques of hip arthroplasty,  
32  
33 hip fracture fixation, and hip arthroscopy procedures).  
34  
35

36  
37  
38 ▶ Pain management of different perioperative periods (PENG block for  
39  
40 preoperative analgesia, intraoperative anesthesia, and postoperative  
41  
42 analgesia).  
43  
44

45  
46 ▶ Different pain management techniques in the control group (such as  
47  
48 block analgesia techniques, including lumbar plexus block, femoral nerve  
49  
50 block, fascia-iliac compartment block, 3-in-1 femoral nerve block, sacral  
51  
52 plexus block, obturator and sciatic nerve block, and quadratus lumborum  
53  
54 block. Non-block analgesia techniques such as opioid and no-opioid  
55  
56 analgesics).  
57  
58  
59  
60

1  
2  
3  
4 ▶ Different types of anesthesia (such as local anesthesia, spinal anesthesia  
5  
6 or general anesthesia).

7  
8  
9 ▶ Different volumes, concentrations, doses, and adjuvants of local  
10  
11 anesthetics for PENG block.

12  
13  
14 The interaction p value will be considered to test the statistically  
15  
16 significant subgroup difference; if testing for interaction  $p < 0.05$  (a  
17  
18 significant difference between subgroups exists), the results for individual  
19  
20 subgroups will be reported separately.<sup>105</sup>

### 21 22 23 24 **Sensitivity analysis**

25  
26  
27 Sensitivity analysis will be applied after the analysis of subgroups or  
28  
29 subsets to evaluate the stability of the combined results, which could be  
30  
31 affected by uncertain assumptions of data and usage. Significant changes  
32  
33 in the pooled results may indicate significant heterogeneity in the included  
34  
35 studies. Low-quality studies, defined as high-risk bias studies according to  
36  
37 the Cochrane risk of bias tool assessment, will be excluded. Then, the  
38  
39 included studies will be re-analyzed to detect obvious differences between  
40  
41 the combined effects. The stability of the pooled estimations will be  
42  
43 detected by removing each included study if necessary.

### 44 45 46 47 48 **Assessment of publication biases**

49  
50  
51 Egger's regression test and funnel plot analysis will be performed to  
52  
53 estimate the potential publication bias, while more than ten original studies  
54  
55 involved an outcome.<sup>126 127</sup> The symmetric pattern of the funnel plot by  
56  
57  
58  
59  
60

1  
2  
3  
4 trim-and-fill analysis will also be used to confirm the potential publication  
5  
6 bias. The effect sizes of each included study will normally be  
7  
8 symmetrically distributed around the center of a funnel plot in the absence  
9  
10 of publication bias.<sup>128</sup> Publication biases will be detected by Stata/MP 16.0  
11  
12 (Stata Corp, College Station, TX, USA).  
13  
14  
15

### 16 17 **Grading the quality of evidence**

18  
19 The quality of evidence for each outcome will be assessed using the  
20  
21 Grading of Recommendations Assessment, Development and Evaluation  
22  
23 (GRADE) criteria.<sup>129</sup> The quality of effect estimates will be classified as  
24  
25 high, moderate, low or very low depending on the risk of bias, consistency,  
26  
27 directness, precision and publication bias.<sup>129</sup> Data from randomized  
28  
29 controlled trials are classified as high-quality evidence according to  
30  
31 GRADE. However, it can be degraded according to the risk of bias,  
32  
33 imprecision, inconsistency, indirectness, or publication bias.  
34  
35  
36  
37  
38  
39

### 40 41 **Patient and public involvement statement**

42  
43 Patients or the public were not involved in the design, conduct,  
44  
45 reporting, or dissemination plans of our research.  
46  
47

## 48 49 **DISCUSSION**

50  
51 More and more elderly patients suffer from hip diseases in the global  
52  
53 accelerating aging process. As the main therapy for hip diseases, hip  
54  
55 surgery is often associated with moderate to severe perioperative pain.  
56  
57 Optimal perioperative analgesia can decrease the risk of perioperative  
58  
59  
60

1  
2  
3  
4 complications and facilitate elderly patient perioperative recovery. Opioid  
5  
6 analgesics are often selected hesitantly as opioid-related complications,  
7  
8 which can delay patient recovery and discharge. Regional anesthesia and  
9  
10 analgesic techniques for perioperative pain management have gradually  
11  
12 become the clinical focus in elderly patients with hip diseases to facilitate  
13  
14 patient recovery. A simple, easy-to-perform, adequate analgesia and  
15  
16 motor-sparing regional analgesia technique is ideal for perioperative pain  
17  
18 management of hip diseases.  
19  
20  
21  
22  
23

24  
25 The PENG block is a relatively new, easy-to-perform, analgesia  
26  
27 adequate, and motor-sparing peripheral nerve block technique. The benefit  
28  
29 of PENG block for perioperative analgesia in hip surgery was based on  
30  
31 many publications of case reports, case series, reviews, and retrospective  
32  
33 studies. However, prospective and randomized controlled trials are rare.  
34  
35 Due to the limited clinical evidence, the efficacy and safety of the PENG  
36  
37 block remain unclear.  
38  
39  
40  
41  
42

43 This systematic review will provide an overview of the current state  
44  
45 of evidence on the clinical efficacy and safety of the PENG block for  
46  
47 perioperative analgesia in elderly patients with hip disease. We will  
48  
49 examine the perioperative analgesia efficacy, the advantage of motor  
50  
51 function preservation and the incidence of block-related adverse events of  
52  
53 PENG block. The results of this systematic review will facilitate clinical  
54  
55 decision-making on better perioperative pain management of elderly  
56  
57  
58  
59  
60



1  
2  
3  
4 patients with hip disease.  
5

6 This systematic review protocol was rigorously performed according  
7 to the Preferred Reporting Items for Systematic Review and Meta-  
8 Analyses Protocols (PRISMA-P) guidelines. The strengths of our  
9 systematic review are as follows: First, a comprehensive literature search  
10 of English and Chinese databases will be performed. Second, we will  
11 perform multivariable analysis (including subgroup analysis, trial  
12 sequential analysis for random errors, sensitivity analysis, study quality  
13 assessment, funnel plots, and Egger's regression test for publication bias)  
14 to improve the quality of the evidence. Third, literature retrieval, data  
15 extraction, and study quality assessment will be performed independently  
16 according to the guidelines by at least two review authors. Any  
17 disagreement will be resolved through discussion or by consulting another  
18 review author as much as possible.  
19  
20  
21  
22  
23  
24  
25  
26  
27  
28  
29  
30  
31  
32  
33  
34  
35  
36  
37  
38  
39

40 Limitations are as follows: First, studies with different perioperative  
41 periods, hip diseases, or hip surgeries will be included, leading to potential  
42 heterogeneity. Second, PENG block is a relatively new peripheral nerve  
43 block technique, so the sample size of each included study may be limited,  
44 and the number of studies with available data for subgroup analyses may  
45 be small. Third, studies with high-level evidence such as well-designed  
46 randomized controlled trials with double-blind designs may be limited, as  
47 it is difficult to perform blinding for different block techniques in different  
48  
49  
50  
51  
52  
53  
54  
55  
56  
57  
58  
59  
60

1  
2  
3  
4 puncture positions. Fourth, PENG block is a relatively new peripheral  
5  
6 nerve block technique. It is difficult to define a significant clinical plausible  
7  
8 value of mean difference and relative risk increase/decrease during  
9  
10 literature research or clinical experience. Therefore, a significant clinical  
11  
12 plausible value will be defined according to TSA guidelines.  
13  
14  
15

## 16 **ETHICS AND DISSEMINATION**

17  
18  
19 Ethical approval was not required for this systematic review protocol.  
20  
21  
22 The findings will be disseminated through peer-reviewed publications.  
23  
24

### 25 **Timelines**

26  
27 Formal screening of search results will begin in August 2022. Data  
28  
29 extraction will begin in November 2022. The project will be complete in  
30  
31  
32 January 2023.  
33  
34

### 35 **Author Contributions**

36  
37 Z-JQ and DL conceived the idea for this systematic review. All  
38  
39 authors (Z-JQ, DL, CG, ZL, D-XQ, Z-WY) developed the methodology  
40  
41 for the systematic review. The manuscript was drafted by Z-JQ and DL,  
42  
43 and revised by all authors. CG and Z-WY will screen potential studies, and  
44  
45 perform duplicate independent data abstraction. Z-JQ and ZL will  
46  
47 undertake a risk of bias assessment and assess the evidence quality. Z-JQ  
48  
49 and DL will conduct the data synthesis. All authors contributed to the  
50  
51 research and agreed to be responsible for all aspects of the work.  
52  
53  
54  
55  
56  
57

### 58 **Funding**

59  
60 None.

## Competing interests

None declared.

## Data availability statement

Not applicable for this protocol.

## Patient consent for publication

No patient was involved.

## Provenance and peer review

Not commissioned; externally peer reviewed.

## REFERENCES

- 1 World Health Organization. Ageing and health. 2020. <https://www.who.int/news-room/fact-sheets/detail/ageing-and-health>. Accessed May 28, 2022.
- 2 Centers for Disease Control and Prevention. Injury prevention & control: hip fractures among older adults. <https://www.cdc.gov/falls/hip-fractures.html>. Accessed May 28, 2022.
- 3 Katz JN, Arant KR, Loeser RF. Diagnosis and Treatment of Hip and Knee Osteoarthritis: A Review. *JAMA* 2021; 325:568-78.
- 4 Fu M, Zhou H, Li Y, *et al*. Global, regional, and national burdens of hip osteoarthritis from 1990 to 2019: estimates from the 2019 Global Burden of Disease Study. *Arthritis Res Ther* 2022; 24:8.
- 5 Hasan K, Shankar S, Sharma A, *et al*. Hip surgery and its evidence base: progress over a decade? *J Orthop Traumatol* 2016;17: 291-95.
- 6 Antoniou J, Silotch C, Epure LL, *et al*. Elective Total Hip Arthroplasties in Nonagenarians-Age Does Matter: A National Surgical Quality Improvement Program Study. *J Arthroplasty* 2022: S0883-5403(22)00084-5.
- 7 Cui L, Zhao S, Tian H, *et al*. Curative efficacy of surgical procedures for older patients with femoral neck fracture: a network meta-analysis and systematic review. *J Orthop Surg Res* 2022; 17:127.
- 8 Cross GWV, Sobti AS, Khan T. Hip arthroscopy in osteoarthritis: Is it an option? *J Clin*

- 1  
2  
3  
4 [Orthop Trauma](#) 2021; 22:101617.
- 5  
6 9 Morrison C, Brown B, Lin DY, *et al.* Analgesia and anesthesia using the pericapsular  
7 nerve group block in hip surgery and hip fracture: a scoping review. [Reg Anesth Pain](#)  
8 [Med](#) 2021; 46: 169-75.
- 9  
10  
11 10 Abou-Setta AM, Beaupre LA, Rashid S, *et al.* Comparative effectiveness of pain  
12 management interventions for hip fracture: a systematic review. [Ann Intern Med](#) 2011;  
13 155: 234-45.
- 14  
15  
16 11 Orozco S, Muñoz D, Jaramillo S, *et al.* Pericapsular nerve group (PENG) block for  
17 perioperative pain control in hip arthroscopy. [J Clin Anesth](#) 2020; 59:3-4.
- 18  
19  
20 12 Bozic KJ, Chan V, Valone FH 3rd, *et al.* Trends in hip arthroscopy utilization in the  
21 United States. [J Arthroplast](#) 2013; 28:140-43.
- 22  
23  
24 13 Bech NH, Hulst AH, Spuijbroek JA, *et al.* Perioperative pain management in hip  
25 arthroscopy; What options are there? [J Hip Preserv Surg](#) 2016; 3:181-9.
- 26  
27  
28 14 Gan TJ. Poorly controlled postoperative pain: prevalence, consequences, and  
29 prevention. [J Pain Res](#) 2017;10: 2287-98.
- 30  
31  
32 15 Pozek JJ, De Ruyter M, Khan TW. Comprehensive Acute Pain Management in the  
33 Perioperative Surgical Home. [Anesthesiol Clin](#) 2018;36: 295-307.
- 34  
35  
36 16 Tsinaslanidis G, Tsinaslanidis P, Mahajan RH. Perioperative Pain Management in  
37 Patients Undergoing Total Hip Arthroplasty: Where Do We Currently Stand? [Cureus](#)  
38 2020; 12: e9049.
- 39  
40  
41 17 Pepper AM, Mercuri JJ, Behery OA, *et al.* Total Hip and Knee Arthroplasty  
42 Perioperative Pain Management: What Should Be in the Cocktail. [JBJS Rev](#) 2018; 6:  
43 e5.
- 44  
45  
46 18 Pyati S, Gan TJ. Perioperative pain management. [CNS Drugs](#) 2007; 21:185-211.
- 47  
48  
49 19 Morrison RS, Magaziner J, Gilbert M, *et al.* Relationship between pain and opioid  
50 analgesics on the development of delirium following hip fracture. [J Gerontol A Biol Sci](#)  
51 [Med Sci](#) 2003; 58:76e81.
- 52  
53  
54 20 Feldt KS, Oh HL. Pain and hip fracture outcomes for older adults. [Orthop Nurs](#) 2000;  
55 19:35e44.
- 56  
57  
58 21 Roche JJ, Wenn RT, Sahota O, *et al.* Effect of comorbidities and postoperative  
59  
60

- 1  
2  
3 complications on mortality after hip fracture in elderly people: prospective  
4 observational cohort study. *BMJ* 2005; 331:1374.  
5  
6  
7  
8 22 Shellito AD, Dworsky JQ, Kirkland PJ, *et al.* Perioperative Pain Management Issues  
9 Unique to Older Adults Undergoing Surgery: A Narrative Review. *Ann Surg Open*  
10 2021;2: e072.  
11  
12  
13 23 Tan M, Law LS, Gan TJ. Optimizing pain management to facilitate Enhanced  
14 Recovery After Surgery pathways. *Can J Anaesth* 2015; 62:203-18.  
15  
16  
17 24 Ranawat AS, Ranawat CS. Pain management and accelerated rehabilitation for total  
18 hip and total knee arthroplasty. *J Arthroplasty* 2007; 22:12-5.  
19  
20  
21 25 Wan HY, Li SY, Ji W, *et al.* Fascia Iliaca Compartment Block for Perioperative Pain  
22 Management of Geriatric Patients with Hip Fractures: A Systematic Review of  
23 Randomized Controlled Trials. *Pain Res Manag* 2020; 2020:8503963.  
24  
25  
26 26 Wang S, Zhang T, Wang P, *et al.* The Impact of Perioperative Multimodal Pain  
27 Management on Postoperative Outcomes in Patients (Aged 75 and Older) Undergoing  
28 Short-Segment Lumbar Fusion Surgery. *Pain Res Manag* 2022; 2022:9052246.  
29  
30  
31 27 Baer M, Neuhaus V, Pape HC, *et al.* Influence of mobilization and weight bearing on  
32 in-hospital outcome in geriatric patients with hip fractures. *SICOT J* 2019; 5:4.  
33  
34  
35 28 Guerra ML, Singh PJ, Taylor NF. Early mobilization of patients who have had a hip or  
36 knee joint replacement reduces length of stay in hospital: a systematic review. *Clin*  
37 *Rehabil* 2015; 29:844-54.  
38  
39  
40 29 Okamoto T, Ridley RJ, Edmondston SJ, *et al.* Day-of Surgery Mobilization Reduces  
41 the Length of Stay After Elective Hip Arthroplasty. *J Arthroplasty* 2016; 31:2227-30.  
42  
43  
44 30 Pepper AM, Mercuri JJ, Behery OA, *et al.* Total Hip and Knee Arthroplasty  
45 Perioperative Pain Management: What Should Be in the Cocktail. *JBJS Rev* 2018;6:  
46 e5.  
47  
48  
49 31 Ruel M, Boussat B, Boudissa M, *et al.* Management of preoperative pain in elderly  
50 patients with moderate to severe cognitive deficits and hip fracture: a retrospective,  
51 monocentric study in an orthogeriatric unit. *BMC Geriatr* 2021; 21:575.  
52  
53  
54 32 Bech NH, Hulst AH, Spuijbroek JA, *et al.* Perioperative pain management in hip  
55 arthroscopy; what options are there? *J Hip Preserv Surg* 2016; 3:181-9.  
56  
57  
58  
59  
60

- 1  
2  
3  
4 33 Karam JA, Schwenk ES, Parvizi J. An Update on Multimodal Pain Management After  
5 Total Joint Arthroplasty. *J Bone Joint Surg Am* 2021; 103:1652-62.  
6  
7  
8 34 Baker DW. History of The Joint Commission's Pain Standards: Lessons for Today's  
9 Prescription Opioid Epidemic. *JAMA* 2017; 317: 1117-18.  
10  
11 35 El Moheb M, Mokhtari A, Han K, *et al.* Pain or No Pain, We Will Give You Opioids:  
12 Relationship Between Number of Opioid Pills Prescribed and Severity of Pain after  
13 Operation in US vs Non-US Patients. *J Am Coll Surg* 2020; 231:639-48.  
14  
15  
16 36 Loh FE, Herzig SJ. Pain in the United States: Time for a Culture Shift in Expectations,  
17 Messaging, and Management. *J Hosp Med* 2019;14: 787-88.  
18  
19  
20 37 Hyland SJ, Brockhaus KK, Vincent WR, *et al.* Perioperative Pain Management and  
21 Opioid Stewardship: A Practical Guide. *Healthcare (Basel)* 2021; 9:333.  
22  
23  
24 38 Oderda GM, Senagore AJ, Morland K, *et al.* Opioid-related respiratory and  
25 gastrointestinal adverse events in patients with acute postoperative pain: prevalence,  
26 predictors, and burden. *J Pain Palliat Care Pharmacother* 2019; 33:82-97.  
27  
28  
29 39 Kane-Gill SL, Rubin EC, Smithburger PL, *et al.* The cost of opioid-related adverse drug  
30 events. *J Pain Palliat Care Pharmacother.* 2014; 28:282-93.  
31  
32  
33 40 Oderda GM, Said Q, Evans RS, *et al.* Opioid-related adverse drug events in surgical  
34 hospitalizations: impact on costs and length of stay. *Ann Pharmacother* 2007; 41:400-  
35 6.  
36  
37  
38 41 Brat GA, Agniel D, Beam A, *et al.* Postsurgical prescriptions for opioid naive patients  
39 and association with overdose and misuse: retrospective cohort study. *BMJ* 2018; 360:  
40 j5790.  
41  
42  
43 42 Brummett CM, Waljee JF, Goesling J, *et al.* New Persistent Opioid Use After Minor  
44 and Major Surgical Procedures in US Adults. *JAMA Surg* 2017;152: e170504.  
45  
46  
47 43 Chau DL, Walker V, Pai L, *et al.* Opiates and elderly: use and side effects. *Clin Interv*  
48 *Aging* 2008; 3:273.  
49  
50  
51 44 Gazelka HM, Leal JC, Lapid MI, *et al.* Opioids in Older Adults: Indications, Prescribing,  
52 Complications, and Alternative Therapies for Primary Care. *Mayo Clin Proc* 2020;  
53 95:793-800.  
54  
55  
56 45 Bitsch M, Foss N, Kristensen B, *et al.* Pathogenesis of and management strategies  
57  
58  
59  
60

- 1  
2  
3  
4 for postoperative delirium after hip fracture: a review. *Acta Orthop Scand* 2004;  
5 75:378-89.  
6  
7  
8 46 Amador LF, Goodwin JS. Postoperative delirium in the older patient. *J Am Coll Surg*  
9 2005; 200:767-73.  
10  
11  
12 47 Bicket MC, Brat GA, Hutfless S, *et al*. Optimizing opioid prescribing and pain treatment  
13 for surgery: Review and conceptual framework. *Am J Health Syst Pharm* 2019 Sep  
14 3;76(18):1403-1412.  
15  
16  
17 48 Pasero CL, McCaffery M. Reluctance to order opioids in elders. *Am J Nurs* 1997;  
18 97:20-23.  
19  
20  
21 49 Chia PA, Cannesson M, Bui CCM. Opioid free anesthesia: feasible? *Curr Opin*  
22 *Anaesthesiol* 2020; 33:512-17.  
23  
24  
25 50 Kharasch ED, Avram MJ, Clark JD. Rational Perioperative Opioid Management in the  
26 Era of the Opioid Crisis. *Anesthesiology* 2020;132: 603-05.  
27  
28  
29 51 Larach DB, Hah JM, Brummett CM. Perioperative Opioids, the Opioid Crisis, and the  
30 Anesthesiologist. *Anesthesiology* 2022; 136:594-608.  
31  
32  
33 52 Everson M, McLain N, Collins MJ, *et al*. Perioperative Pain Management Strategies in  
34 the Age of an Opioid Epidemic. *J Perianesth Nurs* 2020; 35:347-52.  
35  
36  
37 53 Bugada D, Bellini V, Lorini LF, *et al*. Update on Selective Regional Analgesia for Hip  
38 Surgery Patients. *Anesthesiol Clin* 2018; 36:403-15.  
39  
40  
41 54 68. Hogan MV, Grant RE, Lee L Jr. Analgesia for total hip and knee arthroplasty: a  
42 review of lumbar plexus, femoral, and sciatic nerve blocks. *American Journal of*  
43 *Orthopedics* 2009; 38: E129–E133.  
44  
45  
46 55 Foss NB, Kristensen BB, Bundgaard M, *et al*. Fascia iliaca compartment blockade for  
47 acute pain control in hip fracture patients: a randomized, placebo-controlled trial.  
48 *Anesthesiology* 2007; 106:773-78.  
49  
50  
51  
52 56 Haines L, Dickman E, Ayvazyan S, *et al*. Ultrasound-guided fascia iliaca compartment  
53 block for hip fractures in the emergency department. *J Emerg Med* 2012; 43:692-97.  
54  
55  
56 57 Unneby A, Svensson O, Gustafson Y, *et al*. Femoral nerve block in a representative  
57 sample of elderly people with hip fracture: a randomised controlled trial. *Injury* 2017;  
58 48:1542-49.  
59  
60

- 1  
2  
3  
4 58 Beaudoin FL, Haran JP, Liebmann O. A comparison of ultrasound-guided three-in-  
5 one femoral nerve block versus parenteral opioids alone for analgesia in emergency  
6 department patients with hip fractures: a randomized controlled trial. *Acad Emerg Med*  
7 2013; 20: 584-91.  
8  
9  
10  
11 59 Desmet M, Vermeylen K, Van Herreweghe I, *et al.* A longitudinal Supra-Inguinal fascia  
12 Iliaca compartment block reduces morphine consumption after total hip arthroplasty.  
13 *Reg Anesth Pain Med* 2017;42: 327-33.  
14  
15  
16  
17 60 Gasanova I, Alexander JC, Estrera K, *et al.* Ultrasound-Guided suprainguinal fascia  
18 iliaca compartment block versus periarticular infiltration for pain management after total  
19 hip arthroplasty: a randomized controlled trial. *Reg Anesth Pain Med* 2019;44:206-11.  
20  
21  
22  
23 61 Kuchálik J, Magnuson A, Lundin A, *et al.* Local infiltration analgesia or femoral nerve  
24 block for postoperative pain management in patients undergoing total hip arthroplasty.  
25 A randomized, double-blind study. *Scand J Pain* 2017; 16:223-30.  
26  
27  
28  
29 62 Gasanova I, Alexander JC, Estrera K, *et al.* Ultrasound-Guided suprainguinal fascia  
30 iliaca compartment block versus periarticular infiltration for pain management after total  
31 hip arthroplasty: a randomized controlled trial. *Reg Anesth Pain Med* 2019;44: 206-  
32 11.  
33  
34  
35  
36  
37 63 Behrends M, Yap EN, Zhang AL, *et al.* Preoperative fascia Iliaca block does not  
38 improve analgesia after arthroscopic hip surgery, but causes quadriceps muscles  
39 weakness: a randomized, double-blind trial. *Anesthesiology* 2018;129: 536-43.  
40  
41  
42  
43 64 Johnson RL, Kopp SL, Hebl JR, *et al.* Falls and major orthopaedic surgery with  
44 peripheral nerve blockade: a systematic review and meta-analysis. *Br J Anaesth* 2013;  
45 110:518-28.  
46  
47  
48  
49 65 Gadsden JC, Lindenmuth DM, Hadzic A, *et al.* Lumbar plexus block using high-  
50 pressure injection leads to contralateral and epidural spread. *Anesthesiology* 2008;  
51 109:683-88.  
52  
53  
54  
55 66 Brixel SM, Biboulet P, Swisser F, *et al.* Posterior quadratus lumborum block in total  
56 hip arthroplasty: a randomized controlled trial. *Anesthesiology* 2021;134: 722-33.  
57  
58  
59  
60



- 1  
2  
3  
4 67 Kukreja P, MacBeth L, Sturdivant A, *et al.* Anterior quadratus lumborum block  
5 analgesia for total hip arthroplasty: a randomized, controlled study. *Reg Anesth Pain*  
6 *Med* 2019; 44: rapm-2019-100804-9.  
7  
8  
9 68 Jadon A, Kedia SK, Dixit S, *et al.* Comparative evaluation of femoral nerve block and  
10 intravenous fentanyl for positioning during spinal anaesthesia in surgery of femur  
11 fracture. *Indian J Anaesth* 2014; 58:705-8.  
12  
13 69 Birnbaum K, Prescher A, Hessler S, *et al.* The sensory innervation of the hip joint—an  
14 anatomical study. *Surg Radiol Anat* 1997; 19: 371-5.  
15  
16 70 Short AJ, Barnett JJG, Gofeld M, *et al.* Anatomic Study of Innervation of the Anterior  
17 Hip Capsule: Implication for Image-Guided Intervention. *Reg Anesth Pain Med* 2018;  
18 43:186-92.  
19  
20 71 Gerhardt M, Johnson K, Atkinson R, *et al.* Characterisation and classification of the  
21 neural anatomy in the human hip joint. *Hip Int* 2012; 22:75-81.  
22  
23 72 Giron-Arango L, Peng PWH, Chin KJ, *et al.* Pericapsular nerve group (PENG) block  
24 for hip fracture. *Reg Anesth Pain Med* 2018; 43: 859-63.  
25  
26 73 Acharya U, Lamsal R. Pericapsular Nerve Group Block: An Excellent Option for  
27 Analgesia for Positional Pain in Hip Fractures. *Case Rep Anesthesiol* 2020;  
28 2020:1830136.  
29  
30 74 Jadon A, Mohsin K, Sahoo RK, *et al.* Comparison of supra-inguinal fascia iliaca versus  
31 pericapsular nerve block for ease of positioning during spinal anaesthesia: A  
32 randomised double-blinded trial. *Indian J Anaesth* 2021; 65:572-78.  
33  
34 75 Sahoo RK, Jadon A, Sharma SK, *et al.* Peri-capsular nerve group block provides  
35 excellent analgesia in hip fractures and positioning for spinal anaesthesia: A  
36 prospective cohort study. *Indian J Anaesth* 2020; 64:898-900.  
37  
38 76 Mistry T, Sonawane K, Raghuvanshi A, *et al.* Preemptive pericapsular nerve group  
39 block to facilitate sitting position for neuraxial anesthesia in patients with acetabular  
40 fractures: A case series. *Saudi J Anaesth* 2022; 16:221-25.  
41  
42 77 Orozco S, Muñoz D, Jaramillo S, *et al.* Pericapsular Nerve Group (PENG) block for  
43 perioperative pain control in hip arthroscopy. *J Clin Anesth* 2020; 59:3-4.  
44  
45  
46  
47  
48  
49  
50  
51  
52  
53  
54  
55  
56  
57  
58  
59  
60

- 1  
2  
3  
4 78 Morrison C, Brown B, Lin DY, *et al.* Analgesia and anesthesia using the pericapsular  
5 nerve group block in hip surgery and hip fracture: a scoping review. *Reg Anesth Pain*  
6 *Med* 2021; 46:169-75.  
7  
8  
9  
10 79 Kukreja P, Avila A, Northern T, *et al.* A Retrospective Case Series of Pericapsular  
11 Nerve Group (PENG) Block for Primary Versus Revision Total Hip Arthroplasty  
12 Analgesia. *Cureus* 2020;12: e8200.  
13  
14  
15 80 Mysore K, Sancheti SA, Howells SR, *et al.* Postoperative analgesia with pericapsular  
16 nerve group (PENG) block for primary total hip arthroplasty: a retrospective study. *Can*  
17 *J Anaesth* 2020;67: 1673-74.  
18  
19  
20  
21 81 Kinjo S, Zhang AL. Rescue Pericapsular Nerve Group Block for Hip Arthroscopy: A  
22 Report of 3 Cases. *A A Pract* 2022;16: e01553.  
23  
24  
25 82 Fernicola, Jacob Tannehill I, Tucker CJ, *et al.* The Pericapsular Nerve Group Block  
26 for Perioperative Pain Management for Hip Arthroscopy. *Arthrosc Tech* 2021; 10:  
27 e1799-e1803.  
28  
29  
30  
31 83 Rocha-Romero A, Arias-Mejia K, Salas-Ruiz A, *et al.* Pericapsular nerve group (PENG)  
32 block for hip fracture in the emergency department: a case series. *Anaesth Rep*  
33 2021;9: 97-100.  
34  
35  
36  
37 84 Natrajan P, Bhat RR, Remadevi R, *et al.* Comparative Study to Evaluate the Effect of  
38 Ultrasound-Guided Pericapsular Nerve Group Block Versus Fascia Iliaca  
39 Compartment Block on the Postoperative Analgesic Effect in Patients Undergoing  
40 Surgeries for Hip Fracture under Spinal Anesthesia. *Anesth Essays Res* 2021; 15:285-  
41 89.  
42  
43  
44  
45  
46 85 Mosaffa F, Taheri M, Manafi Rasi A, *et al.* Comparison of pericapsular nerve group  
47 (PENG) block with fascia iliaca compartment block (FICB) for pain control in hip  
48 fractures: A double-blind prospective randomized controlled clinical trial. *Orthop*  
49 *Traumatol Surg Res* 2022; 108:103135.  
50  
51  
52  
53  
54 86 Aliste J, Laya S, Bravo D, *et al.* Randomized comparison between pericapsular  
55 nerve group (PENG) block and suprainguinal fascia iliaca block for total hip  
56 arthroplasty. *Reg Anesth Pain Med* 2021; 46:874-78.  
57  
58  
59  
60

- 1  
2  
3  
4 87 Zheng J, Pan D, Zheng B, *et al.* Preoperative pericapsular nerve group (PENG) block  
5 for total hip arthroplasty: a randomized, placebo-controlled trial. *Reg Anesth Pain Med*  
6 2022; 47:155-60.  
7  
8  
9 88 Hua H, Xu Y, Jiang M, *et al.* Evaluation of Pericapsular Nerve Group (PENG) Block  
10 for Analgesic Effect in Elderly Patients with Femoral Neck Fracture Undergoing Hip  
11 Arthroplasty. *J Healthc Eng* 2022; 2022:7452716.  
12  
13  
14 89 Pascarella G, Costa F, Del Buono R, *et al*; collaborators. Impact of the pericapsular  
15 nerve group (PENG) block on postoperative analgesia and functional recovery  
16 following total hip arthroplasty: a randomised, observer-masked, controlled trial.  
17 *Anaesthesia* 2021; 76: 1492-98.  
18  
19  
20 90 Lin DY, Brown B, Morrison C, *et al.* Pericapsular nerve group block results in a longer  
21 analgesic effect and shorter time to discharge than femoral nerve block in patients  
22 after hip fracture surgery: a single-center double-blinded randomized trial. *J Int Med*  
23 *Res* 2022; 50:3000605221085073.  
24  
25  
26 91 Choi YS, Park KK, Lee B, *et al.* Pericapsular Nerve Group (PENG) Block versus  
27 Supra-Inguinal Fascia Iliaca Compartment Block for Total Hip Arthroplasty: A  
28 Randomized Clinical Trial. *J Pers Med* 2022; 12:408.  
29  
30  
31 92 Sahoo RK, Jadon A, Sharma SK, *et al.* Pericapsular nerve group (PENG) block for hip  
32 fractures: Another weapon in the armamentarium of anesthesiologists. *J Anaesthesiol*  
33 *Clin Pharmacol* 2021; 37:295-96.  
34  
35  
36 93 Black ND, Chin KJ. Pericapsular nerve group (PENG) block: Comments and practical  
37 considerations. *J Clin Anesth* 2019; 56:143-44.  
38  
39  
40 94 Del Buono R, Padua E, Pascarella G, *et al.* Pericapsular nerve group block: an  
41 overview. *Minerva Anesthesiol* 2021; 87:458-66.  
42  
43  
44 95 Bilal B, Öksüz G, Boran ÖF, *et al.* High volume pericapsular nerve group (PENG) block  
45 for acetabular fracture surgery: A new horizon for novel block. *J Clin Anesth* 2020;  
46 62:109702.  
47  
48  
49 96 Endersby RVW, Moser JJ, Ho ECY, *et al.* Motor blockade after iliopsoas plane (IPB)  
50 and pericapsular nerve group (PENG) blocks: A little may go a long way. *Acta*  
51 *Anaesthesiol Scand* 2021; 65:135-36.  
52  
53  
54  
55  
56  
57  
58  
59  
60

- 1  
2  
3  
4 97 Yu HC, Moser JJ, Chu AY, *et al.* Inadvertent quadriceps weakness following the  
5 pericapsular nerve group (PENG) block. *Reg Anesth Pain Med* 2019; 44: 611-13.  
6  
7  
8 98 Ciftci B, Ahiskalioglu A, Altintas HM, *et al.* A possible mechanism of motor blockade  
9 of high volume pericapsular nerve group (PENG) block: A cadaveric study. *J Clin*  
10 *Anesth* 2021; 74:110407.  
11  
12  
13 99 Mistry T, Sonawane KB. Gray zone of pericapsular nerve group (PENG) block. *J Clin*  
14 *Anesth* 2019; 58:123-24.  
15  
16  
17 100 Allard C, Pardo E, de la Jonquière C, *et al.* Comparison between femoral block and  
18 PENG block in femoral neck fractures: A cohort study. *PLoS One* 2021;16: e0252716.  
19  
20  
21 101 Valoriani J, Conti D, Giancesello L, *et al.* Combined pericapsular nerve group and  
22 lateral femoral cutaneous nerve blocks for hip fracture in a polytraumatized patient-A  
23 case report. *Saudi J Anaesth* 2022; 16:211-13.  
24  
25  
26 102 Gong WY, Li N, Chen YY, *et al.* Combination of Pericapsular Nerve Group (PENG)  
27 and Sacral Plexus Blocks for Minimally Invasive Percutaneous Internal Fixation in  
28 Outpatient with Femoral Neck Pathologic Fracture. *Pain Med* 2022; 23:427-428.  
29  
30  
31 103 Luo W, Liang J, Wu J, *et al.* Effects of pericapsular nerve group (PENG) block on  
32 postoperative recovery in elderly patients with hip fracture: study protocol for a  
33 randomised, parallel controlled, double-blind trial. *BMJ Open* 2022; 12: e051321.  
34  
35  
36 104 Shamseer L, Moher D, Clarke M. Preferred reporting items for systematic review and  
37 meta-analysis protocols (PRISMA-P) 2015: elaboration and explanation. *BMJ* 2015;  
38 350: g7647.  
39  
40  
41 105 Higgins JPT, Thomas J, Chandler J, *et al.* Cochrane Handbook for Systematic  
42 Reviews of Interventions version 6.2 (updated February 2021). Cochrane, 2021.  
43 Available: [www.training.cochrane.org/handbook](http://www.training.cochrane.org/handbook).  
44  
45  
46 106 Page MJ, McKenzie JE, Bossuyt PM, *et al.* The PRISMA 2020 statement: an updated  
47 guideline for reporting systematic reviews. *BMJ* 2021; 372: n71.  
48  
49  
50 107 Bravo D, Layera S, Aliste J, *et al.* Lumbar plexus block versus suprainguinal fascia  
51 iliaca block for total hip arthroplasty: a single-blinded, randomized trial. *J Clin Anesth*  
52 2020; 66:109907.  
53  
54  
55  
56  
57  
58  
59  
60

- 1  
2  
3  
4 108 Arnuntasapakul V, Chalachewa T, Leurcharusmee P, *et al.* Ultrasound with  
5 neurostimulation compared with ultrasound guidance alone for lumbar plexus block:  
6 A randomised single blinded equivalence trial. *Eur J Anaesthesiol* 2018; 35: 224-30.  
7  
8  
9 109 McGillivray MK, Haldane C, Doherty C, *et al.* Evaluation of muscle strength following  
10 peripheral nerve surgery: A scoping review. *PMR* 2022; 14 :383-94.  
11  
12  
13 110 Medical Research Council. Aids to the examination of the peripheral nervous system.  
14 Londres; 1976. (Memorandum). Behrends M, Yap EN, Zhang AL, Kolodzie K, Kinjo S,  
15 Harbell MW, Aleshi P. Preoperative Fascia Iliaca Block Does Not Improve Analgesia  
16 after Arthroscopic Hip Surgery, but Causes Quadriceps Muscles Weakness: A  
17 Randomized, Double-blind Trial. *Anesthesiology* 2018; 129:536-43.  
18  
19  
20 111 Maffiuletti NA. Assessment of hip and knee muscle function in orthopaedic practice  
21 and research. *J Bone Joint Surg Am* 2010; 92:220-29.  
22  
23  
24 112 Wessels E, Perrie H, Scribante J, *et al.* Quality of recovery in the perioperative setting:  
25 A narrative review. *J Clin Anesth* 2022; 78:110685.  
26  
27  
28 113 Soares RW, Ruzbarsky JJ, Arner JW, *et al.* Midterm Outcomes After Hip Labral  
29 Augmentation in Revision Hip Arthroscopy. *Am J Sports Med* 2022; 50:1299-05.  
30  
31  
32 114 Gheibi S, Mahmoodzadeh A, Kashfi K, *et al.* Data Extraction from Graphs Using  
33 Adobe Photoshop: Applications for Meta-Analyses. *Int J Endocrinol Metab* 2019;17:  
34 e95216.  
35  
36  
37 115 Higgins JPT, Altman DG, Gøtzsche PC, *et al.* The Cochrane collaboration's tool for  
38 assessing risk of bias in randomised trials. *BMJ* 2011; 343: d5928.  
39  
40  
41 116 Higgins JPT, Savović J, Page MJ, *et al.* Chapter 8: Assessing risk of bias in a  
42 randomized trial. In: Higgins JPT, Thomas J, Chandler J, Cumpston M, Li T, Page MJ,  
43 Welch VA (editors). *Cochrane Handbook for Systematic Reviews of Interventions*  
44 version 6.2 (updated February 2021). Cochrane, 2021. Available from  
45 [www.training.cochrane.org/handbook](http://www.training.cochrane.org/handbook).  
46  
47  
48 117 Savović J, Turner RM, Mawdsley D, *et al.* Association between Risk of-Bias  
49 assessments and results of randomized trials in Cochrane reviews: the ROBES Meta-  
50 Epidemiologic study. *Am J Epidemiol* 2018;187: 1113-22.  
51  
52  
53 118 Wetterslev J, Thorlund K, Brok J, *et al.* Estimating required information size by  
54  
55  
56  
57  
58  
59  
60

- 1  
2  
3  
4 quantifying diversity in random-effects model meta-analyses. *BMC Med Res Methodol*  
5 2009; 9:86.  
6  
7  
8 119 Wetterslev J, Jakobsen JC, Gluud C. Trial sequential analysis in systematic reviews  
9 with meta-analysis. *BMC Med Res Methodol* 2017; 17:39.  
10  
11 120 Wetterslev J, Thorlund K, Brok J, *et al.* Trial sequential analysis may establish when  
12 firm evidence is reached in cumulative meta-analysis. *J Clin Epidemiol* 2008; 61: 64-  
13 75.  
14  
15  
16  
17 121 Thorlund K, Engstrøm J, Wetterslev J, *et al.* User manual for trial sequential analysis  
18 (TSA) Copenhagen trial unit, centre for clinical intervention research, Denmark;  
19 2011. Available: <http://www.ctu.dk/tsa> [Accessed 2021].  
20  
21  
22  
23 122 Imberger G, Thorlund K, Gluud C, *et al.* False-Positive findings in Cochrane meta-  
24 analyses with and without application of trial sequential analysis: an empirical review.  
25 *BMJ Open* 2016;6: e011890.  
26  
27  
28  
29 123 Brok J, Thorlund K, Gluud C, *et al.* Trial sequential analysis reveals insufficient  
30 information size and potentially false positive results in many meta-analyses. *J Clin*  
31 *Epidemiol* 2008; 61:763-9.  
32  
33  
34  
35 124 Norman GR, Sloan JA, Wyrwich KW. Interpretation of changes in health-related  
36 quality of life: the remarkable universality of half a standard deviation. *Med Care* 2003;  
37 41:582-92.  
38  
39  
40  
41 125 Castellini G, Nielsen EE, Gluud C. Comment on: "Cell therapy for heart disease: Trial  
42 sequential analyses of two cochrane reviews". *Clin Pharmacol Ther* 2017; 102:21-4.  
43  
44  
45 126 Egger M, Davey Smith G, Schneider M, *et al.* Bias in meta-analysis detected by a  
46 simple, graphical test. *BMJ* 1997;315: 629-34.  
47  
48  
49 127 Sterne JA, Gavaghan D, Egger M. Publication and related bias in meta-analysis:  
50 power of statistical tests and prevalence in the literature. *J Clin Epidemiol* 2000;  
51 53:1119-29.  
52  
53  
54 128 Mavridis D, Salanti G. How to assess publication bias: funnel plot, trim-and-fill method  
55 and selection models. *Evid Based Ment Health* 2014; 17:30.  
56  
57  
58 129 Guyatt G, Oxman AD, Akl EA, *et al.* Grade guidelines: 1. Introduction-GRADE  
59 evidence profiles and summary of findings tables. *J Clin Epidemiol* 2011; 64:383-94.  
60

1  
2  
3  
4  
5  
6  
7  
8  
9  
10  
11  
12  
13  
14  
15  
16  
17  
18  
19  
20  
21  
22  
23  
24  
25  
26  
27  
28  
29  
30  
31  
32  
33  
34  
35  
36  
37  
38  
39  
40  
41  
42  
43  
44  
45  
46  
47  
48  
49  
50  
51  
52  
53  
54  
55  
56  
57  
58  
59  
60

Figure Legends

Figure 1. The PRISMA flow diagram. PRISMA, Preferred Reporting Items for Systematic Reviews and Meta-analysis.

For peer review only



The PRISMA flow diagram



## Supplementary Appendix file 1: Search strategy

### Search strategy of PubMed as follows:

#1 “Hip” [MeSH Terms] OR Hips [tiab] OR Coxa [tiab] OR Coxas [tiab]

#2 “arthroscopy” [Mesh] or Arthroscopies[af] or Arthroscopic Surgical Procedures [af] or Arthroscopic Surgical Procedure[af] or Procedure, Arthroscopic Surgical[af] or Procedures, Arthroscopic Surgical[af] or Surgical Procedure, Arthroscopic[af] or Surgery, Arthroscopic [af] or Surgical Procedures, Arthroscopic[af] or Arthroscopic Surgery [af] or Arthroscopic Surgeries[af] or Surgeries, Arthroscopic[af]

#3 #1 AND #2

#4 “Hip Fracture” [Mesh] OR “Femoral Neck Fractures” [Mesh] OR Femoral Neck Fracture [tiab] OR Femur Neck Fractures[tiab] OR Femur Neck Fracture [tiab] OR Fractures, Hip [af] OR Trochanteric Fractures [af] OR Fractures, Trochanteric [af] OR Intertrochanteric Fractures [af] OR Fractures, Intertrochanteric [af] OR Subtrochanteric Fractures [af] OR Fractures, Subtrochanteric [af] OR Femoral Fracture[af] OR Fracture, Femoral [af] OR Fractures, Femoral [af] (hip\* or intertrochanteric or subtrochanteric or trochanteric or pertrochanteric or peritrochanteric or femur or femoral or acetabul\*) AND fracture\*

#5 “Osteoarthritis, Hip” [Mesh] OR Hip Osteoarthritis[af] OR Osteoarthritis Of Hip [af] OR Osteoarthritis Of Hips[af] OR Coxarthrosis [af] OR Coxarthroses [af] OR Osteoarthritis of the Hip[af]

#6 Hip Injuries [Mesh] OR Hip Dislocation [Mesh] OR Injuries, Hip [af] OR Dislocation, Hip [af] OR Dislocations, Hip[af] OR Hip Dislocations[af] OR Hip Displacement[af] OR Displacement, Hip[af] OR Displacements, Hip[af] OR Hip Displacements[af] OR Hip Dysplasia[af] OR Dysplasia, Hip[af] OR Dysplasias, Hip[af] OR Hip Dysplasias [af]

#7 “Hip Prosthesis” [Mesh] OR “Arthroplasty, Replacement, Hip” [Mesh] OR Hip Prostheses [af] OR Prostheses, Hip[af] OR Prosthesis, Hip[af] OR Femoral Head Prosthesis[af] OR Femoral Head Prostheses[af] OR Prostheses, Femoral Head [af] OR Prosthesis, Femoral Head [af] OR Arthroplasties, Replacement, Hip [af] OR Arthroplasty, Hip Replacement [af] OR Hip Prosthesis Implantation [af] OR Hip Prosthesis Implantations [af] OR Implantation, Hip Prosthesis [af] OR Prosthesis Implantation, Hip [af] OR Hip Replacement Arthroplasty [af] OR Replacement Arthroplasties, Hip [af] OR Replacement Arthroplasty, Hip [af] OR Arthroplasties, Hip

1  
2  
3  
4 Replacement [af] OR Hip Replacement Arthroplasties [af] OR Hip Replacement, Total [af] OR Total  
5 Hip Replacement [af] OR Total Hip Arthroplasty [af] OR Arthroplasty, Total Hip [af] OR Hip  
6 Arthroplasty, Total [af] OR Total Hip Arthroplasties [af] OR Replacement, Total Hip [af] OR Total  
7 Hip Replacements [af]

8  
9  
10 #8 #3 OR #4 OR #5 OR #6 OR #7

11  
12 #9 “Aged” [Mesh] or "Aged, 80 and over"[Mesh] or "Aged, 65 and over"[Mesh] or Centenarians  
13 [Mesh] or Nonagenarians [Mesh] or Octogenarians [Mesh] or Geriatrics [Mesh] or Elderly [af] or  
14 Centenarian [af] or Nonagenarian [af] or Oldest Old [af] or Octogenarian [af] or aging [af] or aged  
15 [af] or elderly[af] or senior [af] or old [af] or old-age[af].

16  
17 #10 “pericapsular nerve group block” [af] OR PENG [af]

18  
19 #11 #8 AND #9 AND #10

20  
21 #12 “controlled clinical trial” [Publication Type] OR “randomized controlled trial” [Publication  
22 Type] OR “randomized” [Title/Abstract] OR “randomized” [Title/Abstract] OR “Placebo”  
23 [Title/Abstract] OR “randomly” [Title/Abstract] OR “Clinical trial” [Title]

24  
25 #13 (animals [MeSH Terms]) NOT ((human [MeSH Terms]) AND (animals [MeSH Terms]))

26  
27 #14 #11 and #12 not #13

28  
29 **Search strategy of Cochrane library as follows:**

30  
31 #1 MeSH descriptor: [Hip] explode all trees.

32  
33 #2 (Hips OR Coxa OR Coxas): ti,ab,kw

34  
35 #3 #1 or # 2

36  
37 #4 MeSH descriptor: [arthroscopy] explode all trees

38  
39 #5 (arthroscop\*): ti,ab,kw

40  
41 #6 #4 or # 5

42  
43 #7 #3 and # 6

44  
45 #8 MeSH descriptor: [Hip Fracture] explode all trees

46  
47 #9 (hip surgery OR hip prothes\* OR hip replacement\* OR hip arthroplast\* OR femoral head  
48 prothes\* OR joint prothes\*): ti,ab,kw

49  
50 #10 ((hip\* or fem?r\* or intertrochant\* or trochant\* or pertrochant\* or intertrochant\* or  
51 peritrochant\* or subtrochant\* or intracapsular\* or extracapsular\* or acetabul\*) and fracture\*)

52  
53 #11 MeSH descriptor: [Osteoarthritis, Hip] explode all trees

#12 (Hip Osteoarthritis OR Osteoarthritis Of Hip OR Osteoarthritis Of Hips OR Coxarthrosis OR Coxarthroses OR Osteoarthritis of the Hip): ti,ab,kw

#13 MeSH descriptor: [Hip Injuries] explode all trees

#14 ((disloca\* or displace\* or dysplas\*) and hip\*)

#15 #7 or #8 or #9 or #10 or #11 or #12 or #13 or #14

#16 MeSH descriptor: [Aged] explode all trees

#17 MeSH descriptor: [Aged, 80 and over] explode all trees

#18 MeSH descriptor: [Aged, 65 and over] explode all trees

#19 MeSH descriptor: [Geriatrics] explode all trees

#20 MeSH descriptor: [Nonagenarians] explode all trees

#21 MeSH descriptor: [Octogenarians] explode all trees

#22((Geriatric\* or Elder\* or old-age or pensioner\*or aging or aged or elderly or senior or old or Oldest Old or old-age or Nonagenarian\* or Octogenarian\*))

#23 #16 or #17 or #18 or #19 or #20 or #21 or #22

#24 (pericapsular nerve group block or PENG): ti,ab,kw

#25 (controlled clinical trial):pt or (randomized controlled trial):pt or (random\*): ti,ab,kw or (Clinical trial):ti,ab,kw

#26 #15 and #23 and #24 and #25

### **Search strategy of Web of Science as follows:**

#1 TS= (Hip or Hips or Coxa or Coxas)

#2 TS= (arthroscop\*)

#3 #1 and #2

#4 TS= (Hip\* or femu\* or femo\* or intertrochant\* or trochant\* or pertrochant\* or intertrochant\* or peritrochant\* or subtrochant\* or intracapsular\* or extracapsular\* or acetabul\*)

#5 TS= (fracture\*)

#6 #4 and #5

#7 TS= (Hip Osteoarthritis or Osteoarthritis of Hip or Osteoarthritis of Hips or Coxarthrosis or Coxarthroses or Osteoarthritis of the Hip)

#8 TS= (Hip Injuries or Hip disloca\* or Hip displace\* or Hip dysplas\*)

#9 #3 OR #6 OR #7 OR #8

1  
2  
3  
4 #10 TS= (Geriatric\* or Elder\* or old-age or pensioner\* or aging or aged or elderly or senior or old  
5 or Oldest Old or old-age or Nonagenarian\* or Octogenarian\*)

6  
7 #11 TS= (pericapsular nerve group block or PENG)

8  
9 #12 TS= (random\* or Clinical trial)

10  
11 #13 #9 and #10 and #11 and #12

12  
13 **Search strategy for Ovid Medline as follows:**

14  
15 #1 exp Hip/

16  
17 #2 (Hips OR Coxa OR Coxas) .mp.

18  
19 #3 #1 or # 2

20  
21 #4 exp arthroscopy/

22  
23 #5 (arthroscop\*).mp.

24  
25 #6 #4 or # 5

26  
27 #7 #3 and # 6

28  
29 #8 exp Hip Fracture/

30  
31 #9 (hip surgery OR hip prosthes\* OR hip replacement\* OR hip arthroplast\* OR femoral head  
32 prosthes\* OR joint prosthes\*).mp.

33  
34 #10 ((hip\* or fem\*r\* or intertrochant\* or trochant\* or pertrochant\* or intertrochant\* or  
35 peritrochant\* or subtrochant\* or intracapsular\* or extracapsular\* or acetabul\*) and fracture\*).mp.

36  
37 #11 exp Osteoarthritis, Hip/

38  
39 #12 (Hip Osteoarthritis or Osteoarthritis of Hip or Osteoarthritis of Hips or Coxarthrosis or  
40 Coxarthroses or Osteoarthritis of the Hip) .mp.

41  
42 #13 exp Hip Injuries/

43  
44 #14 ((disloca\* or displace\* or dysplas\*) and hip\*).mp.

45  
46 #15 #7 or #8 or #9 or #10 or #11 or #12 or #13 or #14

47  
48 #16 exp Aged/

49  
50 #17 exp Aged, 80 and over/

51  
52 #18 exp Aged, 65 and over/

53  
54 #19 exp Geriatrics/

55  
56 #20 exp Nonagenarians/

57  
58 #21 exp Octogenarians/

1  
2  
3  
4 #22((Geriatric\* or Elder\* or old-age or pensioner\*or aging or aged or elderly or senior or old or  
5 Oldest Old or old-age or Nonagenarian\* or Octogenarian\*).mp.

6  
7 #23 #16 or #17 or #18 or #19 or #20 or #21 or #22

8  
9 #24 (pericapsular nerve group block or PENG) .mp.

10  
11 #25 #15 and #23 and #24

12  
13 #26 randomized controlled trial.pt.

14  
15 #27controlled clinical trial.pt.

16  
17 #28 randomized.ab.

18  
19 #29 placebo.ab.

20  
21 #30 clinical trials as topic.sh.

22  
23 #31 randomly.ab.

24  
25 #32 trial.ti.

26  
27 #33 #26 or #27 or #28 or #29 or #30 or #31 or #32

28  
29 #34 (animals not (humans and animals)).sh.

30  
31 #35 #25 and #33 not #34

32  
33 **Search strategy for Embase as follows:**

34  
35 #1 exp Hip/

36  
37 #2 (Hips OR Coxa OR Coxas) .mp.

38  
39 #3 #1 or # 2

40  
41 #4 exp arthroscopy/

42  
43 #5 (arthroscop\*).mp.

44  
45 #6 #4 or # 5

46  
47 #7 #3 and # 6

48  
49 #8 exp Hip Fracture/

50  
51 #9 (hip surgery OR hip prothes\* OR hip replacement\* OR hip arthroplast\* OR femoral head  
52 prothes\* OR joint prothes\*).mp.

53  
54 #10 ((hip\* or fem?r\* or intertrochant\* or trochant\* or pertrochant\* or intertrochant\* or  
55 peritrochant\* or subtrochant\* or intracapsular\* or extracapsular\* or acetabul\*) and fracture\*).mp.

56  
57 #11 exp Osteoarthritis, Hip/

58  
59 #12 (Hip Osteoarthritis or Osteoarthritis of Hip or Osteoarthritis of Hips or Coxarthrosis or  
60

1  
2  
3  
4 Coxarthroses or Osteoarthritis of the Hip) .mp.

5 #13 exp Hip Injuries/

6  
7 #14 ((disloca\* or displace\* or dysplas\*) and hip\*).mp.

8  
9 #15 #7 or #8 or #9 or #10 or #11 or #12 or #13 or #14

10  
11 #16 exp Aged/

12  
13 #17 exp Aged, 80 and over/

14  
15 #18 exp Aged, 65 and over/

16  
17 #19 exp Geriatrics/

18  
19 #20 exp Nonagenarians/

20  
21 #21 exp Octogenarians/

22  
23 #22((Geriatric\* or Elder\* or old-age or pensioner\*or aging or aged or elderly or senior or old or  
24 Oldest Old or old-age or Nonagenarian\* or Octogenarian\*).mp.

25  
26 #23 #16 or #17 or #18 or #19 or #20 or #21 or #22

27  
28 #24 (pericapsular nerve group block or PENG) .mp.

29  
30 #25 #15 and #23 and #24

31  
32 #26 exp randomized controlled trial/

33  
34 #27(random\*).mp.

35  
36 #28 (placebo\*).mp.

37  
38 #29 Clinical trial.mp.

39  
40 #30 clinical trials as topic.sh.

41  
42 #31 #26 or #27 or #28 or #29 or #30

43  
44 #32 (exp animal/ or nonhuman/ or exp animal experiment/) not human/

45  
46 #33 #25 and #31 not #32

#### 47 48 **WHO ICTRP Trial registry**

49  
50 <http://apps.who.int/trialsearch> (WHO ICTRP register) will be searched via the advanced search page.

51  
52 Search terms were: (Hips OR Coxa OR Coxas or fem?r\* or intertrochant\* or trochant\* or  
53 pertrochant\* or intertrochant\* or peritrochant\* or subtrochant\* or intracapsular\* or extracapsular\*  
54 or acetabul\*) AND (Geriatric\* or Elder\* or old-age or pensioner\*or aging or aged or elderly or  
55 senior or old or Oldest Old or old-age or Nonagenarian\* or Octogenarian\*) AND (pericapsular nerve  
56 group block or PENG).  
57  
58  
59  
60

## Clinicaltrials.gov search strategy

<http://clinicaltrials.gov> (NIH register) will be searched via advanced search page. Search terms were:

Condition or disease: (Hips OR Coxa OR Coxas or fem?r\* or intertrochant\* or trochant\* or pertrochant\* or intertrochant\* or peritrochant\* or subtrochant\* or intracapsular\* or extracapsular\* or acetabul\*) AND (Geriatric\* or Elder\* or old-age or pensioner\* or aging or aged or elderly or senior or old or Oldest Old or old-age or Nonagenarian\* or Octogenarian\*).

Study type: Interventional Studies.

Intervention/treatment: (pericapsular nerve group block or PENG)

## Chinese database

### China National Knowledge Infrastructure (CNKI) search strategy

(髌[全部字段]or 关节[全部字段]or 股骨头[全部字段]or 关节唇[全部字段]or 股骨颈 [全部字段] or 转子 [全部字段] or 骨盆 [全部字段] or 关节炎[全部字段] or 骨折[全部字段]or 损伤 [全部字段] or 脱位[全部字段] or 撞击[全部字段] or 关节镜[全部字段] or 微创[全部字段] or 保守[全部字段]or 置换[全部字段] or 成形[全部字段] or 假体[全部字段] or 固定[全部字段] or 外伤[全部字段]) and (关节囊周[全部字段]or PENG[全部字段]or 阻滞 [全部字段]) and (老年[全部字段] or 高龄[全部字段] or 老龄 or 80 岁以上[全部字段]) and (随机[全部字段] or 对照[全部字段])

### Chinese BioMedical Literature (CBM)

(髌[全部字段] or 关节[全部字段] or 股骨头[全部字段]or 关节唇[全部字段] or 股骨颈 [全部字段] or 转子 [全部字段] or 骨盆 [全部字段] or 关节炎[全部字段] or 骨折[全部字段]or 损伤 [全部字段] or 脱位[全部字段] or 撞击[全部字段] or 关节镜[全部字段] or 微创[全部字段] or 保守[全部字段]or 置换[全部字段] or 成形[全部字段] or 假体[全部字段] or 固定[全部字段] or 外伤[全部字段]) and (关节囊周[全部字段]or PENG[全部字段]or 阻滞 [全部字段]) and (老年[全部字段] or 高龄[全部字段] or 老龄 or 80 岁以上[全部字段]) and (随机[全部字段] or 对照[全部字段])

## VIP database

关键词=(髌 or 关节 or 股骨头 or 关节唇 or 股骨颈 or 转子 or 骨盆 or 关节炎 or 骨折 or 损伤 or 脱位 or 撞击 or 关节镜 or 微创 or 保守 or 置换 or 成形 or 假体 or 固定 or 外伤) AND 关键词=(老年 or 高龄 or 老龄 or 80 岁以上) AND 关键词=(关节囊周 or PENG or 阻滞) AND

1  
2  
3  
4 关键词=(随机 or 对照)  
5

6 **Wan fang database.**  
7

8 (髌[全部字段]or 关节[全部字段]股骨头[全部字段]or 关节唇[全部字段]or 股骨颈 [全部字段]  
9 or 转子 [全部字段] or 骨盆 [全部字段] or 关节炎[全部字段] or 骨折[全部字段]or 损伤[全  
10 部字段] or 脱位[全部字段] or 撞击[全部字段] or 关节镜[全部字段] or 微创[全部字段] or 保  
11 守[全部字段]or 置换[全部字段] or 成形[全部字段] or 假体[全部字段] or 固定[全部字段] or  
12 外伤[全部字段]) and (关节囊周[全部字段] or PENG[全部字段] or 阻滞 [全部字段]) and (老  
13 年[全部字段] or 高龄[全部字段] or 老龄 or 80 岁以上[全部字段]) and (随机[全部字段] or 对  
14 照[全部字段])  
15  
16  
17  
18  
19  
20  
21  
22  
23  
24  
25  
26  
27  
28  
29  
30  
31  
32  
33  
34  
35  
36  
37  
38  
39  
40  
41  
42  
43  
44  
45  
46  
47  
48  
49  
50  
51  
52  
53  
54  
55  
56  
57  
58  
59  
60



## Supplementary Appendix file 2 : Assessment of risk of bias

### Random sequence generation

- **Low risk:** If sequence generation was achieved using computer random number generator or a random number table. Drawing lots, tossing a coin, shuffling cards, and throwing dice were also considered adequate if performed by an independent adjudicator.
- **Unclear risk:** If the method of randomisation was not specified, but the trial was still presented as being randomised.
- **High risk:** If the allocation sequence is not randomised or only quasi-randomised. These trials will be excluded.

### Allocation concealment

- **Low risk:** If the allocation of patients was performed by a central independent unit, onsite locked computer or identical-looking numbered sealed envelopes.
- **Uncertain risk:** If the trial was classified as randomised but the allocation concealment process was not described.
- **High risk:** If the allocation sequence was familiar to the investigators who assigned participants.

### Blinding of participants and treatment providers

- **Low risk:** If the participants and the treatment providers were blinded to intervention allocation and this was described.
- **Uncertain risk:** If the procedure of blinding was insufficiently described.
- **High risk:** If blinding of participants and the treatment providers was not performed.

### Blinding of outcome assessment

- **Low risk of bias:** If it was mentioned that outcome assessors were blinded and this was described.
- **Uncertain risk of bias:** If it was not mentioned if the outcome assessors in the trial were blinded or the extent of blinding was insufficiently described.
- **High risk of bias:** If no blinding or incomplete blinding of outcome assessors was performed.

### Incomplete outcome data

- **Low risk of bias:** If missing data were unlikely to make treatment effects depart from plausible

1  
2  
3  
4 values. This could be either (1) there were no drop-outs or withdrawals for all outcomes, or (2)  
5  
6 the numbers and reasons for the withdrawals and drop-outs for all outcomes were clearly stated  
7  
8 and could be described as being similar to both groups. Generally, the trial is judged as at a low  
9  
10 risk of bias due to incomplete outcome data if drop-outs are less than 5%. However, the 5%  
11  
12 cut-off is not definitive.

- 13  
14 ➤ **Uncertain risk of bias:** If there was insufficient information to assess whether missing data  
15  
16 were likely to induce bias on the results.
- 17  
18 ➤ **High risk of bias:** If the results were likely to be biased due to missing data either because the  
19  
20 pattern of drop-outs could be described as being different in the two intervention groups or the  
21  
22 trial used improper methods in dealing with the missing data (e.g. last observation carried  
23  
24 forward).

### 25 **Selective outcome reporting**

- 26  
27 ➤ **Low risk of bias:** If a protocol was published before or at the time the trial was begun and the  
28  
29 outcomes specified in the protocol were reported on. If there is no protocol or the protocol was  
30  
31 published after the trial has begun, reporting of serious adverse events will grant the trial a  
32  
33 grade of low risk of bias.
- 34  
35 ➤ **Uncertain risk of bias:** If no protocol was published and the outcome of serious adverse events  
36  
37 were not reported on.
- 38  
39 ➤ **High risk of bias:** If the outcomes in the protocol were not reported on.

### 40 **Other risks of bias**

- 41  
42 ➤ **Low risk of bias:** If the trial appears to be free of other components that could put it at risk of  
43  
44 bias.
- 45  
46 ➤ **Unclear risk of bias:** If the trial may or may not be free of other components that could put it  
47  
48 at risk of bias.
- 49  
50 ➤ **High risk of bias:** If there are other factors in the trial that could put it at risk of bias (including,  
51  
52 Design-specific risk of bias, stopped early due to some data-dependent process including a  
53  
54 formal-stopping rule, baseline imbalance, claimed fraudulent, blocked randomization in  
55  
56 unblinded trials, differential diagnostic activity, contamination, inappropriate measurement  
57  
58 instrument for outcomes, deviation from the study protocol unrelated to the clinical practice,  
59  
60 authors conducted trials on the same topic, academic bias, for-profit bias, inappropriate

financial conflict of interest).

### Overall risk of bias

- **Low risk of bias:** The trial will be classified as overall ‘low risk of bias’ only if all of the bias domains described in the above paragraphs are classified as ‘low risk of bias’.
- **High risk of bias:** The trial will be classified as ‘high risk of bias’ if any of the bias risk domains described in the above are classified as ‘unclear’ or ‘high risk of bias’.
- We will assess the domains ‘blinding of outcome assessment’, ‘incomplete outcome data’, and ‘selective out- come reporting’ for each outcome result. Thus, we can assess the bias risk for each outcome assessed in addition to each trial. Our primary conclusions will be based on the results of our primary outcome results with overall low risk of bias. Both our primary and secondary conclusions will be presented in the summary of findings tables.

### Criteria classification

- If all risk of bias domains were scored as having a low risk of bias, the trial was defined as having a low overall risk of bias.
- If one or more of the bias domains were scored as unclear or high risk of bias, the trial was defined as having a high overall risk of bias.
- Trials with a low risk of bias in all domains (including sequence generation, allocation concealment, blinding, incomplete data, selective outcome reporting, and other risks of bias) will be classified as having a low overall risk of bias.
- Trials with one or more of these domains scored as unclear or high risk of bias will be defined as having a high overall risk of bias.

## PRISMA-P checklist

**Table** PRISMA-P (preferred reporting items for systematic review and meta-analysis protocols) 2015 checklist: recommended items to address in a systematic review protocol

| Section and topic                 | Item No | Checklist item                                                                                                                                                                                                                | Reported on page # |
|-----------------------------------|---------|-------------------------------------------------------------------------------------------------------------------------------------------------------------------------------------------------------------------------------|--------------------|
| <b>Administrative information</b> |         |                                                                                                                                                                                                                               |                    |
| Title:                            |         |                                                                                                                                                                                                                               |                    |
| Identification                    | 1a      | Identify the report as a protocol of a systematic review                                                                                                                                                                      | 1                  |
| Update                            | 1b      | If the protocol is for an update of a previous systematic review, identify as such                                                                                                                                            | None               |
| Registration                      | 2       | If registered, provide the name of the registry (such as PROSPERO) and registration number                                                                                                                                    | 3,8                |
| Authors:                          |         |                                                                                                                                                                                                                               |                    |
| Contact                           | 3a      | Provide name, institutional affiliation, e-mail address of all protocol authors; provide physical mailing address of corresponding author                                                                                     | 1                  |
| Contributions                     | 3b      | Describe contributions of protocol authors and identify the guarantor of the review                                                                                                                                           | 24                 |
| Amendments                        | 4       | If the protocol represents an amendment of a previously completed or published protocol, identify as such and list changes; otherwise, state plan for documenting important protocol amendments                               | None               |
| Support:                          |         |                                                                                                                                                                                                                               |                    |
| Sponsor                           | 5b      | Provide name for the review funder and/or sponsor                                                                                                                                                                             | None               |
| Role of sponsor or funder         | 5c      | Describe roles of funder(s), sponsor(s), and/or institution(s), if any, in developing the protocol                                                                                                                            | None               |
| <b>Introduction</b>               |         |                                                                                                                                                                                                                               |                    |
| Rationale                         | 6       | Describe the rationale for the review in the context of what is already known                                                                                                                                                 | 4-7                |
| Objectives                        | 7       | Provide an explicit statement of the question(s) the review will address with reference to participants, interventions, comparators, and outcomes (PICO)                                                                      | 7-13               |
| <b>Methods</b>                    |         |                                                                                                                                                                                                                               |                    |
| Eligibility criteria              | 8       | Specify the study characteristics (such as PICO, study design, setting, time frame) and report characteristics (such as years considered, language, publication status) to be used as criteria for eligibility for the review | 8-13 ; 14-15       |

1  
2  
3  
4

|                            |                                    |     |                                                                                                                                                                                                                                                  |           |
|----------------------------|------------------------------------|-----|--------------------------------------------------------------------------------------------------------------------------------------------------------------------------------------------------------------------------------------------------|-----------|
| 5<br>6<br>7                | Information sources                | 9   | Describe all intended information sources (such as electronic databases, contact with study authors, trial registers or other grey literature sources) with planned dates of coverage                                                            | 13-16     |
| 8                          | Search strategy                    | 10  | Present draft of search strategy to be used for at least one electronic database, including planned limits, such that it could be repeated                                                                                                       | 13-14, S1 |
| 9                          | Study records:                     |     |                                                                                                                                                                                                                                                  |           |
| 10<br>11                   | Data management                    | 11a | Describe the mechanism(s) that will be used to manage records and data throughout the review                                                                                                                                                     | 14-16     |
| 12<br>13                   | Selection process                  | 11b | State the process that will be used for selecting studies (such as two independent reviewers) through each phase of the review (that is, screening, eligibility and inclusion in meta-analysis)                                                  | 14-15     |
| 14<br>15<br>16             | Data collection process            | 11c | Describe planned method of extracting data from reports (such as piloting forms, done independently, in duplicate), any processes for obtaining and confirming data from investigators                                                           | 14-16     |
| 17<br>18                   | Data items                         | 12  | List and define all variables for which data will be sought (such as PICO items, funding sources), any pre-planned data assumptions and simplifications                                                                                          | 16        |
| 19<br>20                   | Outcomes and prioritization        | 13  | List and define all outcomes for which data will be sought, including prioritization of main and additional outcomes, with rationale                                                                                                             | 10-13     |
| 21<br>22<br>23             | Risk of bias in individual studies | 14  | Describe anticipated methods for assessing risk of bias of individual studies, including whether this will be done at the outcome or study level, or both; state how this information will be used in data synthesis                             | 16-20     |
| 24<br>25<br>26<br>27<br>28 | Data synthesis                     | 15a | Describe criteria under which study data will be quantitatively synthesised                                                                                                                                                                      | 17        |
| 29<br>30<br>31             |                                    | 15b | If data are appropriate for quantitative synthesis, describe planned summary measures, methods of handling data and methods of combining data from studies, including any planned exploration of consistency (such as $I^2$ , Kendall's $\tau$ ) | 17        |
|                            |                                    | 15c | Describe any proposed additional analyses (such as sensitivity or subgroup analyses, meta-regression)                                                                                                                                            | 18-21     |
|                            |                                    | 15d | If quantitative synthesis is not appropriate, describe the type of summary planned                                                                                                                                                               | 17        |
| 32<br>33                   | Meta-bias(es)                      | 16  | Specify any planned assessment of meta-bias(es) (such as publication bias across studies, selective reporting within studies)                                                                                                                    | 20        |
| 34<br>35<br>36             | Confidence in cumulative evidence  | 17  | Describe how the strength of the body of evidence will be assessed (such as GRADE)                                                                                                                                                               | 18-20     |

37  
38  
39  
40  
41  
42  
43  
44  
45  
46
